# Supplementary material for: Octreotide-LAR in later-stage autosomal dominant polycystic kidney disease (ALADIN 2): A randomized, double-blind, placebo-controlled, multicenter trial
Source: PLoS Med. 2019 Apr 5;16(4):e1002777. doi: 10.1371/journal.pmed.1002777 (PMC6450618; doi:10.1371/journal.pmed.1002777)
Supplement: S2 Text — (PDF) [file pmed.1002777.s015.pdf]

---

**A PROSPECTIVE, RANDOMIZED, DOUBLE-BLIND, PLACEBO  
CONTROLLED CLINICAL TRIAL TO ASSESS  
THE EFFECTS OF LONG-ACTING SOMATOSTATIN (OCTREOTIDE LAR)  
THERAPY ON DISEASE PROGRESSION IN PATIENTS  
WITH AUTOSOMAL DOMINANT POLYCYSTIC KIDNEY DISEASE AND  
MODERATE TO SEVERE RENAL INSUFFICIENCY  
(ALADIN 2 STUDY)**

**Sponsor:** IRCCS Mario Negri Institute for Pharmacological research  
Clinical Research Center for Rare Diseases  
*Aldo e Cele Daccò - Ranica, Bergamo (Italy)*

**Co-sponsor:** Novartis Farma S.p.A.  
Origgio, Varese (Italy)

**Principal Investigators:** Dr. Piero Ruggenenti  
Dr. Norberto Perico

---

**STATISTICAL ANALYSIS PLAN (VERSION 1.0)**

**Study Number:** EUDRACT 2011-000138-12

**DATE** September 06, 2013

**AUTHOR** Annalisa Perna

**REVIEW**  
Giuseppe Remuzzi  
Piero Ruggenenti

**APPROVAL**

\_\_September 06, 2013\_\_  
(Date)

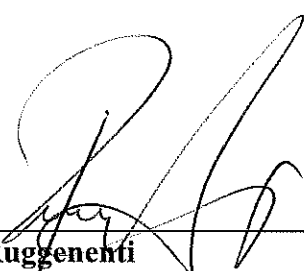

---

**Piero Ruggenenti**  
*Department of Renal Medicine  
IRCCS Mario Negri Institute for Pharmacological Research,  
Clinical Research Center for Rare Diseases,  
Ranica (Bergamo), Italy*

\_\_September 06, 2013\_\_  
(Date)

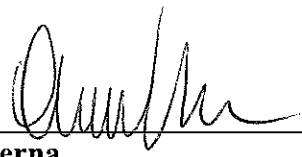

---

**Annalisa Perna**  
*Department of Renal Medicine  
Laboratory of Biostatistics  
IRCCS Mario Negri Institute for Pharmacological Research,  
Clinical Research Center for Rare Diseases,  
Ranica (Bergamo), Italy*

**CONTENTS**

|                                                                  |    |
|------------------------------------------------------------------|----|
| 1. INTRODUCTION                                                  | 5  |
| 2. STUDY CONDUCT                                                 | 8  |
| 2.1 Analysis Populations                                         | 8  |
| 2.2 Patient Accounting                                           | 9  |
| 2.3 Protocol Violations                                          | 9  |
| 2.4 Compliance and Adherence to Study Schedule                   | 10 |
| 3. STATISTICAL METHODS                                           | 11 |
| 3.1 Baseline Summaries                                           | 11 |
| 3.2 Analysis Specifications                                      | 14 |
| 3.3 Efficacy Analysis                                            | 14 |
| 3.3.1.1 One Year Primary Efficacy Parameter                      | 14 |
| 3.3.1.2 Three Years Primary efficacy Parameter                   | 15 |
| 3.3.2 Secondary Efficacy Parameters                              | 15 |
| 3.3.2.1 Blood Pressure, Heart Rate and Weight                    | 15 |
| 3.3.2.2 Serum Creatinine                                         | 15 |
| 3.3.2.3 Hematochemistry                                          | 15 |
| 3.3.2.4 Creatinine Clearance                                     | 16 |
| 3.3.2.5 24 Hours Urine Collection                                | 16 |
| 3.3.2.6 Spot Morning Urine                                       | 16 |
| 3.3.2.7 TKV, absolute and percent TKV changes                    | 16 |
| 3.3.2.8 htTKV, absolute and percent htTKV changes                | 16 |
| 3.3.2.9 Hemochrome                                               | 17 |
| 3.3.2.10 Total slope eGFR (MDRD and CKD formula)                 | 17 |
| 3.3.2.11 Chronic slope mGFR and eGFR (MDRD and CKD formula)      | 17 |
| 3.3.3 Other Efficacy Parameters                                  | 18 |
| 3.3.3.1 Time to ESRD and to Composite Endpoint                   | 18 |
| 3.3.3.2 Overall,,Cardiovascular and Non-cardiovascular Mortality | 19 |
| 3.3.3.3 Incidence of Major cardiovascular Events                 | 19 |
| 3.4 Safety Analysis                                              | 20 |
| 3.4.1 Adverse Events                                             | 21 |
| 3.4.2 Deaths                                                     | 21 |
| 3.4.3 Laboratory Tests                                           | 21 |
| 3.4.4 Urine Analysis                                             | 22 |

## **CONTENTS (continued)**

|                        |    |
|------------------------|----|
| 4. PROPOSED TABLES     | 24 |
| 5. PROPOSED FIGURES    | 26 |
| 6. PROPOSED APPENDICES | 27 |
| 7. TABLE TEMPLATES     |    |

## SECTION 1

**INTRODUCTION**

---

This study is a multi-centre, prospective, randomised double-blind parallel-group comparison of long acting somatostatin analogue (Octreotide LAR) and placebo.

The study is coordinated by the Clinical Research Center for Rare Diseases of the Mario Negri Institute for Pharmacological Research, Ranica, Bergamo and will be conducted with the cooperation of:

- Hospital '*Ospedale San Giovanni di Dio*', Agrigento, Italy;
- Clinical Research Center for Rare Diseases '*Aldo e Cele Daccò*', Ranica (Bergamo), Italy
- Hospital '*Ospedale Vito Fazzi*', Lecce, Italy
- Hospital '*Ospedale Maggiore Policlinico, Mangiagalli e Regina Elena*', Milan, Italy
- University '*Università Federico II*', Naples, Italy
- Hospital '*Ospedale Ca' Foncello*', Treviso, Italy

Eligible patients will be stratified for the presence (YES or NO) of concomitant clinical conditions that could appreciably affect the rate of renal function loss over time including diabetes mellitus, 24 hour urinary protein excretion >1g, or any other evidence of concomitant renal disease without indication for specific therapy. Within each stratum patients will be randomized on a 1:1 basis to Long-acting Somatostatin (Octreotide LAR) 40 mg (treatment group) or saline solution (placebo group). Data will be collected by means of an *ad-hoc* study Case Report Form (see Appendix 1).

The general aim of the trial is to assess the efficacy of one year treatment with long-acting somatostatin analogue (Octreotide LAR) compared with placebo in slowing kidney and liver growth rate in patients with ADPKD and moderate/severe renal insufficiency (estimated GFR by MDRD 4 variables: 15-40 ml/min/1.73m<sup>2</sup>) and to assess whether and to which extent this translates into slower renal function decline over 3-year follow-up.

Primary objectives are the followings: to compare the effect of long acting somatostatin analogue (Octreotide LAR) versus placebo on total kidney volume (TKV) change (delta TKV) as assessed by spiral computed tomography (spiral CT)

scan (short-term, one year) and to compare the effect of long-acting somatostatin analogue (Octreotide LAR) vs. placebo on the rate of GFR decline as assessed by serial measurements of the iohexol plasma clearance (long-term, three years).

The secondary objectives are to compare, among the two groups, absolute and relative changes in renal and liver volume parameters (at month 0, 12 and 36) as well as in functional and biochemical parameters by quarterly clinical visits during the 36 month follow-up. In particular, the following parameters will be assessed:

- Total kidney volume (at 3-years)
- Total renal cyst volume\*
- Total renal parenchyma volume\*
- Total renal intermediate volume\*
- Total liver and liver cyst volumes\*

*\*When feasible, by minimized radio contrast agent administration during CT acquisition*

- GFR decline (as assessed by serial measurements of the plasma iohexol clearance at month 0 and, every 6 months thereafter)
- Slope of eGFR (by MDRD 4 variable equation)
- Progression to the combined end point of doubling of serum creatinine and/or ESRD (*ESRD: need for chronic renal replacement therapy by dialysis or transplantation established on the basis of standard clinical criteria*)
- Progression to ESRD considered as a single endpoint
- Systolic, diastolic and mean blood pressure
- 24 h urinary protein excretion rate (at month 0 and every six months thereafter)
- Urinary osmolality (assessed from urine sodium, urea and glucose concentration on 24 hr urine samples)
- Morning spot urine sample (proteins, albumin, creatinine)
- Serum Insulin Growth Factor-1 (IGF-I)
- 24 h urinary phosphorus, creatinine and creatinine clearance
- Gallbladder sand/stones and renal stones (by ultrasonography).

In a subgroup of patients referred to the Clinical Research Center for Rare Diseases 'Aldo e Cele Daccò' and/or other institutions where these evaluations are feasible the

following other secondary objectives are to compare, among the two groups the quality of life and the societal costs by submitting to consenting patients a *Quality of life (QoL) Questionnaire* - Version 1 of SF-36 (QoL SF-36 V1™ Questionnaire) validated in Italy – and a *Short-Form-Health and Labour Questionnaire (SFHLQ)*. (See Appendix 2).

Furthermore, for exploratory purposes only, the treatment effect on endothelin and MCP-1 urinary excretion rate (overnight urine sample), in a subgroup (pending on study findings and fund availability).

This statistical analysis plan will be reviewed at the blind review of the ALADIN 2 data and modifications in light of the study conduct considered in line with the recommendations in the International Conference on Harmonization (ICH) guideline, ‘Statistical Principles for Clinical Trials E9’ (ICH (1998)). The above statistical plan is inspired to the ALADIN trial report (Caroli 2013), due to the analogies with ALADIN 2 study design.

## SECTION 2

### STUDY CONDUCT

---

#### 2.1 ANALYSIS POPULATIONS

Several analysis populations will be used:

##### **Full Analysis Set**

This set will consist of all patients randomised to receive study medication in the ALADIN 2 study.

##### **Per-Protocol Set**

This set will include all patients randomised to receive study medication in the ALADIN 2 study. All patients who have major protocol violations (see Paragraph 2.3) will be excluded.

##### **Safety Set**

This set will consist of all patients who received at least one dose of study medication.

A decision regarding the exact composition of the Per-Protocol Set will be made at the 'blind review' stage.

The efficacy analysis will be performed on both the Full Analysis Set and the Per-Protocol Analysis Set. The analysis performed on the Full Analysis Set should be considered the primary one.

The safety analysis will be performed on the Safety Set.

## 2.2 PATIENT ACCOUNTING

Individual patient randomisation details will be presented in Appendix 21.

Patient accounting details will be presented in Table 1.1. This table will provide numbers of patients in each of the analysis populations and the number of patients per site.

An outline of the treatment phase is described in the flow chart of the study (Appendix 3).

Table 1.2 will show the numbers of patients remaining in the study, in each treatment group and overall, at each of the follow-up time points, for the Full Analysis Set and the Per Protocol Set.

The reasons for withdrawal will be summarised in Table 1.3, by treatment group and overall. In addition, an individual patient data listing of trial-end details will be provided in Appendix 4.

## 2.3 PROTOCOL VIOLATIONS

The following are defined to be major protocol violations.

- Age <18 years
- Absence of clinical diagnosis of ADPKD
- Absence of ultrasound diagnosis of ADPKD
- Written Informed consent not given
- Presence of symptomatic biliary tract lithiasis
- Presence of active cancer
- Presence of psychiatric disorders or any condition that might prevent full comprehension of the purposes and risks of the study
- Presence of pregnancy, lactation or child bearing potential and ineffective contraception

During follow-up:

- Temporary withdrawal for at least 30 consecutive days or total amount of temporary withdrawal days more or equal to 20% of total duration of treatment phase
- Study duration less than 3 months when the main reason for discontinuation is: unsatisfactory efficacy, unsatisfactory compliance, protocol violation, lost of follow-up, withdrawal of consent. Patients who discontinued due to adverse event or death are *not* considered as major protocol violators.
- Breaking the blind code after randomization.

All remaining violations are to be considered minor protocol violations.

An individual patient data listing of all detected protocol violations (major and minor) will be provided in Appendix 5, identifying major protocol violations which resulted in the exclusion of the patient from the Per Protocol Set. Tables 1.4.1 and 1.4.2 summarize how often different types of violations occurred.

## **2.4 COMPLIANCE AND ADHERENCE TO STUDY SCHEDULE**

Compliance details, in terms of temporary withdrawal, will be listed in Appendix 11.

The differences between actual and scheduled timing of each of the visits will be summarised in Table 1.5. The following schedule in relation to the differencing of dates will be adopted:

|                      |                       |
|----------------------|-----------------------|
| One week = 7 days,   | One month = 30 days,  |
| 3 months = 91 days,  | 6 months = 183 days,  |
| 9 months = 274 days, | 12 months = 365 days, |

|                        |                       |
|------------------------|-----------------------|
| 15 months = 456 days,  | 18 months = 548 days, |
| 21 months = 639 days,  | 24 months = 730 days, |
| 27 months = 821 days,  | 30 months = 913 days, |
| 36 months = 1095 days. |                       |

The following acceptable time windows in relation to the differencing of dates will be considered:

|                             |                           |
|-----------------------------|---------------------------|
| One week = 4-10 days,       | One month = 20-40 days,   |
| 3 months = 61-121 days,     | 6 months = 153-213 days,  |
| 9 months = 244-304 days,    | 12 months = 335-395 days, |
| 15 months = 426-486 days,   | 18 months = 518-578 days, |
| 21 months = 609-669 days,   | 24 months = 700-760 days, |
| 27 months = 791-851 days,   | 30 months = 883-943 days, |
| 36 months = 1065-1125 days. |                           |

### SECTION 3

## STATISTICAL METHODS

---

### 3.1 BASELINE SUMMARIES

The baseline visit is Visit 2 (Time 0). Summary statistics will be tabulated by treatment group, to assess the comparability of the groups, and overall, to describe the patient population (Full Analysis Set and Per Protocol Set), for the following parameters:

- Age, Gender, Race, Weight, Smoke, Alcohol, Coffee/tea, Marital Status, Education, Professional Status overall (Table 2.1.1) and according to stratum: CCC absent (Table 2.1.2) and to stratum: CCC present (Table 2.1.3)

- Vital signs: Blood Pressure (systolic and diastolic), Pulse Rate, Weight, Mean Arterial Pressure (defined as  $\frac{2}{3}$  diastolic blood pressure plus  $\frac{1}{3}$  systolic blood pressure) and ECG results overall (Table 2.2.1) and according to stratum: CCC absent (Table 2.2.2) and to stratum: CCC present (Table 2.2.3)
- TKV, height-adjusted TKV, overall (Table 2.3.1) and according to stratum: CCC absent (Table 2.3.2) and to stratum: CCC present (Table 2.3.3)
- mGlomerular Filtration Rate (m = measured) measured by iohexol plasma clearance (Table 2.4.1) overall and according to stratum: CCC absent (Table 2.4.2) and to stratum: CCC present (Table 2.4.3)
- eGlomerular Filtration Rate (e = estimated) using the 'four variable' abbreviated MDRD formula:  $GFR = 186 \times (SCR)^{-1.154} \times (Age)^{-0.203} \times (0.755 \text{ if female}) \times (1.210 \text{ if African-American})$  (Table 2.5.1) overall and according to stratum: CCC absent (Table 2.5.2) and to stratum: CCC present (Table 2.5.3)
- eGlomerular Filtration Rate (e = estimated) using the CKD-EPI equation (Levey 2009): if female and serum creatinine  $\leq 0.7$  mg/dl:  $144 \times (0.993)^{Age} \times (Scr/0.7)^{-0.329}$ ; if female and serum creatinine  $> 0.7$  mg/dl:  $144 \times (0.993)^{Age} \times (Scr/0.7)^{-1.209}$ ; if male and serum creatinine  $\leq 0.9$  mg/dl:  $141 \times (0.993)^{Age} \times (Scr/0.7)^{-0.411}$ ; if male and serum creatinine  $> 0.9$  mg/dl:  $141 \times (0.993)^{Age} \times (Scr/0.7)^{-1.209}$  (Table 2.6.1) overall and according to stratum: CCC absent (Table 2.6.2) and to stratum: CCC present (Table 2.6.3)
- Serum creatinine (Table 2.7.1) overall and according to stratum: CCC absent (Table 2.7.2) and to stratum: CCC present (Table 2.7.3)
- Hematochemistry: Urea, Sodium, Potassium, Calcium, Phosphorus, GOT, GPT, GGT, Alkaline phosphatase, total bilirubin, Direct Bilirubin, glucose, HbA1c, Uric Acid, Total Proteins, Albumin, IGF1 (Tables 2.8.1-2.24.1) overall and according to stratum: CCC absent (Tables 2.8.2-2.24.2) and to stratum: CCC present (Table 2.8.3-2.24.3)
- Lipid profile: Total cholesterol, HDL cholesterol, LDL cholesterol, Triglycerides (Tables 2.25.1-2.28.1) overall and according to stratum: CCC absent (Tables 2.25.2-2.28.2) and to stratum: CCC present (Table 2.25.3-2.28.3)

- Hemochrome: Leukocytes, Platelets, Erythrocytes, Hemoglobin, Hematocrit (Tables 2.29.1-2.33.1) overall and according to stratum: CCC absent (Tables 2.29.2-2.33.2) and to stratum: CCC present (Table 2.29.3-2.33.3)
- 24 Hours Urine collection: Proteins, Creatinine, Creatinine Clearance, Sodium, Urea, Glucose, Phosphate, Osmolality (Tables 2.34.1-2.41.1) overall and according to stratum: CCC absent (Tables 2.34.2-2.41.2) and to stratum: CCC present (Table 2.34.3-2.41.3)
- Spot Morning Urine: Proteins, Albumin, Creatinine, Protein-to-creatinine ratio, Albumin-to-creatinine ratio (Tables 2.42.1-2.46.1) overall and according to stratum: CCC absent (Tables 2.42.2-2.46.2) and to stratum: CCC present (Table 2.42.3-2.46.3)
- Previous Diseases (Table 2.47.1) overall and according to stratum: CCC absent (Table 2.47.2) and to stratum: CCC present (Table 2.47.3)
- Previous Medication/Non-Drug Therapy (Table 2.48.1) overall and according to stratum: CCC absent (Table 2.48.2) and to stratum: CCC present (Table 2.48.3)
- Concomitant Diseases (Table 2.49.1) overall and according to stratum: CCC absent (Table 2.49.2) and to stratum: CCC present (Table 2.49.3)
- Concomitant Medication/Non-Drug Therapy (Table 2.50.1) overall and according to stratum: CCC absent (Table 2.50.2) and to stratum: CCC present (Table 2.50.3)

For 'continuous' variables (e.g. age) the statistics presented will be mean(sd), median, Q1, Q3, minimum, and maximum and number of patients. For categorical variables (e.g. gender) frequency counts and percentages will be provided. Diseases will be summarised by MedDRA preferred term and medication/non-drug therapy will be summarised by ATC class (level 2), in terms of frequency counts and percentages.

Individual patient data listings of demographic data, previous diseases, concomitant diseases, previous medication/non-drug therapy and concomitant medication/non-drug therapy will be presented in Appendices 6 to 10 respectively.

### **3.2 ANALYSIS SPECIFICATIONS**

Assumptions underlying all parametric analyses will be checked and transformations to normality (e.g. log-transformation) or non-parametric methods used, where violations of assumptions are seen.

For efficacy analyses based on the Full Analysis Set, no imputation of missing values will be performed. The last available data value will be used to calculate the time to onset of an event.

For both the analyses based on the Full Analysis Set and the Per Protocol Set, visit windows will not be used and data points will be classified according to the named (nominal) visit.

All statistical tests will be two-sided unless otherwise stated.

### **3.3 EFFICACY ANALYSIS**

Primary efficacy analysis at one year is referred to TKV absolute change from time 0 (Visit 2) to 12 months (Visit 7). Primary efficacy analysis at three years is referred to the measured GFR slope from time 0 (Visit 2) onward.

#### **3.3.1.1 One Year Primary Efficacy Parameter**

The short-term primary efficacy variable at one year, i.e. absolute change at 12 months from baseline in TKV, will be compared between the treatment groups using analysis of covariance (ANCOVA) model of the log-transformed TKV, including baseline TKV, age and gender as covariates. Details including least square means and standard errors, and covariate coefficients, standard errors, p-values and 95% confidence intervals will be provided respectively. (Senn (1997)). In case of departure from Normality assumptions in the log-transformed TKV distribution a non parametric approach will be used instead. Summary statistics, namely mean (sd), median, q1, q3, minimum, and

maximum for TKV and absolute TKV change from baseline to six months will be tabulated by nominal visit and treatment group (Tables 3.1.1-3.1.3).

### **3.3.1.2 Three Years Primary Efficacy Parameter**

The long-term primary efficacy variable - i.e. measured GFR total slope – will be assessed with a linear regression analysis and compared with the Wilcoxon rank-sum test. Exploratory linear mixed-models using SAS PROC MIXED will be also used measured GFR repeated measures, with age, gender and baseline measured GFR as covariates. Between-groups differences in median GFR slopes and their 95% CI were determined by means of Hodges-Lehmann Estimation using the SAS PROC NPAR1WAY. Summary statistics, namely mean (sd), median, q1, q3, minimum, and maximum for measured GFR will be tabulated by nominal visit and treatment group. Moreover, relevant summary statistics will be presented for measured GFR total slope (overall and according to stratum CCC absent or stratum CCC present).

## **3.3.2 Secondary Efficacy Parameters**

### **3.3.2.1 Blood Pressure, Pulse Rate and Weight (Tables 3.3.1 to 3.7.3)**

Summary statistics, namely mean (sd), median, q1, q3, minimum, and maximum for the mean systolic and mean diastolic blood pressure, mean arterial pressure, pulse rate and weight, will be tabulated by nominal visit and treatment group.

### **3.3.2.2 Serum Creatinine (Tables 3.8.1-3.8.3)**

Summary statistics, namely mean (sd), median, q1, q3, minimum, and maximum for serum creatinine, will be tabulated by nominal visit and treatment group.

### **3.3.2.3 Hematochemistry (Tables 3.9.1 3.25.3)**

Summary statistics, namely mean (sd), median, q1, q3, minimum, and maximum for Urea, Sodium, Potassium, Calcium, phosphorus, GOT, GPT, GGT, Alkaline phosphatase,

total bilirubin, Direct Bilirubin, glucose, HbA1c, Uric Acid, Total Proteins, Albumin and IGF1 will be tabulated by nominal visit and treatment group.

#### **3.3.2.4 Creatinine Clearance (Tables 3.26.1 to 3.26.3)**

Summary statistics, namely mean (sd), median, q1, q3, minimum, and maximum for Proteins, Creatinine, Creatinine Clearance, Sodium, Urea, Glucose, Phosphate and Osmolality will be tabulated by nominal visit and treatment group.

#### **3.3.2.5 24 Hours Urine Collection (Tables 3.27.1 to 3.33. 3)**

Summary statistics, namely mean (sd), median, q1, q3, minimum, and maximum for Proteins, Creatinine, Sodium, Urea, Glucose, Phosphate and Osmolality will be tabulated by nominal visit and treatment group.

#### **3.3.2.6 Spot Morning Urine (Tables 3.34.1 to 3.38.3)**

Summary statistics, namely mean (sd), median, q1, q3, minimum, and maximum for Proteins, Albumin, Creatinine, Protein-to-creatinine ratio, and Albumin-to-creatinine ratio will be tabulated by nominal visit and treatment group.

#### **3.3.2.7 TKV and absolute and percent changes in TKV (Tables 3.39.1 to 3.39.3)**

Summary statistics, namely mean (sd), median, q1, q3, minimum, and maximum for TKV and TKV absolute and percent changes from baseline onward will be tabulated by nominal visit and treatment group.

#### **3.3.2.8 Height-adjusted TKV, absolute and percent changes in height-adjusted TKV (Tables 3.40.1 to 3.40.3)**

Summary statistics, namely mean (sd), median, q1, q3, minimum, and maximum for height-adjusted TKV and absolute

and percent changes in height-adjusted TKV from baseline onward will be tabulated by nominal visit and treatment group.

#### **3.3.2.9 Lipid profile (Tables 3.41.1 to 3.44.3)**

Summary statistics, namely mean (sd), median, q1, q3, minimum, and maximum for Total cholesterol, HDL cholesterol, LDL cholesterol and Triglycerides will be tabulated by nominal visit and treatment group.

#### **3.3.2.10 Hemochrome (Tables 3.45.1 to 3.49.3)**

Summary statistics, namely mean (sd), median, q1, q3, minimum, and maximum for Leukocytes, Platelets, Erythrocytes, Hemoglobin and Hematocrit will be tabulated by nominal visit and treatment group.

#### **3.3.2.11 Total slope of eGFR<sub>mdrd</sub> and eGFR<sub>ckd-epi</sub> (Tables 3.50.1-3.51.3)**

The total slope of eGFR<sub>mdrd</sub> and eGFR<sub>ckd-epi</sub> will be described by the slope calculated for each patient using linear regression. Relevant summary statistics and the results of the analyses will be presented in Tables 3.50.1-3.51.3.

#### **3.3.2.1 Chronic Slope of mGFR, eGFR<sub>mdrd</sub> and eGFR<sub>ckd-epi</sub> (Tables 3.2, 3.52, 3.53)**

The chronic slope of mGFR, eGFR<sub>mdrd</sub> and eGFR<sub>ckd-epi</sub> will be calculated from six months onward and described by the slope calculated for each patient using linear regression. Relevant summary statistics and the results of the analyses will be presented in Tables 3.2, 3.52 and 3.53.

### **3.3.3 Other Efficacy Parameters**

#### **3.3.3.1 Time to ESRD and time to doubling of Serum Creatinine or ESRD (Tables 3.53.1-3.53.2, 3.54.1-3.54.2, Figures 1 and 2)**

The time to the ESRD and the time to the composite endpoint 'doubling of serum creatinine or ESRD' will give rise to right censored data. Kaplan-Meier curves will be plotted in Figures 1 and 2 and summary statistics, including the Kaplan-Meier estimates of the proportions of patients event-free at monthly intervals, median event times and proportions of patients providing censored values, will be given in Table 3.53.1 and 3.54.1 respectively. Confidence intervals from these proportions and for the median event time calculated using Greenwood's formula will also be provided in Table 3.53.1 and 3.54.1. Cumulative event curves will be constructed using the Kaplan-Meier procedure and the Cox regression model will be used to estimate the hazard ratio for the ESRD endpoint and 'doubling of serum creatinine or ESRD' composite endpoint with the corresponding 95% CI. The model will be adjusted for age, gender and baseline serum creatinine. Participants who didn't reach the outcome of interest will be considered as right censored. Proportionality assumptions were assessed using Schoenfeld residuals. Individual patient data for the time to ESRD and time to doubling of serum creatinine or ESRD will be listed in Appendix 12 and 13

#### **3.3.3.2 Overall, Cardiovascular and Non-cardiovascular Mortality (Tables 3.55.1 to 3.57.2 and Figures 3,4 and 5)**

Time to total death, time to cardiovascular death and time to non-cardiovascular death will be analysed as time to ESRD, outlined in Section 3.3.3.1. Kaplan-Meier curves will be plotted in Figures 3,4 and 5 while Tables 3.55.1 to 3.57.2 will contain, respectively, summary statistics associated with the

Kaplan-Meier curves, and Proportional Hazards regression model fitting details. Individual patient data for the time to death, time to cardiovascular mortality and time to non-cardiovascular mortality will be listed in Appendices 14-16.

### **3.3.3.3 Incidence of Major Cardiovascular Events (Tables 3.58.1-3.58.2 and Figure 6)**

Classification of major cardiovascular events will take place at the 'blind review' stage. A "major" CV event is, by definition, a fatal or nonfatal Serious Adverse Event (SAE). Consequently, the final list of all SAEs identified for SAE reconciliation will be considered also for classifying each event as "major CV" or not. The CV events proposed as "major" will be "peripheral revascularization or amputation", including: first event of Myocardial Infarction (MI), stroke, Transitory Ischemic Attack (TIA), first hospitalisation for heart failure, unstable angina, coronary or peripheral revascularization, mesenteric infarction or amputation. "First event" is specified in order to avoid the situation of counting the patient twice for the same event. A composite endpoint of the above mentioned "major" CV events will be considered. The single components (events) will also be evaluated. Carotid stenoses or any other vascular disease that does not result in any of the above events will not be considered as major CV events, but just as vascular changes. Frequency distributions for the number of cardiovascular events per patient will be tabulated by treatment group in Table 3.58.1. The time to the first major cardiovascular event will be analysed as time to ESRD, outlined in Section 3.3.3.1. Kaplan-Meier curves will be plotted in Figure 6, while Table 3.58.2 will contain summary statistics associated with the Kaplan-Meier curves, and Proportional Hazards regression model fitting details. Individual patient data for the time to first major cardiovascular event will be listed in Appendix 17.

### 3.4 SAFETY ANALYSIS

All safety analyses will be performed using the Safety Set

#### 3.4.1 Adverse Events (Tables 4.1 to 4.5)

Adverse events with an onset after the 1<sup>st</sup> drug intake will be coded using the MedDRA classification system. Multiple reports of the same event by the same patient will be counted only once for the purposes of summary. This 'composite' event will have the 'worst' aspects of the observed multiple reports attributed to it. In particular, the worst maximum intensity, the most likely relationship to study medication and the most serious of the observed multiple reports will be attributed to the composite report. Also, if any of the multiple reports led to study drug discontinuation, this will be attributed to the composite report. This same approach will be used within a defined time period of the study, when summary of adverse events within sub-periods is undertaken. Missing values for dates will be imputed in the following way: '1' for day missing, 'January' for month missing. If however the year is missing this date will be considered as missing.

All adverse event summaries will be presented by treatment group and overall.

An overall summary of adverse events will be provided in Tables 4.1-4.5. This table will provide information on the numbers and percentages of patients with adverse events, serious adverse events, non-serious adverse events, severe adverse events, adverse events considered by the investigator to be probably related to the study drug and adverse events leading to permanent discontinuation. In addition, this table will show the average number of adverse events per patient, the average number of adverse events per patient experiencing adverse events and the number of deaths. A similar summary will be provided in Table 4.4 for serious adverse events only.

Adverse events (MedDRA preferred term) will be summarised by body system in Table 4.3. Similar summaries will be provided in Tables 4.4 to 4.5 for serious adverse events and deaths. Within the text of the statistical report, a summary of serious adverse events will be presented by treatment group, classifying whether each serious adverse event was:

- life-threatening
- permanently disabling
- required / prolonged hospitalisation
- cancer, congenital anomaly, result of overdose

Individual patient adverse event data will be listed in Appendix 18.

### **3.4.2 Death (Table 4.5)**

The number of patients dying during the study will be presented by treatment group in Table 4.5. The reasons for death will also be summarised in terms of frequency counts and percentages.

### **3.4.3 Laboratory Tests (Tables 4.6 to 4.23)**

Table 4.6 will contain summary statistics by treatment group for the complete collection of laboratory variables collected at Week 0. The statistics used will be mean(sd), median, minimum, and maximum and frequencies of normal or abnormal but not clinically relevant values (N) and abnormal and clinically relevant values (P).

Summary statistics will be provided for the 'selected' laboratory tests and for the change from baseline in the 'selected' laboratory tests at

each visit and also for the final visit (last value available) in Tables 4.6 to 4.23.

Individual patient laboratory data will be presented in Appendix 19.

#### **3.4.4 Urine Analysis (Tables 4.24 to 4.30)**

The first set of urine analysis tests at each visit will be used in the summaries.

Shift tables showing movement in terms of NN, NP, PN, PP (N=negative, P=positive) will be provided in Tables 4.24 to 4.30 for the urine analysis tests (leukocytes, nitrates, ketones, pH, glucose, Hb, proteins). pH will be summarised using the same categories as the 'selected' laboratory tests.

Individual patient urine analysis data will be listed in Appendix 20.

## REFERENCES

### *ICH 1998*

The ICH Guideline E9 Statistical Principles for Clinical Trials; European Medicines Agency 1998..

### *Caroli 2013*

Caroli A, Perico N, Perna A, Antiga L, Brambilla P, Pisani A, et al. Effect of longacting somatostatin analogue on kidney and cyst growth in autosomal dominant polycystic kidney disease (ALADIN): a randomised, placebo-controlled, multicentre trial. *Lancet* 2013; 382: 1485-95.

### *Levey 2009*

Levey AS et al. A new equation to estimate glomerular filtration rate. *Ann Intern Med* 2009; 150: 604-612

### *Senn 1997*

Senn S. Statistical issues in drug development. Chichester: Wiley; 1997

## SECTION 4

**PROPOSED TABLES**

---

- 1.1 Analysis Populations
- 1.2 Number of Randomised Patients at each Visit
- 1.3 Reasons for Withdrawal
- 1.4.1 Major protocol violations
- 1.4.2 Minor protocol violations
- 1.5 Adherence to Study Schedule
- 2.1.1 Demography (overall)
- 2.1.2 Demography (Stratum CCC Absent)
- 2.1.3 Demography (Stratum CCC Present)
- 2.2.1 Vital signs (Blood Pressure and ECG (overall)
- 2.2.2 Vital signs (Blood Pressure and ECG (Stratum CCC absent)
- 2.2.3 Vital signs (Blood Pressure and ECG (Stratum CCC Present)
- 2.3.1 TKV and height-adjusted TKV at Visit 2 (Month 0) – Overall
- 2.3.2 TKV and height-adjusted TKV at Visit 2 (Month 0) – Stratum CCC Absent
- 2.3.3 TKV and height-adjusted TKV at Visit 2 (Month 0) – Stratum CCC Present
- 2.4.1 Measured Glomerular Filtration Rate at Visit 2 (Month 0) – Overall
- 2.4.2 Measured Glomerular Filtration Rate at Visit 2 (Month 0) – Stratum CCC Absent
- 2.4.3 Measured Glomerular Filtration Rate at Visit 2 (Month 0) – Stratum CCC Present
- 2.5.1 Estimated (MDRD) GFR at Visit 2 (Month 0) – Overall
- 2.5.2 Estimated (MDRD) GFR at Visit 2 (Month 0) – Stratum CCC Absent
- 2.5.3 Estimated (MDRD) GFR at Visit 2 (Month 0) – Stratum CCC Present
- 2.6.1 Estimated (CKD-EPI) GFR at Visit 2 (Month 0) – Overall
- 2.6.2 Estimated (CKD-EPI) GFR at Visit 2 (Month 0) – Stratum CCC Absent
- 2.6.3 Estimated (CKD\_EPI) GFR at Visit 2 (Month 0) – Stratum CCC Present
- 2.7.1 Serum Creatinine at Visit 2 (Month 0) – Overall
- 2.7.2 Serum Creatinine at Visit 2 (Month 0) – Stratum CCC Absent
- 2.7.3 Serum Creatinine at Visit 2 (Month 0) – Stratum CCC Present
- 2.8.1 Hematochemistry at Visit 2 (Month 0)(up to Table 2.24.3)

- 2.25.1 Lipid Profile at Visit 2 (Month 0) (up to Table 2.28.3)
- 2.29.1 Hemochrome at Visit 2 (Month 0) (up to Table 2.33.3)
- 2.34.1 24 Hours Urine Collection at Visit 2 (Month 0) (up to Table 2.41.3)
- 2.42.1 Spot Morning Urine at Visit 2 (Month 0) (up to Table 2.46.3)
- 2.47.1 Previous Diseases (up to Table 2.47.3)
- 2.48.1 Previous Medication/Non-Drug Therapy (up to Table 2.48.3)
- 2.49.1 Concomitant Diseases (up to Table 2.49.3)
- 2.50.1 Concomitant Medication/Non-Drug Therapy (up to Table 2.50.3)
- 3.1.1.1 One Year Primary Efficacy Parameter: TKV
- 3.1.1.2 Three Year Primary Efficacy Parameter: TKV
- 3.3.1 Blood Pressure, Pulse Rate and Weight (up to Table 3.7.3)
- 3.8.3 Serum Creatinine ((up to Table 3.8.3)
- 3.9.1 Hematochemistry (up to Table 3.25.3)
- 3.26.1 Creatinine Clearance (up to Table 3.26.3)
- 3.27.1 24 Hours Urine Collection (up to Table 3.33.3)
- 3.34.1 Spot Morning Urine (up to Table 3.38. 3)
- 3.39.1 TKV and absolute and percent changes in TKV (up to Table 3.39.3)
- 3.40.1 htTKV and absolute and percent changes in htTKV (up to Table 3.40.3)
- 3.41.1 Lipid Profile (up to Table 3.44.3)
- 3.45.1 Hemochrome (up to Table 3.49.3)
- 3.50.1 Total slope of  $eGFR_{\text{mdrd}}$  and  $Egfr_{\text{ckd-epi}}$  (up to Table 3.51.3)
- 3.52 Chronic slope of  $eGFR_{\text{mdrd}}$  and  $Egfr_{\text{ckd-epi}}$  (up to Table 3.53)
- 3.53.1 Time to ESRD and time to composite endpoint (up to Table 3.54.3)
- 3.55.1 Overall, Cardiovascular and Non-cardiovascular Mortality (up to Table 3.57.3)
- 3.58.1 Incidence of Major Cardiovascular Event (up to Table 3.58.2)
- 4.1 Summary of Adverse Events
- 4.2 Summary of Serious Adverse Events
- 4.3 Frequency of Adverse Events by Body System and Preferred Term
- 4.4 Frequency of Serious Adverse Events by Body System and Preferred Term
- 4.5 Death
- 4.6 Laboratory Tests at Baseline (Visit 2 - Month 0)
- 4.7 Laboratory Test Shift Table – Creatinine (mg/dl)
- 4.8 Laboratory Test Shift Table – Urea (mg/dl)
- 4.9 Laboratory Test Shift Table – Calcium (mg/dl)

- 4.10 Laboratory Test Shift Table – Sodium (mEq/l)
- 4.11 Laboratory Test Shift Table – Potassium (mEq/l)
- 4.12 Laboratory Test Shift Table – Phosphorous (mg/dl)
- 4.13 Summary Statistics for Change from Baseline – Creatinine (mg/dl)
- 4.14 Summary Statistics for Change from Baseline – Urea (mg/dl)
- 4.15 Summary Statistics for Change from Baseline – Calcium (mg/dl)
- 4.16 Summary Statistics for Change from Baseline – Sodium (mEq/l)
- 4.17 Summary Statistics for Change from Baseline – Potassium (mEq/l)
- 4.18 Summary Statistics for Change from Baseline – Phosphorous (mg/dl)
- 4.19 Urine Analysis Shift Table – Leukocytes
- 4.20 Urine Analysis Shift Table – Nitrates
- 4.21 Urine Analysis Shift Table – Ketones
- 4.22 Urine Analysis Shift Table – pH
- 4.23 Urine Analysis Shift Table – Glucose
- 4.24 Change From Baseline serum creatinine
- 4.25 Urine Analysis Shift Table – Hb
- 4.26 Urine Analysis Shift Table – Proteins
- 4.27 ECG Shift Table

## SECTION 5

### PROPOSED FIGURES

---

1. Kaplan-Meier Curves for ESRD
2. Kaplan-Meier Curves for Doubling of Serum Creatinine or ESRD
3. Kaplan-Meier Curves for Time to Overall Mortality
4. Kaplan-Meier Curves for Time to Cardiovascular Mortality
5. Kaplan-Meier Curves for Time to Non-cardiovascular Mortality
6. Kaplan-Meier Curves for Time to First Major Cardiovascular Event

*These graphs will be produced for both the Full Analysis Set and Per Protocol Set and according to Stratum CCC absent and to Stratum CCC present.*

## SECTION 6

### **PROPOSED APPENDICES**

---

1. Case Report Form
2. Quality of Life and Health and labour Questionnaire
3. Study Flow Chart
4. Trial-End Summary
5. Protocol Violations
6. Demographic Data
7. Previous Disease
8. Concomitant Disease
9. Previous Medication/Non-drug Therapy
10. Concomitant Medication/Non-drug Therapy
11. Temporary Withdrawal
12. Time to ESRD
13. Time to doubling of serum creatinine or ESRD
14. Time to overall mortality
15. Time to cardiovascular mortality
16. Time to non-cardiovascular mortality
17. Time to First Major cardiovascular event
18. Adverse events
19. Laboratory data
20. Urine analysis
21. Randomization details

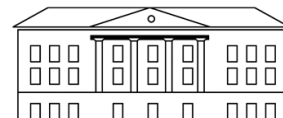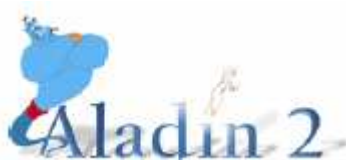

**A prospective, randomized, double-blind, placebo controlled clinical trial to assess the effects of long-acting somatostatin (octreotide Lar) therapy on disease progression in patients with autosomal dominant polycystic kidney disease and moderate to severe renal insufficiency (ALADIN 2 Study)**

## **Electronic Case Report Form**

**September 16<sup>th</sup>, 2011**

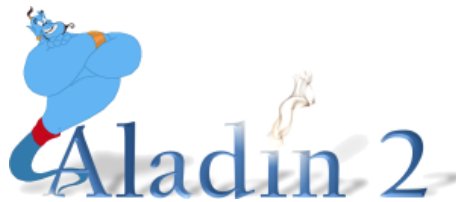

# BASELINE DATA FORM DATA SUMMARY

USER: Nadia Rubis

CENTER: -

PATIENT NUMBER: 666-01

VISIT: v01

ROW:

VISIT DATE: No date

| FIELD                           | VALUE |
|---------------------------------|-------|
| Written Informed Consent        |       |
| Date of Informed Consent        |       |
| Birth Date                      |       |
| Gender                          |       |
| Height(cm)                      |       |
| Race                            |       |
| Other Race                      |       |
| Smoke                           |       |
| Cigarettes/Day                  |       |
| Current Smoker Since            |       |
| Former Smoker Since             |       |
| Former Smoker To                |       |
| Alcohol                         |       |
| Coffee/Tea                      |       |
| Marital Status                  |       |
| Education                       |       |
| Professional Status             |       |
| Childbearing Potential          |       |
| Diabetes Mellitus               |       |
| Arterial Hypertension           |       |
| Coronary Heart Disease          |       |
| Polycystic Kidney Disease       |       |
| Other Renal Disease             |       |
| Cerebrovascular Disease         |       |
| Other Relevant Diseases         |       |
| Other Relevant Diseases Specify |       |

INSERTED ON: 2011-10-10 14:45:26

BY: Demo Demo

LOCKED: NO

PRINTED ON: 2011-10-10 15:36:42

BY: Nadia Rubis



PREVIOUS DISEASES FORM DATA SUMMARY

USER: Nadia Rubis

CENTER: -

PATIENT NUMBER: 666-01

VISIT: v01

ROW: 1

VISIT DATE: No date

| FIELD                 | VALUE |
|-----------------------|-------|
| Disease               |       |
| Onset Date            |       |
| Onset Date Unknown    | No    |
| Resolved Date         |       |
| Resolved Date Unknown | No    |
| Resolved Date Ongoing | No    |

INSERTED ON: 2011-10-10 14:45:33

BY: Demo Demo

LOCKED: NO

PRINTED ON: 2011-10-10 15:36:42

BY: Nadia Rubis

|                        |            |        |                     |
|------------------------|------------|--------|---------------------|
| PATIENT NUMBER: 666-01 | VISIT: v01 | ROW: 2 | VISIT DATE: No date |
|------------------------|------------|--------|---------------------|

  

| FIELD                 | VALUE |
|-----------------------|-------|
| Disease               |       |
| Onset Date            |       |
| Onset Date Unknown    | No    |
| Resolved Date         |       |
| Resolved Date Unknown | No    |
| Resolved Date Ongoing | No    |

  

|                                  |                 |            |
|----------------------------------|-----------------|------------|
| INSERTED ON: 2011-10-10 14:45:38 | BY: Demo Demo   | LOCKED: NO |
| PRINTED ON: 2011-10-10 15:36:42  | BY: Nadia Rubis |            |

|                                  |                 |        |                     |
|----------------------------------|-----------------|--------|---------------------|
| PATIENT NUMBER: 666-01           | VISIT: v01      | ROW: 3 | VISIT DATE: No date |
|                                  |                 |        |                     |
| FIELD                            |                 |        | VALUE               |
| Disease                          |                 |        |                     |
| Onset Date                       |                 |        |                     |
| Onset Date Unknown               |                 |        | No                  |
| Resolved Date                    |                 |        |                     |
| Resolved Date Unknown            |                 |        | No                  |
| Resolved Date Ongoing            |                 |        | No                  |
|                                  |                 |        |                     |
| INSERTED ON: 2011-10-10 14:45:43 | BY: Demo Demo   |        | LOCKED: NO          |
| PRINTED ON: 2011-10-10 15:36:42  | BY: Nadia Rubis |        |                     |

|                                  |                 |        |                     |
|----------------------------------|-----------------|--------|---------------------|
| PATIENT NUMBER: 666-01           | VISIT: v01      | ROW: 4 | VISIT DATE: No date |
| FIELD                            |                 |        | VALUE               |
| Disease                          |                 |        |                     |
| Onset Date                       |                 |        |                     |
| Onset Date Unknown               |                 |        | No                  |
| Resolved Date                    |                 |        |                     |
| Resolved Date Unknown            |                 |        | No                  |
| Resolved Date Ongoing            |                 |        | No                  |
| INSERTED ON: 2011-10-10 14:45:47 | BY: Demo Demo   |        | LOCKED: NO          |
| PRINTED ON: 2011-10-10 15:36:42  | BY: Nadia Rubis |        |                     |

|                                  |                 |        |                     |
|----------------------------------|-----------------|--------|---------------------|
| PATIENT NUMBER: 666-01           | VISIT: v01      | ROW: 5 | VISIT DATE: No date |
|                                  |                 |        |                     |
| FIELD                            |                 |        | VALUE               |
| Disease                          |                 |        |                     |
| Onset Date                       |                 |        |                     |
| Onset Date Unknown               |                 |        | No                  |
| Resolved Date                    |                 |        |                     |
| Resolved Date Unknown            |                 |        | No                  |
| Resolved Date Ongoing            |                 |        | No                  |
|                                  |                 |        |                     |
| INSERTED ON: 2011-10-10 14:45:51 | BY: Demo Demo   |        | LOCKED: NO          |
| PRINTED ON: 2011-10-10 15:36:42  | BY: Nadia Rubis |        |                     |



# PREVIOUS TREATMENTS FORM DATA SUMMARY

USER: Nadia Rubis

CENTER: -

PATIENT NUMBER: 666-01

VISIT: v01

ROW: 1

VISIT DATE: No date

| FIELD                     | VALUE |
|---------------------------|-------|
| Treatment                 |       |
| First Intake Date         |       |
| First Intake Date Unknown | No    |
| Last Intake Date          |       |
| Last Intake Date Unknown  | No    |
| Last Intake Date Ongoing  | No    |
| Dose                      |       |
| Schedule                  |       |
| Route                     |       |
| Disease                   |       |

INSERTED ON: 2011-10-10 14:46:01

BY: Demo Demo

LOCKED: NO

PRINTED ON: 2011-10-10 15:36:42

BY: Nadia Rubis

|                        |            |        |                     |
|------------------------|------------|--------|---------------------|
| PATIENT NUMBER: 666-01 | VISIT: v01 | ROW: 2 | VISIT DATE: No date |
|------------------------|------------|--------|---------------------|

| FIELD                     | VALUE |
|---------------------------|-------|
| Treatment                 |       |
| First Intake Date         |       |
| First Intake Date Unknown | No    |
| Last Intake Date          |       |
| Last Intake Date Unknown  | No    |
| Last Intake Date Ongoing  | No    |
| Dose                      |       |
| Schedule                  |       |
| Route                     |       |
| Disease                   |       |

|                                  |                 |            |
|----------------------------------|-----------------|------------|
| INSERTED ON: 2011-10-10 14:46:06 | BY: Demo Demo   | LOCKED: NO |
| PRINTED ON: 2011-10-10 15:36:42  | BY: Nadia Rubis |            |

|                        |            |        |                     |
|------------------------|------------|--------|---------------------|
| PATIENT NUMBER: 666-01 | VISIT: v01 | ROW: 3 | VISIT DATE: No date |
|------------------------|------------|--------|---------------------|

  

| FIELD                     | VALUE |
|---------------------------|-------|
| Treatment                 |       |
| First Intake Date         |       |
| First Intake Date Unknown | No    |
| Last Intake Date          |       |
| Last Intake Date Unknown  | No    |
| Last Intake Date Ongoing  | No    |
| Dose                      |       |
| Schedule                  |       |
| Route                     |       |
| Disease                   |       |

  

|                                  |                 |            |
|----------------------------------|-----------------|------------|
| INSERTED ON: 2011-10-10 14:46:10 | BY: Demo Demo   | LOCKED: NO |
| PRINTED ON: 2011-10-10 15:36:42  | BY: Nadia Rubis |            |

|                        |            |        |                     |
|------------------------|------------|--------|---------------------|
| PATIENT NUMBER: 666-01 | VISIT: v01 | ROW: 4 | VISIT DATE: No date |
|------------------------|------------|--------|---------------------|

  

| FIELD                     | VALUE |
|---------------------------|-------|
| Treatment                 |       |
| First Intake Date         |       |
| First Intake Date Unknown | No    |
| Last Intake Date          |       |
| Last Intake Date Unknown  | No    |
| Last Intake Date Ongoing  | No    |
| Dose                      |       |
| Schedule                  |       |
| Route                     |       |
| Disease                   |       |

  

|                                  |                 |            |
|----------------------------------|-----------------|------------|
| INSERTED ON: 2011-10-10 14:46:15 | BY: Demo Demo   | LOCKED: NO |
| PRINTED ON: 2011-10-10 15:36:42  | BY: Nadia Rubis |            |

|                        |            |        |                     |
|------------------------|------------|--------|---------------------|
| PATIENT NUMBER: 666-01 | VISIT: v01 | ROW: 5 | VISIT DATE: No date |
|------------------------|------------|--------|---------------------|

  

| FIELD                     | VALUE |
|---------------------------|-------|
| Treatment                 |       |
| First Intake Date         |       |
| First Intake Date Unknown | No    |
| Last Intake Date          |       |
| Last Intake Date Unknown  | No    |
| Last Intake Date Ongoing  | No    |
| Dose                      |       |
| Schedule                  |       |
| Route                     |       |
| Disease                   |       |

  

|                                  |                 |            |
|----------------------------------|-----------------|------------|
| INSERTED ON: 2011-10-10 14:46:20 | BY: Demo Demo   | LOCKED: NO |
| PRINTED ON: 2011-10-10 15:36:42  | BY: Nadia Rubis |            |



# PHYSICAL EXAMINATION FORM DATA SUMMARY

USER: Nadia Rubis

CENTER: -

PATIENT NUMBER: 666-01

VISIT: v02

ROW:

VISIT DATE: No date

| FIELD                                                                         | VALUE |
|-------------------------------------------------------------------------------|-------|
| Visit Date                                                                    |       |
| Date of Physical Examination                                                  |       |
| Were there any pathological results observed within the physical examination? |       |
| Date of Measurement                                                           |       |
| Systolic(mmHg)-Value 1                                                        |       |
| Diastolic(mmHg)-Value 1                                                       |       |
| Pulse Rate(bpm)-Value 1                                                       |       |
| Systolic(mmHg)-Value 2                                                        |       |
| Diastolic(mmHg)-Value 2                                                       |       |
| Pulse Rate(bpm)-Value 2                                                       |       |
| Systolic(mmHg)-Value 3                                                        |       |
| Diastolic(mmHg)-Value 3                                                       |       |
| Pulse Rate(bpm)-Value 3                                                       |       |
| Systolic Mean (mmHg)                                                          | 0     |
| Diastolic Mean (mmHg)                                                         | 0     |
| Pulse Rate Mean (bpm)                                                         | 0     |
| Weight (kg)                                                                   |       |

INSERTED ON: 2011-10-10 14:46:27

BY: Demo Demo

LOCKED: NO

PRINTED ON: 2011-10-10 15:36:42

BY: Nadia Rubis

|                        |            |      |                     |
|------------------------|------------|------|---------------------|
| PATIENT NUMBER: 666-01 | VISIT: v03 | ROW: | VISIT DATE: No date |
|------------------------|------------|------|---------------------|

  

| FIELD                                                                         | VALUE |
|-------------------------------------------------------------------------------|-------|
| Visit Date                                                                    |       |
| Date of Physical Examination                                                  |       |
| Were there any pathological results observed within the physical examination? |       |
| Date of Measurement                                                           |       |
| Systolic(mmHg)-Value 1                                                        |       |
| Diastolic(mmHg)-Value 1                                                       |       |
| Pulse Rate(bpm)-Value 1                                                       |       |
| Systolic(mmHg)-Value 2                                                        |       |
| Diastolic(mmHg)-Value 2                                                       |       |
| Pulse Rate(bpm)-Value 2                                                       |       |
| Systolic(mmHg)-Value 3                                                        |       |
| Diastolic(mmHg)-Value 3                                                       |       |
| Pulse Rate(bpm)-Value 3                                                       |       |
| Systolic Mean (mmHg)                                                          | 0     |
| Diastolic Mean (mmHg)                                                         | 0     |
| Pulse Rate Mean (bpm)                                                         | 0     |
| Weight (kg)                                                                   |       |

  

|                                  |                 |            |
|----------------------------------|-----------------|------------|
| INSERTED ON: 2011-10-10 14:46:32 | BY: Demo Demo   | LOCKED: NO |
| PRINTED ON: 2011-10-10 15:36:42  | BY: Nadia Rubis |            |

|                        |            |      |                     |
|------------------------|------------|------|---------------------|
| PATIENT NUMBER: 666-01 | VISIT: v04 | ROW: | VISIT DATE: No date |
|------------------------|------------|------|---------------------|

  

| FIELD                                                                         | VALUE |
|-------------------------------------------------------------------------------|-------|
| Visit Date                                                                    |       |
| Date of Physical Examination                                                  |       |
| Were there any pathological results observed within the physical examination? |       |
| Date of Measurement                                                           |       |
| Systolic(mmHg)-Value 1                                                        |       |
| Diastolic(mmHg)-Value 1                                                       |       |
| Pulse Rate(bpm)-Value 1                                                       |       |
| Systolic(mmHg)-Value 2                                                        |       |
| Diastolic(mmHg)-Value 2                                                       |       |
| Pulse Rate(bpm)-Value 2                                                       |       |
| Systolic(mmHg)-Value 3                                                        |       |
| Diastolic(mmHg)-Value 3                                                       |       |
| Pulse Rate(bpm)-Value 3                                                       |       |
| Systolic Mean (mmHg)                                                          | 0     |
| Diastolic Mean (mmHg)                                                         | 0     |
| Pulse Rate Mean (bpm)                                                         | 0     |
| Weight (kg)                                                                   |       |

  

|                                  |                 |            |
|----------------------------------|-----------------|------------|
| INSERTED ON: 2011-10-10 14:46:36 | BY: Demo Demo   | LOCKED: NO |
| PRINTED ON: 2011-10-10 15:36:42  | BY: Nadia Rubis |            |

|                        |            |      |                     |
|------------------------|------------|------|---------------------|
| PATIENT NUMBER: 666-01 | VISIT: v05 | ROW: | VISIT DATE: No date |
|------------------------|------------|------|---------------------|

  

| FIELD                                                                         | VALUE |
|-------------------------------------------------------------------------------|-------|
| Visit Date                                                                    |       |
| Date of Physical Examination                                                  |       |
| Were there any pathological results observed within the physical examination? |       |
| Date of Measurement                                                           |       |
| Systolic(mmHg)-Value 1                                                        |       |
| Diastolic(mmHg)-Value 1                                                       |       |
| Pulse Rate(bpm)-Value 1                                                       |       |
| Systolic(mmHg)-Value 2                                                        |       |
| Diastolic(mmHg)-Value 2                                                       |       |
| Pulse Rate(bpm)-Value 2                                                       |       |
| Systolic(mmHg)-Value 3                                                        |       |
| Diastolic(mmHg)-Value 3                                                       |       |
| Pulse Rate(bpm)-Value 3                                                       |       |
| Systolic Mean (mmHg)                                                          | 0     |
| Diastolic Mean (mmHg)                                                         | 0     |
| Pulse Rate Mean (bpm)                                                         | 0     |
| Weight (kg)                                                                   |       |

  

|                                  |                 |            |
|----------------------------------|-----------------|------------|
| INSERTED ON: 2011-10-10 14:46:40 | BY: Demo Demo   | LOCKED: NO |
| PRINTED ON: 2011-10-10 15:36:42  | BY: Nadia Rubis |            |

|                        |            |      |                     |
|------------------------|------------|------|---------------------|
| PATIENT NUMBER: 666-01 | VISIT: v06 | ROW: | VISIT DATE: No date |
|------------------------|------------|------|---------------------|

  

| FIELD                                                                         | VALUE |
|-------------------------------------------------------------------------------|-------|
| Visit Date                                                                    |       |
| Date of Physical Examination                                                  |       |
| Were there any pathological results observed within the physical examination? |       |
| Date of Measurement                                                           |       |
| Systolic(mmHg)-Value 1                                                        |       |
| Diastolic(mmHg)-Value 1                                                       |       |
| Pulse Rate(bpm)-Value 1                                                       |       |
| Systolic(mmHg)-Value 2                                                        |       |
| Diastolic(mmHg)-Value 2                                                       |       |
| Pulse Rate(bpm)-Value 2                                                       |       |
| Systolic(mmHg)-Value 3                                                        |       |
| Diastolic(mmHg)-Value 3                                                       |       |
| Pulse Rate(bpm)-Value 3                                                       |       |
| Systolic Mean (mmHg)                                                          | 0     |
| Diastolic Mean (mmHg)                                                         | 0     |
| Pulse Rate Mean (bpm)                                                         | 0     |
| Weight (kg)                                                                   |       |

  

|                                  |                 |            |
|----------------------------------|-----------------|------------|
| INSERTED ON: 2011-10-10 14:46:44 | BY: Demo Demo   | LOCKED: NO |
| PRINTED ON: 2011-10-10 15:36:42  | BY: Nadia Rubis |            |

|                        |            |      |                     |
|------------------------|------------|------|---------------------|
| PATIENT NUMBER: 666-01 | VISIT: v07 | ROW: | VISIT DATE: No date |
|------------------------|------------|------|---------------------|

  

| FIELD                                                                         | VALUE |
|-------------------------------------------------------------------------------|-------|
| Visit Date                                                                    |       |
| Date of Physical Examination                                                  |       |
| Were there any pathological results observed within the physical examination? |       |
| Date of Measurement                                                           |       |
| Systolic(mmHg)-Value 1                                                        |       |
| Diastolic(mmHg)-Value 1                                                       |       |
| Pulse Rate(bpm)-Value 1                                                       |       |
| Systolic(mmHg)-Value 2                                                        |       |
| Diastolic(mmHg)-Value 2                                                       |       |
| Pulse Rate(bpm)-Value 2                                                       |       |
| Systolic(mmHg)-Value 3                                                        |       |
| Diastolic(mmHg)-Value 3                                                       |       |
| Pulse Rate(bpm)-Value 3                                                       |       |
| Systolic Mean (mmHg)                                                          | 0     |
| Diastolic Mean (mmHg)                                                         | 0     |
| Pulse Rate Mean (bpm)                                                         | 0     |
| Weight (kg)                                                                   |       |

  

|                                  |                 |            |
|----------------------------------|-----------------|------------|
| INSERTED ON: 2011-10-10 14:46:48 | BY: Demo Demo   | LOCKED: NO |
| PRINTED ON: 2011-10-10 15:36:42  | BY: Nadia Rubis |            |

|                        |            |      |                     |
|------------------------|------------|------|---------------------|
| PATIENT NUMBER: 666-01 | VISIT: v08 | ROW: | VISIT DATE: No date |
|------------------------|------------|------|---------------------|

  

| FIELD                                                                         | VALUE |
|-------------------------------------------------------------------------------|-------|
| Visit Date                                                                    |       |
| Date of Physical Examination                                                  |       |
| Were there any pathological results observed within the physical examination? |       |
| Date of Measurement                                                           |       |
| Systolic(mmHg)-Value 1                                                        |       |
| Diastolic(mmHg)-Value 1                                                       |       |
| Pulse Rate(bpm)-Value 1                                                       |       |
| Systolic(mmHg)-Value 2                                                        |       |
| Diastolic(mmHg)-Value 2                                                       |       |
| Pulse Rate(bpm)-Value 2                                                       |       |
| Systolic(mmHg)-Value 3                                                        |       |
| Diastolic(mmHg)-Value 3                                                       |       |
| Pulse Rate(bpm)-Value 3                                                       |       |
| Systolic Mean (mmHg)                                                          | 0     |
| Diastolic Mean (mmHg)                                                         | 0     |
| Pulse Rate Mean (bpm)                                                         | 0     |
| Weight (kg)                                                                   |       |

  

|                                  |                 |            |
|----------------------------------|-----------------|------------|
| INSERTED ON: 2011-10-10 14:46:53 | BY: Demo Demo   | LOCKED: NO |
| PRINTED ON: 2011-10-10 15:36:42  | BY: Nadia Rubis |            |

|                        |            |      |                     |
|------------------------|------------|------|---------------------|
| PATIENT NUMBER: 666-01 | VISIT: v09 | ROW: | VISIT DATE: No date |
|------------------------|------------|------|---------------------|

  

| FIELD                                                                         | VALUE |
|-------------------------------------------------------------------------------|-------|
| Visit Date                                                                    |       |
| Date of Physical Examination                                                  |       |
| Were there any pathological results observed within the physical examination? |       |
| Date of Measurement                                                           |       |
| Systolic(mmHg)-Value 1                                                        |       |
| Diastolic(mmHg)-Value 1                                                       |       |
| Pulse Rate(bpm)-Value 1                                                       |       |
| Systolic(mmHg)-Value 2                                                        |       |
| Diastolic(mmHg)-Value 2                                                       |       |
| Pulse Rate(bpm)-Value 2                                                       |       |
| Systolic(mmHg)-Value 3                                                        |       |
| Diastolic(mmHg)-Value 3                                                       |       |
| Pulse Rate(bpm)-Value 3                                                       |       |
| Systolic Mean (mmHg)                                                          | 0     |
| Diastolic Mean (mmHg)                                                         | 0     |
| Pulse Rate Mean (bpm)                                                         | 0     |
| Weight (kg)                                                                   |       |

  

|                                  |                 |            |
|----------------------------------|-----------------|------------|
| INSERTED ON: 2011-10-10 14:46:57 | BY: Demo Demo   | LOCKED: NO |
| PRINTED ON: 2011-10-10 15:36:42  | BY: Nadia Rubis |            |

|                        |            |      |                     |
|------------------------|------------|------|---------------------|
| PATIENT NUMBER: 666-01 | VISIT: v10 | ROW: | VISIT DATE: No date |
|------------------------|------------|------|---------------------|

  

| FIELD                                                                         | VALUE |
|-------------------------------------------------------------------------------|-------|
| Visit Date                                                                    |       |
| Date of Physical Examination                                                  |       |
| Were there any pathological results observed within the physical examination? |       |
| Date of Measurement                                                           |       |
| Systolic(mmHg)-Value 1                                                        |       |
| Diastolic(mmHg)-Value 1                                                       |       |
| Pulse Rate(bpm)-Value 1                                                       |       |
| Systolic(mmHg)-Value 2                                                        |       |
| Diastolic(mmHg)-Value 2                                                       |       |
| Pulse Rate(bpm)-Value 2                                                       |       |
| Systolic(mmHg)-Value 3                                                        |       |
| Diastolic(mmHg)-Value 3                                                       |       |
| Pulse Rate(bpm)-Value 3                                                       |       |
| Systolic Mean (mmHg)                                                          | 0     |
| Diastolic Mean (mmHg)                                                         | 0     |
| Pulse Rate Mean (bpm)                                                         | 0     |
| Weight (kg)                                                                   |       |

  

|                                  |                 |            |
|----------------------------------|-----------------|------------|
| INSERTED ON: 2011-10-10 14:47:02 | BY: Demo Demo   | LOCKED: NO |
| PRINTED ON: 2011-10-10 15:36:42  | BY: Nadia Rubis |            |

|                        |            |      |                     |
|------------------------|------------|------|---------------------|
| PATIENT NUMBER: 666-01 | VISIT: v11 | ROW: | VISIT DATE: No date |
|------------------------|------------|------|---------------------|

  

| FIELD                                                                         | VALUE |
|-------------------------------------------------------------------------------|-------|
| Visit Date                                                                    |       |
| Date of Physical Examination                                                  |       |
| Were there any pathological results observed within the physical examination? |       |
| Date of Measurement                                                           |       |
| Systolic(mmHg)-Value 1                                                        |       |
| Diastolic(mmHg)-Value 1                                                       |       |
| Pulse Rate(bpm)-Value 1                                                       |       |
| Systolic(mmHg)-Value 2                                                        |       |
| Diastolic(mmHg)-Value 2                                                       |       |
| Pulse Rate(bpm)-Value 2                                                       |       |
| Systolic(mmHg)-Value 3                                                        |       |
| Diastolic(mmHg)-Value 3                                                       |       |
| Pulse Rate(bpm)-Value 3                                                       |       |
| Systolic Mean (mmHg)                                                          | 0     |
| Diastolic Mean (mmHg)                                                         | 0     |
| Pulse Rate Mean (bpm)                                                         | 0     |
| Weight (kg)                                                                   |       |

  

|                                  |                 |            |
|----------------------------------|-----------------|------------|
| INSERTED ON: 2011-10-10 14:47:06 | BY: Demo Demo   | LOCKED: NO |
| PRINTED ON: 2011-10-10 15:36:42  | BY: Nadia Rubis |            |

|                        |            |      |                     |
|------------------------|------------|------|---------------------|
| PATIENT NUMBER: 666-01 | VISIT: v12 | ROW: | VISIT DATE: No date |
|------------------------|------------|------|---------------------|

  

| FIELD                                                                         | VALUE |
|-------------------------------------------------------------------------------|-------|
| Visit Date                                                                    |       |
| Date of Physical Examination                                                  |       |
| Were there any pathological results observed within the physical examination? |       |
| Date of Measurement                                                           |       |
| Systolic(mmHg)-Value 1                                                        |       |
| Diastolic(mmHg)-Value 1                                                       |       |
| Pulse Rate(bpm)-Value 1                                                       |       |
| Systolic(mmHg)-Value 2                                                        |       |
| Diastolic(mmHg)-Value 2                                                       |       |
| Pulse Rate(bpm)-Value 2                                                       |       |
| Systolic(mmHg)-Value 3                                                        |       |
| Diastolic(mmHg)-Value 3                                                       |       |
| Pulse Rate(bpm)-Value 3                                                       |       |
| Systolic Mean (mmHg)                                                          | 0     |
| Diastolic Mean (mmHg)                                                         | 0     |
| Pulse Rate Mean (bpm)                                                         | 0     |
| Weight (kg)                                                                   |       |

  

|                                  |                 |            |
|----------------------------------|-----------------|------------|
| INSERTED ON: 2011-10-10 14:47:10 | BY: Demo Demo   | LOCKED: NO |
| PRINTED ON: 2011-10-10 15:36:42  | BY: Nadia Rubis |            |

|                        |            |      |                     |
|------------------------|------------|------|---------------------|
| PATIENT NUMBER: 666-01 | VISIT: v13 | ROW: | VISIT DATE: No date |
|------------------------|------------|------|---------------------|

  

| FIELD                                                                         | VALUE |
|-------------------------------------------------------------------------------|-------|
| Visit Date                                                                    |       |
| Date of Physical Examination                                                  |       |
| Were there any pathological results observed within the physical examination? |       |
| Date of Measurement                                                           |       |
| Systolic(mmHg)-Value 1                                                        |       |
| Diastolic(mmHg)-Value 1                                                       |       |
| Pulse Rate(bpm)-Value 1                                                       |       |
| Systolic(mmHg)-Value 2                                                        |       |
| Diastolic(mmHg)-Value 2                                                       |       |
| Pulse Rate(bpm)-Value 2                                                       |       |
| Systolic(mmHg)-Value 3                                                        |       |
| Diastolic(mmHg)-Value 3                                                       |       |
| Pulse Rate(bpm)-Value 3                                                       |       |
| Systolic Mean (mmHg)                                                          | 0     |
| Diastolic Mean (mmHg)                                                         | 0     |
| Pulse Rate Mean (bpm)                                                         | 0     |
| Weight (kg)                                                                   |       |

  

|                                  |                 |            |
|----------------------------------|-----------------|------------|
| INSERTED ON: 2011-10-10 14:47:15 | BY: Demo Demo   | LOCKED: NO |
| PRINTED ON: 2011-10-10 15:36:42  | BY: Nadia Rubis |            |

|                        |            |      |                     |
|------------------------|------------|------|---------------------|
| PATIENT NUMBER: 666-01 | VISIT: v14 | ROW: | VISIT DATE: No date |
|------------------------|------------|------|---------------------|

  

| FIELD                                                                         | VALUE |
|-------------------------------------------------------------------------------|-------|
| Visit Date                                                                    |       |
| Date of Physical Examination                                                  |       |
| Were there any pathological results observed within the physical examination? |       |
| Date of Measurement                                                           |       |
| Systolic(mmHg)-Value 1                                                        |       |
| Diastolic(mmHg)-Value 1                                                       |       |
| Pulse Rate(bpm)-Value 1                                                       |       |
| Systolic(mmHg)-Value 2                                                        |       |
| Diastolic(mmHg)-Value 2                                                       |       |
| Pulse Rate(bpm)-Value 2                                                       |       |
| Systolic(mmHg)-Value 3                                                        |       |
| Diastolic(mmHg)-Value 3                                                       |       |
| Pulse Rate(bpm)-Value 3                                                       |       |
| Systolic Mean (mmHg)                                                          | 0     |
| Diastolic Mean (mmHg)                                                         | 0     |
| Pulse Rate Mean (bpm)                                                         | 0     |
| Weight (kg)                                                                   |       |

  

|                                  |                 |            |
|----------------------------------|-----------------|------------|
| INSERTED ON: 2011-10-10 14:47:20 | BY: Demo Demo   | LOCKED: NO |
| PRINTED ON: 2011-10-10 15:36:42  | BY: Nadia Rubis |            |



# BLOOD LABORATORY EXAMINATIONS FORM DATA SUMMARY

USER: Nadia Rubis

CENTER: -

PATIENT NUMBER: 666-01

VISIT: v02

ROW:

VISIT DATE: No date

| FIELD                           | VALUE |
|---------------------------------|-------|
| Date of Sample                  |       |
| Was the patient fasting or not? |       |
| Creatinine                      |       |
| Urea                            |       |
| BUN                             |       |
| Sodium                          |       |
| Potassium                       |       |
| Calcium                         |       |
| Phosphorus                      |       |
| GOT(AST)                        |       |
| GPT(ALT)                        |       |
| Alkaline Phosphatase            |       |
| Gamma GT                        |       |
| Total Bilirubin                 |       |
| Direct Bilirubin                |       |
| CPK                             |       |
| Glucose                         |       |
| HbA1c                           |       |
| Uric Acid                       |       |
| Total Cholesterol               |       |
| HDL Cholesterol                 |       |
| LDL Cholesterol                 |       |
| Triglycerides                   |       |
| Total Proteins                  |       |
| Albumin                         |       |
| IGF-1                           |       |
| Leukocytes                      |       |
| Platelets                       |       |
| Erythrocytes                    |       |
| Hemoglobin                      |       |
| Hematocrit                      |       |
| Creatinine Unit                 |       |
| Urea Unit                       |       |
| BUN Unit                        |       |

| BLOOD LABORATORY EXAMINATIONS FORM DATA SUMMARY |  |                     |      |
|-------------------------------------------------|--|---------------------|------|
| PATIENT NUMBER: 666-01                          |  | VISIT: v02          | ROW: |
|                                                 |  | VISIT DATE: No date |      |
| FIELD                                           |  | VALUE               |      |
| Sodium Unit                                     |  |                     |      |
| Potassium Unit                                  |  |                     |      |
| Calcium Unit                                    |  |                     |      |
| Phosphorus Unit                                 |  |                     |      |
| GOT(AST) Unit                                   |  |                     |      |
| GPT(ALT) Unit                                   |  |                     |      |
| Alkaline Phosphatase Unit                       |  |                     |      |
| Gamma GT Unit                                   |  |                     |      |
| Total Bilirubin Unit                            |  |                     |      |
| Direct Bilirubin Unit                           |  |                     |      |
| CPK Unit                                        |  |                     |      |
| Glucose Unit                                    |  |                     |      |
| HbA1c Unit                                      |  |                     |      |
| Uric Acid Unit                                  |  |                     |      |
| Total Cholesterol Unit                          |  |                     |      |
| HDL Cholesterol Unit                            |  |                     |      |
| LDL Cholesterol Unit                            |  |                     |      |
| Triglycerides Unit                              |  |                     |      |
| Total Proteins Unit                             |  |                     |      |
| Albumin Unit                                    |  |                     |      |
| IGF-1 Unit                                      |  |                     |      |
| Leukocytes Unit                                 |  |                     |      |
| Platelets Unit                                  |  |                     |      |
| Erythrocytes Unit                               |  |                     |      |
| Hemoglobin Unit                                 |  |                     |      |
| Hematocrit Unit                                 |  |                     |      |
| Creatinine Assessment                           |  |                     |      |
| Urea Assessment                                 |  |                     |      |
| BUN Assessment                                  |  |                     |      |
| Sodium Assessment                               |  |                     |      |
| Potassium Assessment                            |  |                     |      |
| Calcium Assessment                              |  |                     |      |
| Phosphorus Assessment                           |  |                     |      |
| GOT(AST) Assessment                             |  |                     |      |
| GPT(ALT) Assessment                             |  |                     |      |
| Alkaline Phosphatase Assessment                 |  |                     |      |
| Gamma GT Assessment                             |  |                     |      |
| Total Bilirubin Assessment                      |  |                     |      |
| Direct Bilirubin Assessment                     |  |                     |      |
| CPK Assessment                                  |  |                     |      |

| BLOOD LABORATORY EXAMINATIONS FORM DATA SUMMARY |  |                     |      |
|-------------------------------------------------|--|---------------------|------|
| PATIENT NUMBER: 666-01                          |  | VISIT: v02          | ROW: |
|                                                 |  | VISIT DATE: No date |      |

  

| FIELD                        | VALUE |
|------------------------------|-------|
| Glucose Assessment           |       |
| HbA1c Assessment             |       |
| Uric Acid Assessment         |       |
| Total Cholesterol Assessment |       |
| HDL Cholesterol Assessment   |       |
| LDL Cholesterol Assessment   |       |
| Triglycerides Assessment     |       |
| Total Proteins Assessment    |       |
| Albumin Assessment           |       |
| IGF-1 Assessment             |       |
| Leukocytes Assessment        |       |
| Platelets Assessment         |       |
| Erythrocytes Assessment      |       |
| Hemoglobin Assessment        |       |
| Hematocrit Assessment        |       |

  

|                                  |                 |            |
|----------------------------------|-----------------|------------|
| INSERTED ON: 2011-10-10 14:47:32 | BY: Demo Demo   | LOCKED: NO |
| PRINTED ON: 2011-10-10 15:36:42  | BY: Nadia Rubis |            |

|                        |            |      |                     |
|------------------------|------------|------|---------------------|
| PATIENT NUMBER: 666-01 | VISIT: v03 | ROW: | VISIT DATE: No date |
|------------------------|------------|------|---------------------|

| FIELD                           | VALUE |
|---------------------------------|-------|
| Date of Sample                  |       |
| Was the patient fasting or not? |       |
| Creatinine                      |       |
| Urea                            |       |
| BUN                             |       |
| Sodium                          |       |
| Potassium                       |       |
| Calcium                         |       |
| Phosphorus                      |       |
| GOT(AST)                        |       |
| GPT(ALT)                        |       |
| Alkaline Phosphatase            |       |
| Gamma GT                        |       |
| Total Bilirubin                 |       |
| Direct Bilirubin                |       |
| CPK                             |       |
| Glucose                         |       |
| HbA1c                           |       |
| Uric Acid                       |       |
| Total Cholesterol               |       |
| HDL Cholesterol                 |       |
| LDL Cholesterol                 |       |
| Triglycerides                   |       |
| Total Proteins                  |       |
| Albumin                         |       |
| IGF-1                           |       |
| Leukocytes                      |       |
| Platelets                       |       |
| Erythrocytes                    |       |
| Hemoglobin                      |       |
| Hematocrit                      |       |
| Creatinine Unit                 |       |
| Urea Unit                       |       |
| BUN Unit                        |       |
| Sodium Unit                     |       |
| Potassium Unit                  |       |
| Calcium Unit                    |       |
| Phosphorus Unit                 |       |
| GOT(AST) Unit                   |       |
| GPT(ALT) Unit                   |       |

| BLOOD LABORATORY EXAMINATIONS FORM DATA SUMMARY |            |       |                     |
|-------------------------------------------------|------------|-------|---------------------|
| PATIENT NUMBER: 666-01                          | VISIT: v03 | ROW:  | VISIT DATE: No date |
| FIELD                                           |            | VALUE |                     |
| Alkaline Phosphatase Unit                       |            |       |                     |
| Gamma GT Unit                                   |            |       |                     |
| Total Bilirubin Unit                            |            |       |                     |
| Direct Bilirubin Unit                           |            |       |                     |
| CPK Unit                                        |            |       |                     |
| Glucose Unit                                    |            |       |                     |
| HbA1c Unit                                      |            |       |                     |
| Uric Acid Unit                                  |            |       |                     |
| Total Cholesterol Unit                          |            |       |                     |
| HDL Cholesterol Unit                            |            |       |                     |
| LDL Cholesterol Unit                            |            |       |                     |
| Triglycerides Unit                              |            |       |                     |
| Total Proteins Unit                             |            |       |                     |
| Albumin Unit                                    |            |       |                     |
| IGF-1 Unit                                      |            |       |                     |
| Leukocytes Unit                                 |            |       |                     |
| Platelets Unit                                  |            |       |                     |
| Erythrocytes Unit                               |            |       |                     |
| Hemoglobin Unit                                 |            |       |                     |
| Hematocrit Unit                                 |            |       |                     |
| Creatinine Assessment                           |            |       |                     |
| Urea Assessment                                 |            |       |                     |
| BUN Assessment                                  |            |       |                     |
| Sodium Assessment                               |            |       |                     |
| Potassium Assessment                            |            |       |                     |
| Calcium Assessment                              |            |       |                     |
| Phosphorus Assessment                           |            |       |                     |
| GOT(AST) Assessment                             |            |       |                     |
| GPT(ALT) Assessment                             |            |       |                     |
| Alkaline Phosphatase Assessment                 |            |       |                     |
| Gamma GT Assessment                             |            |       |                     |
| Total Bilirubin Assessment                      |            |       |                     |
| Direct Bilirubin Assessment                     |            |       |                     |
| CPK Assessment                                  |            |       |                     |
| Glucose Assessment                              |            |       |                     |
| HbA1c Assessment                                |            |       |                     |
| Uric Acid Assessment                            |            |       |                     |
| Total Cholesterol Assessment                    |            |       |                     |
| HDL Cholesterol Assessment                      |            |       |                     |
| LDL Cholesterol Assessment                      |            |       |                     |

| BLOOD LABORATORY EXAMINATIONS FORM DATA SUMMARY |            |                 |                     |
|-------------------------------------------------|------------|-----------------|---------------------|
| PATIENT NUMBER: 666-01                          | VISIT: v03 | ROW:            | VISIT DATE: No date |
| FIELD                                           |            | VALUE           |                     |
| Triglycerides Assessment                        |            |                 |                     |
| Total Proteins Assessment                       |            |                 |                     |
| Albumin Assessment                              |            |                 |                     |
| IGF-1 Assessment                                |            |                 |                     |
| Leukocytes Assessment                           |            |                 |                     |
| Platelets Assessment                            |            |                 |                     |
| Erythrocytes Assessment                         |            |                 |                     |
| Hemoglobin Assessment                           |            |                 |                     |
| Hematocrit Assessment                           |            |                 |                     |
| INSERTED ON: 2011-10-10 14:47:37                |            | BY: Demo Demo   | LOCKED: NO          |
| PRINTED ON: 2011-10-10 15:36:42                 |            | BY: Nadia Rubis |                     |

|                        |            |      |                     |
|------------------------|------------|------|---------------------|
| PATIENT NUMBER: 666-01 | VISIT: v04 | ROW: | VISIT DATE: No date |
|------------------------|------------|------|---------------------|

| FIELD                           | VALUE |
|---------------------------------|-------|
| Date of Sample                  |       |
| Was the patient fasting or not? |       |
| Creatinine                      |       |
| Urea                            |       |
| BUN                             |       |
| Sodium                          |       |
| Potassium                       |       |
| Calcium                         |       |
| Phosphorus                      |       |
| GOT(AST)                        |       |
| GPT(ALT)                        |       |
| Alkaline Phosphatase            |       |
| Gamma GT                        |       |
| Total Bilirubin                 |       |
| Direct Bilirubin                |       |
| CPK                             |       |
| Glucose                         |       |
| HbA1c                           |       |
| Uric Acid                       |       |
| Total Cholesterol               |       |
| HDL Cholesterol                 |       |
| LDL Cholesterol                 |       |
| Triglycerides                   |       |
| Total Proteins                  |       |
| Albumin                         |       |
| IGF-1                           |       |
| Leukocytes                      |       |
| Platelets                       |       |
| Erythrocytes                    |       |
| Hemoglobin                      |       |
| Hematocrit                      |       |
| Creatinine Unit                 |       |
| Urea Unit                       |       |
| BUN Unit                        |       |
| Sodium Unit                     |       |
| Potassium Unit                  |       |
| Calcium Unit                    |       |
| Phosphorus Unit                 |       |
| GOT(AST) Unit                   |       |
| GPT(ALT) Unit                   |       |

| BLOOD LABORATORY EXAMINATIONS FORM DATA SUMMARY |            |       |                     |
|-------------------------------------------------|------------|-------|---------------------|
| PATIENT NUMBER: 666-01                          | VISIT: v04 | ROW:  | VISIT DATE: No date |
| FIELD                                           |            | VALUE |                     |
| Alkaline Phosphatase Unit                       |            |       |                     |
| Gamma GT Unit                                   |            |       |                     |
| Total Bilirubin Unit                            |            |       |                     |
| Direct Bilirubin Unit                           |            |       |                     |
| CPK Unit                                        |            |       |                     |
| Glucose Unit                                    |            |       |                     |
| HbA1c Unit                                      |            |       |                     |
| Uric Acid Unit                                  |            |       |                     |
| Total Cholesterol Unit                          |            |       |                     |
| HDL Cholesterol Unit                            |            |       |                     |
| LDL Cholesterol Unit                            |            |       |                     |
| Triglycerides Unit                              |            |       |                     |
| Total Proteins Unit                             |            |       |                     |
| Albumin Unit                                    |            |       |                     |
| IGF-1 Unit                                      |            |       |                     |
| Leukocytes Unit                                 |            |       |                     |
| Platelets Unit                                  |            |       |                     |
| Erythrocytes Unit                               |            |       |                     |
| Hemoglobin Unit                                 |            |       |                     |
| Hematocrit Unit                                 |            |       |                     |
| Creatinine Assessment                           |            |       |                     |
| Urea Assessment                                 |            |       |                     |
| BUN Assessment                                  |            |       |                     |
| Sodium Assessment                               |            |       |                     |
| Potassium Assessment                            |            |       |                     |
| Calcium Assessment                              |            |       |                     |
| Phosphorus Assessment                           |            |       |                     |
| GOT(AST) Assessment                             |            |       |                     |
| GPT(ALT) Assessment                             |            |       |                     |
| Alkaline Phosphatase Assessment                 |            |       |                     |
| Gamma GT Assessment                             |            |       |                     |
| Total Bilirubin Assessment                      |            |       |                     |
| Direct Bilirubin Assessment                     |            |       |                     |
| CPK Assessment                                  |            |       |                     |
| Glucose Assessment                              |            |       |                     |
| HbA1c Assessment                                |            |       |                     |
| Uric Acid Assessment                            |            |       |                     |
| Total Cholesterol Assessment                    |            |       |                     |
| HDL Cholesterol Assessment                      |            |       |                     |
| LDL Cholesterol Assessment                      |            |       |                     |

| BLOOD LABORATORY EXAMINATIONS FORM DATA SUMMARY |            |                 |                     |
|-------------------------------------------------|------------|-----------------|---------------------|
| PATIENT NUMBER: 666-01                          | VISIT: v04 | ROW:            | VISIT DATE: No date |
| FIELD                                           |            | VALUE           |                     |
| Triglycerides Assessment                        |            |                 |                     |
| Total Proteins Assessment                       |            |                 |                     |
| Albumin Assessment                              |            |                 |                     |
| IGF-1 Assessment                                |            |                 |                     |
| Leukocytes Assessment                           |            |                 |                     |
| Platelets Assessment                            |            |                 |                     |
| Erythrocytes Assessment                         |            |                 |                     |
| Hemoglobin Assessment                           |            |                 |                     |
| Hematocrit Assessment                           |            |                 |                     |
| INSERTED ON: 2011-10-10 14:47:43                |            | BY: Demo Demo   | LOCKED: NO          |
| PRINTED ON: 2011-10-10 15:36:42                 |            | BY: Nadia Rubis |                     |

|                        |            |      |                     |
|------------------------|------------|------|---------------------|
| PATIENT NUMBER: 666-01 | VISIT: v05 | ROW: | VISIT DATE: No date |
|------------------------|------------|------|---------------------|

| FIELD                           | VALUE |
|---------------------------------|-------|
| Date of Sample                  |       |
| Was the patient fasting or not? |       |
| Creatinine                      |       |
| Urea                            |       |
| BUN                             |       |
| Sodium                          |       |
| Potassium                       |       |
| Calcium                         |       |
| Phosphorus                      |       |
| GOT(AST)                        |       |
| GPT(ALT)                        |       |
| Alkaline Phosphatase            |       |
| Gamma GT                        |       |
| Total Bilirubin                 |       |
| Direct Bilirubin                |       |
| CPK                             |       |
| Glucose                         |       |
| HbA1c                           |       |
| Uric Acid                       |       |
| Total Cholesterol               |       |
| HDL Cholesterol                 |       |
| LDL Cholesterol                 |       |
| Triglycerides                   |       |
| Total Proteins                  |       |
| Albumin                         |       |
| IGF-1                           |       |
| Leukocytes                      |       |
| Platelets                       |       |
| Erythrocytes                    |       |
| Hemoglobin                      |       |
| Hematocrit                      |       |
| Creatinine Unit                 |       |
| Urea Unit                       |       |
| BUN Unit                        |       |
| Sodium Unit                     |       |
| Potassium Unit                  |       |
| Calcium Unit                    |       |
| Phosphorus Unit                 |       |
| GOT(AST) Unit                   |       |
| GPT(ALT) Unit                   |       |

| BLOOD LABORATORY EXAMINATIONS FORM DATA SUMMARY |            |       |                     |
|-------------------------------------------------|------------|-------|---------------------|
| PATIENT NUMBER: 666-01                          | VISIT: v05 | ROW:  | VISIT DATE: No date |
| FIELD                                           |            | VALUE |                     |
| Alkaline Phosphatase Unit                       |            |       |                     |
| Gamma GT Unit                                   |            |       |                     |
| Total Bilirubin Unit                            |            |       |                     |
| Direct Bilirubin Unit                           |            |       |                     |
| CPK Unit                                        |            |       |                     |
| Glucose Unit                                    |            |       |                     |
| HbA1c Unit                                      |            |       |                     |
| Uric Acid Unit                                  |            |       |                     |
| Total Cholesterol Unit                          |            |       |                     |
| HDL Cholesterol Unit                            |            |       |                     |
| LDL Cholesterol Unit                            |            |       |                     |
| Triglycerides Unit                              |            |       |                     |
| Total Proteins Unit                             |            |       |                     |
| Albumin Unit                                    |            |       |                     |
| IGF-1 Unit                                      |            |       |                     |
| Leukocytes Unit                                 |            |       |                     |
| Platelets Unit                                  |            |       |                     |
| Erythrocytes Unit                               |            |       |                     |
| Hemoglobin Unit                                 |            |       |                     |
| Hematocrit Unit                                 |            |       |                     |
| Creatinine Assessment                           |            |       |                     |
| Urea Assessment                                 |            |       |                     |
| BUN Assessment                                  |            |       |                     |
| Sodium Assessment                               |            |       |                     |
| Potassium Assessment                            |            |       |                     |
| Calcium Assessment                              |            |       |                     |
| Phosphorus Assessment                           |            |       |                     |
| GOT(AST) Assessment                             |            |       |                     |
| GPT(ALT) Assessment                             |            |       |                     |
| Alkaline Phosphatase Assessment                 |            |       |                     |
| Gamma GT Assessment                             |            |       |                     |
| Total Bilirubin Assessment                      |            |       |                     |
| Direct Bilirubin Assessment                     |            |       |                     |
| CPK Assessment                                  |            |       |                     |
| Glucose Assessment                              |            |       |                     |
| HbA1c Assessment                                |            |       |                     |
| Uric Acid Assessment                            |            |       |                     |
| Total Cholesterol Assessment                    |            |       |                     |
| HDL Cholesterol Assessment                      |            |       |                     |
| LDL Cholesterol Assessment                      |            |       |                     |

| BLOOD LABORATORY EXAMINATIONS FORM DATA SUMMARY |            |                 |                     |
|-------------------------------------------------|------------|-----------------|---------------------|
| PATIENT NUMBER: 666-01                          | VISIT: v05 | ROW:            | VISIT DATE: No date |
| FIELD                                           |            | VALUE           |                     |
| Triglycerides Assessment                        |            |                 |                     |
| Total Proteins Assessment                       |            |                 |                     |
| Albumin Assessment                              |            |                 |                     |
| IGF-1 Assessment                                |            |                 |                     |
| Leukocytes Assessment                           |            |                 |                     |
| Platelets Assessment                            |            |                 |                     |
| Erythrocytes Assessment                         |            |                 |                     |
| Hemoglobin Assessment                           |            |                 |                     |
| Hematocrit Assessment                           |            |                 |                     |
| INSERTED ON: 2011-10-10 14:47:50                |            | BY: Demo Demo   | LOCKED: NO          |
| PRINTED ON: 2011-10-10 15:36:43                 |            | BY: Nadia Rubis |                     |

|                        |            |      |                     |
|------------------------|------------|------|---------------------|
| PATIENT NUMBER: 666-01 | VISIT: v06 | ROW: | VISIT DATE: No date |
|------------------------|------------|------|---------------------|

| FIELD                           | VALUE |
|---------------------------------|-------|
| Date of Sample                  |       |
| Was the patient fasting or not? |       |
| Creatinine                      |       |
| Urea                            |       |
| BUN                             |       |
| Sodium                          |       |
| Potassium                       |       |
| Calcium                         |       |
| Phosphorus                      |       |
| GOT(AST)                        |       |
| GPT(ALT)                        |       |
| Alkaline Phosphatase            |       |
| Gamma GT                        |       |
| Total Bilirubin                 |       |
| Direct Bilirubin                |       |
| CPK                             |       |
| Glucose                         |       |
| HbA1c                           |       |
| Uric Acid                       |       |
| Total Cholesterol               |       |
| HDL Cholesterol                 |       |
| LDL Cholesterol                 |       |
| Triglycerides                   |       |
| Total Proteins                  |       |
| Albumin                         |       |
| IGF-1                           |       |
| Leukocytes                      |       |
| Platelets                       |       |
| Erythrocytes                    |       |
| Hemoglobin                      |       |
| Hematocrit                      |       |
| Creatinine Unit                 |       |
| Urea Unit                       |       |
| BUN Unit                        |       |
| Sodium Unit                     |       |
| Potassium Unit                  |       |
| Calcium Unit                    |       |
| Phosphorus Unit                 |       |
| GOT(AST) Unit                   |       |
| GPT(ALT) Unit                   |       |

| BLOOD LABORATORY EXAMINATIONS FORM DATA SUMMARY |            |       |                     |
|-------------------------------------------------|------------|-------|---------------------|
| PATIENT NUMBER: 666-01                          | VISIT: v06 | ROW:  | VISIT DATE: No date |
| FIELD                                           |            | VALUE |                     |
| Alkaline Phosphatase Unit                       |            |       |                     |
| Gamma GT Unit                                   |            |       |                     |
| Total Bilirubin Unit                            |            |       |                     |
| Direct Bilirubin Unit                           |            |       |                     |
| CPK Unit                                        |            |       |                     |
| Glucose Unit                                    |            |       |                     |
| HbA1c Unit                                      |            |       |                     |
| Uric Acid Unit                                  |            |       |                     |
| Total Cholesterol Unit                          |            |       |                     |
| HDL Cholesterol Unit                            |            |       |                     |
| LDL Cholesterol Unit                            |            |       |                     |
| Triglycerides Unit                              |            |       |                     |
| Total Proteins Unit                             |            |       |                     |
| Albumin Unit                                    |            |       |                     |
| IGF-1 Unit                                      |            |       |                     |
| Leukocytes Unit                                 |            |       |                     |
| Platelets Unit                                  |            |       |                     |
| Erythrocytes Unit                               |            |       |                     |
| Hemoglobin Unit                                 |            |       |                     |
| Hematocrit Unit                                 |            |       |                     |
| Creatinine Assessment                           |            |       |                     |
| Urea Assessment                                 |            |       |                     |
| BUN Assessment                                  |            |       |                     |
| Sodium Assessment                               |            |       |                     |
| Potassium Assessment                            |            |       |                     |
| Calcium Assessment                              |            |       |                     |
| Phosphorus Assessment                           |            |       |                     |
| GOT(AST) Assessment                             |            |       |                     |
| GPT(ALT) Assessment                             |            |       |                     |
| Alkaline Phosphatase Assessment                 |            |       |                     |
| Gamma GT Assessment                             |            |       |                     |
| Total Bilirubin Assessment                      |            |       |                     |
| Direct Bilirubin Assessment                     |            |       |                     |
| CPK Assessment                                  |            |       |                     |
| Glucose Assessment                              |            |       |                     |
| HbA1c Assessment                                |            |       |                     |
| Uric Acid Assessment                            |            |       |                     |
| Total Cholesterol Assessment                    |            |       |                     |
| HDL Cholesterol Assessment                      |            |       |                     |
| LDL Cholesterol Assessment                      |            |       |                     |

| BLOOD LABORATORY EXAMINATIONS FORM DATA SUMMARY |            |                 |                     |
|-------------------------------------------------|------------|-----------------|---------------------|
| PATIENT NUMBER: 666-01                          | VISIT: v06 | ROW:            | VISIT DATE: No date |
| FIELD                                           |            | VALUE           |                     |
| Triglycerides Assessment                        |            |                 |                     |
| Total Proteins Assessment                       |            |                 |                     |
| Albumin Assessment                              |            |                 |                     |
| IGF-1 Assessment                                |            |                 |                     |
| Leukocytes Assessment                           |            |                 |                     |
| Platelets Assessment                            |            |                 |                     |
| Erythrocytes Assessment                         |            |                 |                     |
| Hemoglobin Assessment                           |            |                 |                     |
| Hematocrit Assessment                           |            |                 |                     |
| INSERTED ON: 2011-10-10 14:47:56                |            | BY: Demo Demo   | LOCKED: NO          |
| PRINTED ON: 2011-10-10 15:36:43                 |            | BY: Nadia Rubis |                     |

|                        |            |      |                     |
|------------------------|------------|------|---------------------|
| PATIENT NUMBER: 666-01 | VISIT: v07 | ROW: | VISIT DATE: No date |
|------------------------|------------|------|---------------------|

| FIELD                           | VALUE |
|---------------------------------|-------|
| Date of Sample                  |       |
| Was the patient fasting or not? |       |
| Creatinine                      |       |
| Urea                            |       |
| BUN                             |       |
| Sodium                          |       |
| Potassium                       |       |
| Calcium                         |       |
| Phosphorus                      |       |
| GOT(AST)                        |       |
| GPT(ALT)                        |       |
| Alkaline Phosphatase            |       |
| Gamma GT                        |       |
| Total Bilirubin                 |       |
| Direct Bilirubin                |       |
| CPK                             |       |
| Glucose                         |       |
| HbA1c                           |       |
| Uric Acid                       |       |
| Total Cholesterol               |       |
| HDL Cholesterol                 |       |
| LDL Cholesterol                 |       |
| Triglycerides                   |       |
| Total Proteins                  |       |
| Albumin                         |       |
| IGF-1                           |       |
| Leukocytes                      |       |
| Platelets                       |       |
| Erythrocytes                    |       |
| Hemoglobin                      |       |
| Hematocrit                      |       |
| Creatinine Unit                 |       |
| Urea Unit                       |       |
| BUN Unit                        |       |
| Sodium Unit                     |       |
| Potassium Unit                  |       |
| Calcium Unit                    |       |
| Phosphorus Unit                 |       |
| GOT(AST) Unit                   |       |
| GPT(ALT) Unit                   |       |

| BLOOD LABORATORY EXAMINATIONS FORM DATA SUMMARY |            |       |                     |
|-------------------------------------------------|------------|-------|---------------------|
| PATIENT NUMBER: 666-01                          | VISIT: v07 | ROW:  | VISIT DATE: No date |
| FIELD                                           |            | VALUE |                     |
| Alkaline Phosphatase Unit                       |            |       |                     |
| Gamma GT Unit                                   |            |       |                     |
| Total Bilirubin Unit                            |            |       |                     |
| Direct Bilirubin Unit                           |            |       |                     |
| CPK Unit                                        |            |       |                     |
| Glucose Unit                                    |            |       |                     |
| HbA1c Unit                                      |            |       |                     |
| Uric Acid Unit                                  |            |       |                     |
| Total Cholesterol Unit                          |            |       |                     |
| HDL Cholesterol Unit                            |            |       |                     |
| LDL Cholesterol Unit                            |            |       |                     |
| Triglycerides Unit                              |            |       |                     |
| Total Proteins Unit                             |            |       |                     |
| Albumin Unit                                    |            |       |                     |
| IGF-1 Unit                                      |            |       |                     |
| Leukocytes Unit                                 |            |       |                     |
| Platelets Unit                                  |            |       |                     |
| Erythrocytes Unit                               |            |       |                     |
| Hemoglobin Unit                                 |            |       |                     |
| Hematocrit Unit                                 |            |       |                     |
| Creatinine Assessment                           |            |       |                     |
| Urea Assessment                                 |            |       |                     |
| BUN Assessment                                  |            |       |                     |
| Sodium Assessment                               |            |       |                     |
| Potassium Assessment                            |            |       |                     |
| Calcium Assessment                              |            |       |                     |
| Phosphorus Assessment                           |            |       |                     |
| GOT(AST) Assessment                             |            |       |                     |
| GPT(ALT) Assessment                             |            |       |                     |
| Alkaline Phosphatase Assessment                 |            |       |                     |
| Gamma GT Assessment                             |            |       |                     |
| Total Bilirubin Assessment                      |            |       |                     |
| Direct Bilirubin Assessment                     |            |       |                     |
| CPK Assessment                                  |            |       |                     |
| Glucose Assessment                              |            |       |                     |
| HbA1c Assessment                                |            |       |                     |
| Uric Acid Assessment                            |            |       |                     |
| Total Cholesterol Assessment                    |            |       |                     |
| HDL Cholesterol Assessment                      |            |       |                     |
| LDL Cholesterol Assessment                      |            |       |                     |

| BLOOD LABORATORY EXAMINATIONS FORM DATA SUMMARY |            |      |                     |
|-------------------------------------------------|------------|------|---------------------|
| PATIENT NUMBER: 666-01                          | VISIT: v07 | ROW: | VISIT DATE: No date |

  

| FIELD                     | VALUE |
|---------------------------|-------|
| Triglycerides Assessment  |       |
| Total Proteins Assessment |       |
| Albumin Assessment        |       |
| IGF-1 Assessment          |       |
| Leukocytes Assessment     |       |
| Platelets Assessment      |       |
| Erythrocytes Assessment   |       |
| Hemoglobin Assessment     |       |
| Hematocrit Assessment     |       |

  

|                                  |                 |            |
|----------------------------------|-----------------|------------|
| INSERTED ON: 2011-10-10 14:48:19 | BY: Demo Demo   | LOCKED: NO |
| PRINTED ON: 2011-10-10 15:36:43  | BY: Nadia Rubis |            |

|                        |            |      |                     |
|------------------------|------------|------|---------------------|
| PATIENT NUMBER: 666-01 | VISIT: v08 | ROW: | VISIT DATE: No date |
|------------------------|------------|------|---------------------|

| FIELD                           | VALUE |
|---------------------------------|-------|
| Date of Sample                  |       |
| Was the patient fasting or not? |       |
| Creatinine                      |       |
| Urea                            |       |
| BUN                             |       |
| Sodium                          |       |
| Potassium                       |       |
| Calcium                         |       |
| Phosphorus                      |       |
| GOT(AST)                        |       |
| GPT(ALT)                        |       |
| Alkaline Phosphatase            |       |
| Gamma GT                        |       |
| Total Bilirubin                 |       |
| Direct Bilirubin                |       |
| CPK                             |       |
| Glucose                         |       |
| HbA1c                           |       |
| Uric Acid                       |       |
| Total Cholesterol               |       |
| HDL Cholesterol                 |       |
| LDL Cholesterol                 |       |
| Triglycerides                   |       |
| Total Proteins                  |       |
| Albumin                         |       |
| IGF-1                           |       |
| Leukocytes                      |       |
| Platelets                       |       |
| Erythrocytes                    |       |
| Hemoglobin                      |       |
| Hematocrit                      |       |
| Creatinine Unit                 |       |
| Urea Unit                       |       |
| BUN Unit                        |       |
| Sodium Unit                     |       |
| Potassium Unit                  |       |
| Calcium Unit                    |       |
| Phosphorus Unit                 |       |
| GOT(AST) Unit                   |       |
| GPT(ALT) Unit                   |       |

| BLOOD LABORATORY EXAMINATIONS FORM DATA SUMMARY |            |       |                     |
|-------------------------------------------------|------------|-------|---------------------|
| PATIENT NUMBER: 666-01                          | VISIT: v08 | ROW:  | VISIT DATE: No date |
| FIELD                                           |            | VALUE |                     |
| Alkaline Phosphatase Unit                       |            |       |                     |
| Gamma GT Unit                                   |            |       |                     |
| Total Bilirubin Unit                            |            |       |                     |
| Direct Bilirubin Unit                           |            |       |                     |
| CPK Unit                                        |            |       |                     |
| Glucose Unit                                    |            |       |                     |
| HbA1c Unit                                      |            |       |                     |
| Uric Acid Unit                                  |            |       |                     |
| Total Cholesterol Unit                          |            |       |                     |
| HDL Cholesterol Unit                            |            |       |                     |
| LDL Cholesterol Unit                            |            |       |                     |
| Triglycerides Unit                              |            |       |                     |
| Total Proteins Unit                             |            |       |                     |
| Albumin Unit                                    |            |       |                     |
| IGF-1 Unit                                      |            |       |                     |
| Leukocytes Unit                                 |            |       |                     |
| Platelets Unit                                  |            |       |                     |
| Erythrocytes Unit                               |            |       |                     |
| Hemoglobin Unit                                 |            |       |                     |
| Hematocrit Unit                                 |            |       |                     |
| Creatinine Assessment                           |            |       |                     |
| Urea Assessment                                 |            |       |                     |
| BUN Assessment                                  |            |       |                     |
| Sodium Assessment                               |            |       |                     |
| Potassium Assessment                            |            |       |                     |
| Calcium Assessment                              |            |       |                     |
| Phosphorus Assessment                           |            |       |                     |
| GOT(AST) Assessment                             |            |       |                     |
| GPT(ALT) Assessment                             |            |       |                     |
| Alkaline Phosphatase Assessment                 |            |       |                     |
| Gamma GT Assessment                             |            |       |                     |
| Total Bilirubin Assessment                      |            |       |                     |
| Direct Bilirubin Assessment                     |            |       |                     |
| CPK Assessment                                  |            |       |                     |
| Glucose Assessment                              |            |       |                     |
| HbA1c Assessment                                |            |       |                     |
| Uric Acid Assessment                            |            |       |                     |
| Total Cholesterol Assessment                    |            |       |                     |
| HDL Cholesterol Assessment                      |            |       |                     |
| LDL Cholesterol Assessment                      |            |       |                     |

| BLOOD LABORATORY EXAMINATIONS FORM DATA SUMMARY |            |                 |                     |
|-------------------------------------------------|------------|-----------------|---------------------|
| PATIENT NUMBER: 666-01                          | VISIT: v08 | ROW:            | VISIT DATE: No date |
| FIELD                                           |            | VALUE           |                     |
| Triglycerides Assessment                        |            |                 |                     |
| Total Proteins Assessment                       |            |                 |                     |
| Albumin Assessment                              |            |                 |                     |
| IGF-1 Assessment                                |            |                 |                     |
| Leukocytes Assessment                           |            |                 |                     |
| Platelets Assessment                            |            |                 |                     |
| Erythrocytes Assessment                         |            |                 |                     |
| Hemoglobin Assessment                           |            |                 |                     |
| Hematocrit Assessment                           |            |                 |                     |
| INSERTED ON: 2011-10-10 14:48:26                |            | BY: Demo Demo   | LOCKED: NO          |
| PRINTED ON: 2011-10-10 15:36:43                 |            | BY: Nadia Rubis |                     |

|                        |            |      |                     |
|------------------------|------------|------|---------------------|
| PATIENT NUMBER: 666-01 | VISIT: v09 | ROW: | VISIT DATE: No date |
|------------------------|------------|------|---------------------|

| FIELD                           | VALUE |
|---------------------------------|-------|
| Date of Sample                  |       |
| Was the patient fasting or not? |       |
| Creatinine                      |       |
| Urea                            |       |
| BUN                             |       |
| Sodium                          |       |
| Potassium                       |       |
| Calcium                         |       |
| Phosphorus                      |       |
| GOT(AST)                        |       |
| GPT(ALT)                        |       |
| Alkaline Phosphatase            |       |
| Gamma GT                        |       |
| Total Bilirubin                 |       |
| Direct Bilirubin                |       |
| CPK                             |       |
| Glucose                         |       |
| HbA1c                           |       |
| Uric Acid                       |       |
| Total Cholesterol               |       |
| HDL Cholesterol                 |       |
| LDL Cholesterol                 |       |
| Triglycerides                   |       |
| Total Proteins                  |       |
| Albumin                         |       |
| IGF-1                           |       |
| Leukocytes                      |       |
| Platelets                       |       |
| Erythrocytes                    |       |
| Hemoglobin                      |       |
| Hematocrit                      |       |
| Creatinine Unit                 |       |
| Urea Unit                       |       |
| BUN Unit                        |       |
| Sodium Unit                     |       |
| Potassium Unit                  |       |
| Calcium Unit                    |       |
| Phosphorus Unit                 |       |
| GOT(AST) Unit                   |       |
| GPT(ALT) Unit                   |       |

| BLOOD LABORATORY EXAMINATIONS FORM DATA SUMMARY |            |       |                     |
|-------------------------------------------------|------------|-------|---------------------|
| PATIENT NUMBER: 666-01                          | VISIT: v09 | ROW:  | VISIT DATE: No date |
| FIELD                                           |            | VALUE |                     |
| Alkaline Phosphatase Unit                       |            |       |                     |
| Gamma GT Unit                                   |            |       |                     |
| Total Bilirubin Unit                            |            |       |                     |
| Direct Bilirubin Unit                           |            |       |                     |
| CPK Unit                                        |            |       |                     |
| Glucose Unit                                    |            |       |                     |
| HbA1c Unit                                      |            |       |                     |
| Uric Acid Unit                                  |            |       |                     |
| Total Cholesterol Unit                          |            |       |                     |
| HDL Cholesterol Unit                            |            |       |                     |
| LDL Cholesterol Unit                            |            |       |                     |
| Triglycerides Unit                              |            |       |                     |
| Total Proteins Unit                             |            |       |                     |
| Albumin Unit                                    |            |       |                     |
| IGF-1 Unit                                      |            |       |                     |
| Leukocytes Unit                                 |            |       |                     |
| Platelets Unit                                  |            |       |                     |
| Erythrocytes Unit                               |            |       |                     |
| Hemoglobin Unit                                 |            |       |                     |
| Hematocrit Unit                                 |            |       |                     |
| Creatinine Assessment                           |            |       |                     |
| Urea Assessment                                 |            |       |                     |
| BUN Assessment                                  |            |       |                     |
| Sodium Assessment                               |            |       |                     |
| Potassium Assessment                            |            |       |                     |
| Calcium Assessment                              |            |       |                     |
| Phosphorus Assessment                           |            |       |                     |
| GOT(AST) Assessment                             |            |       |                     |
| GPT(ALT) Assessment                             |            |       |                     |
| Alkaline Phosphatase Assessment                 |            |       |                     |
| Gamma GT Assessment                             |            |       |                     |
| Total Bilirubin Assessment                      |            |       |                     |
| Direct Bilirubin Assessment                     |            |       |                     |
| CPK Assessment                                  |            |       |                     |
| Glucose Assessment                              |            |       |                     |
| HbA1c Assessment                                |            |       |                     |
| Uric Acid Assessment                            |            |       |                     |
| Total Cholesterol Assessment                    |            |       |                     |
| HDL Cholesterol Assessment                      |            |       |                     |
| LDL Cholesterol Assessment                      |            |       |                     |

| BLOOD LABORATORY EXAMINATIONS FORM DATA SUMMARY |            |                 |                     |
|-------------------------------------------------|------------|-----------------|---------------------|
| PATIENT NUMBER: 666-01                          | VISIT: v09 | ROW:            | VISIT DATE: No date |
| FIELD                                           |            | VALUE           |                     |
| Triglycerides Assessment                        |            |                 |                     |
| Total Proteins Assessment                       |            |                 |                     |
| Albumin Assessment                              |            |                 |                     |
| IGF-1 Assessment                                |            |                 |                     |
| Leukocytes Assessment                           |            |                 |                     |
| Platelets Assessment                            |            |                 |                     |
| Erythrocytes Assessment                         |            |                 |                     |
| Hemoglobin Assessment                           |            |                 |                     |
| Hematocrit Assessment                           |            |                 |                     |
| INSERTED ON: 2011-10-10 14:48:32                |            | BY: Demo Demo   | LOCKED: NO          |
| PRINTED ON: 2011-10-10 15:36:43                 |            | BY: Nadia Rubis |                     |

|                        |            |      |                     |
|------------------------|------------|------|---------------------|
| PATIENT NUMBER: 666-01 | VISIT: v10 | ROW: | VISIT DATE: No date |
|------------------------|------------|------|---------------------|

| FIELD                           | VALUE |
|---------------------------------|-------|
| Date of Sample                  |       |
| Was the patient fasting or not? |       |
| Creatinine                      |       |
| Urea                            |       |
| BUN                             |       |
| Sodium                          |       |
| Potassium                       |       |
| Calcium                         |       |
| Phosphorus                      |       |
| GOT(AST)                        |       |
| GPT(ALT)                        |       |
| Alkaline Phosphatase            |       |
| Gamma GT                        |       |
| Total Bilirubin                 |       |
| Direct Bilirubin                |       |
| CPK                             |       |
| Glucose                         |       |
| HbA1c                           |       |
| Uric Acid                       |       |
| Total Cholesterol               |       |
| HDL Cholesterol                 |       |
| LDL Cholesterol                 |       |
| Triglycerides                   |       |
| Total Proteins                  |       |
| Albumin                         |       |
| IGF-1                           |       |
| Leukocytes                      |       |
| Platelets                       |       |
| Erythrocytes                    |       |
| Hemoglobin                      |       |
| Hematocrit                      |       |
| Creatinine Unit                 |       |
| Urea Unit                       |       |
| BUN Unit                        |       |
| Sodium Unit                     |       |
| Potassium Unit                  |       |
| Calcium Unit                    |       |
| Phosphorus Unit                 |       |
| GOT(AST) Unit                   |       |
| GPT(ALT) Unit                   |       |

| BLOOD LABORATORY EXAMINATIONS FORM DATA SUMMARY |            |       |                     |
|-------------------------------------------------|------------|-------|---------------------|
| PATIENT NUMBER: 666-01                          | VISIT: v10 | ROW:  | VISIT DATE: No date |
| FIELD                                           |            | VALUE |                     |
| Alkaline Phosphatase Unit                       |            |       |                     |
| Gamma GT Unit                                   |            |       |                     |
| Total Bilirubin Unit                            |            |       |                     |
| Direct Bilirubin Unit                           |            |       |                     |
| CPK Unit                                        |            |       |                     |
| Glucose Unit                                    |            |       |                     |
| HbA1c Unit                                      |            |       |                     |
| Uric Acid Unit                                  |            |       |                     |
| Total Cholesterol Unit                          |            |       |                     |
| HDL Cholesterol Unit                            |            |       |                     |
| LDL Cholesterol Unit                            |            |       |                     |
| Triglycerides Unit                              |            |       |                     |
| Total Proteins Unit                             |            |       |                     |
| Albumin Unit                                    |            |       |                     |
| IGF-1 Unit                                      |            |       |                     |
| Leukocytes Unit                                 |            |       |                     |
| Platelets Unit                                  |            |       |                     |
| Erythrocytes Unit                               |            |       |                     |
| Hemoglobin Unit                                 |            |       |                     |
| Hematocrit Unit                                 |            |       |                     |
| Creatinine Assessment                           |            |       |                     |
| Urea Assessment                                 |            |       |                     |
| BUN Assessment                                  |            |       |                     |
| Sodium Assessment                               |            |       |                     |
| Potassium Assessment                            |            |       |                     |
| Calcium Assessment                              |            |       |                     |
| Phosphorus Assessment                           |            |       |                     |
| GOT(AST) Assessment                             |            |       |                     |
| GPT(ALT) Assessment                             |            |       |                     |
| Alkaline Phosphatase Assessment                 |            |       |                     |
| Gamma GT Assessment                             |            |       |                     |
| Total Bilirubin Assessment                      |            |       |                     |
| Direct Bilirubin Assessment                     |            |       |                     |
| CPK Assessment                                  |            |       |                     |
| Glucose Assessment                              |            |       |                     |
| HbA1c Assessment                                |            |       |                     |
| Uric Acid Assessment                            |            |       |                     |
| Total Cholesterol Assessment                    |            |       |                     |
| HDL Cholesterol Assessment                      |            |       |                     |
| LDL Cholesterol Assessment                      |            |       |                     |

| BLOOD LABORATORY EXAMINATIONS FORM DATA SUMMARY |  |                     |            |
|-------------------------------------------------|--|---------------------|------------|
| PATIENT NUMBER: 666-01                          |  | VISIT: v10          | ROW:       |
|                                                 |  | VISIT DATE: No date |            |
| FIELD                                           |  | VALUE               |            |
| Triglycerides Assessment                        |  |                     |            |
| Total Proteins Assessment                       |  |                     |            |
| Albumin Assessment                              |  |                     |            |
| IGF-1 Assessment                                |  |                     |            |
| Leukocytes Assessment                           |  |                     |            |
| Platelets Assessment                            |  |                     |            |
| Erythrocytes Assessment                         |  |                     |            |
| Hemoglobin Assessment                           |  |                     |            |
| Hematocrit Assessment                           |  |                     |            |
| INSERTED ON: 2011-10-10 14:48:37                |  | BY: Demo Demo       | LOCKED: NO |
| PRINTED ON: 2011-10-10 15:36:43                 |  | BY: Nadia Rubis     |            |

|                        |            |      |                     |
|------------------------|------------|------|---------------------|
| PATIENT NUMBER: 666-01 | VISIT: v11 | ROW: | VISIT DATE: No date |
|------------------------|------------|------|---------------------|

| FIELD                           | VALUE |
|---------------------------------|-------|
| Date of Sample                  |       |
| Was the patient fasting or not? |       |
| Creatinine                      |       |
| Urea                            |       |
| BUN                             |       |
| Sodium                          |       |
| Potassium                       |       |
| Calcium                         |       |
| Phosphorus                      |       |
| GOT(AST)                        |       |
| GPT(ALT)                        |       |
| Alkaline Phosphatase            |       |
| Gamma GT                        |       |
| Total Bilirubin                 |       |
| Direct Bilirubin                |       |
| CPK                             |       |
| Glucose                         |       |
| HbA1c                           |       |
| Uric Acid                       |       |
| Total Cholesterol               |       |
| HDL Cholesterol                 |       |
| LDL Cholesterol                 |       |
| Triglycerides                   |       |
| Total Proteins                  |       |
| Albumin                         |       |
| IGF-1                           |       |
| Leukocytes                      |       |
| Platelets                       |       |
| Erythrocytes                    |       |
| Hemoglobin                      |       |
| Hematocrit                      |       |
| Creatinine Unit                 |       |
| Urea Unit                       |       |
| BUN Unit                        |       |
| Sodium Unit                     |       |
| Potassium Unit                  |       |
| Calcium Unit                    |       |
| Phosphorus Unit                 |       |
| GOT(AST) Unit                   |       |
| GPT(ALT) Unit                   |       |

| BLOOD LABORATORY EXAMINATIONS FORM DATA SUMMARY |            |       |                     |
|-------------------------------------------------|------------|-------|---------------------|
| PATIENT NUMBER: 666-01                          | VISIT: v11 | ROW:  | VISIT DATE: No date |
| FIELD                                           |            | VALUE |                     |
| Alkaline Phosphatase Unit                       |            |       |                     |
| Gamma GT Unit                                   |            |       |                     |
| Total Bilirubin Unit                            |            |       |                     |
| Direct Bilirubin Unit                           |            |       |                     |
| CPK Unit                                        |            |       |                     |
| Glucose Unit                                    |            |       |                     |
| HbA1c Unit                                      |            |       |                     |
| Uric Acid Unit                                  |            |       |                     |
| Total Cholesterol Unit                          |            |       |                     |
| HDL Cholesterol Unit                            |            |       |                     |
| LDL Cholesterol Unit                            |            |       |                     |
| Triglycerides Unit                              |            |       |                     |
| Total Proteins Unit                             |            |       |                     |
| Albumin Unit                                    |            |       |                     |
| IGF-1 Unit                                      |            |       |                     |
| Leukocytes Unit                                 |            |       |                     |
| Platelets Unit                                  |            |       |                     |
| Erythrocytes Unit                               |            |       |                     |
| Hemoglobin Unit                                 |            |       |                     |
| Hematocrit Unit                                 |            |       |                     |
| Creatinine Assessment                           |            |       |                     |
| Urea Assessment                                 |            |       |                     |
| BUN Assessment                                  |            |       |                     |
| Sodium Assessment                               |            |       |                     |
| Potassium Assessment                            |            |       |                     |
| Calcium Assessment                              |            |       |                     |
| Phosphorus Assessment                           |            |       |                     |
| GOT(AST) Assessment                             |            |       |                     |
| GPT(ALT) Assessment                             |            |       |                     |
| Alkaline Phosphatase Assessment                 |            |       |                     |
| Gamma GT Assessment                             |            |       |                     |
| Total Bilirubin Assessment                      |            |       |                     |
| Direct Bilirubin Assessment                     |            |       |                     |
| CPK Assessment                                  |            |       |                     |
| Glucose Assessment                              |            |       |                     |
| HbA1c Assessment                                |            |       |                     |
| Uric Acid Assessment                            |            |       |                     |
| Total Cholesterol Assessment                    |            |       |                     |
| HDL Cholesterol Assessment                      |            |       |                     |
| LDL Cholesterol Assessment                      |            |       |                     |

| BLOOD LABORATORY EXAMINATIONS FORM DATA SUMMARY |            |                 |                     |
|-------------------------------------------------|------------|-----------------|---------------------|
| PATIENT NUMBER: 666-01                          | VISIT: v11 | ROW:            | VISIT DATE: No date |
| FIELD                                           |            | VALUE           |                     |
| Triglycerides Assessment                        |            |                 |                     |
| Total Proteins Assessment                       |            |                 |                     |
| Albumin Assessment                              |            |                 |                     |
| IGF-1 Assessment                                |            |                 |                     |
| Leukocytes Assessment                           |            |                 |                     |
| Platelets Assessment                            |            |                 |                     |
| Erythrocytes Assessment                         |            |                 |                     |
| Hemoglobin Assessment                           |            |                 |                     |
| Hematocrit Assessment                           |            |                 |                     |
| INSERTED ON: 2011-10-10 14:48:46                |            | BY: Demo Demo   | LOCKED: NO          |
| PRINTED ON: 2011-10-10 15:36:43                 |            | BY: Nadia Rubis |                     |

|                        |            |      |                     |
|------------------------|------------|------|---------------------|
| PATIENT NUMBER: 666-01 | VISIT: v12 | ROW: | VISIT DATE: No date |
|------------------------|------------|------|---------------------|

| FIELD                           | VALUE |
|---------------------------------|-------|
| Date of Sample                  |       |
| Was the patient fasting or not? |       |
| Creatinine                      |       |
| Urea                            |       |
| BUN                             |       |
| Sodium                          |       |
| Potassium                       |       |
| Calcium                         |       |
| Phosphorus                      |       |
| GOT(AST)                        |       |
| GPT(ALT)                        |       |
| Alkaline Phosphatase            |       |
| Gamma GT                        |       |
| Total Bilirubin                 |       |
| Direct Bilirubin                |       |
| CPK                             |       |
| Glucose                         |       |
| HbA1c                           |       |
| Uric Acid                       |       |
| Total Cholesterol               |       |
| HDL Cholesterol                 |       |
| LDL Cholesterol                 |       |
| Triglycerides                   |       |
| Total Proteins                  |       |
| Albumin                         |       |
| IGF-1                           |       |
| Leukocytes                      |       |
| Platelets                       |       |
| Erythrocytes                    |       |
| Hemoglobin                      |       |
| Hematocrit                      |       |
| Creatinine Unit                 |       |
| Urea Unit                       |       |
| BUN Unit                        |       |
| Sodium Unit                     |       |
| Potassium Unit                  |       |
| Calcium Unit                    |       |
| Phosphorus Unit                 |       |
| GOT(AST) Unit                   |       |
| GPT(ALT) Unit                   |       |

| BLOOD LABORATORY EXAMINATIONS FORM DATA SUMMARY |            |       |                     |
|-------------------------------------------------|------------|-------|---------------------|
| PATIENT NUMBER: 666-01                          | VISIT: v12 | ROW:  | VISIT DATE: No date |
| FIELD                                           |            | VALUE |                     |
| Alkaline Phosphatase Unit                       |            |       |                     |
| Gamma GT Unit                                   |            |       |                     |
| Total Bilirubin Unit                            |            |       |                     |
| Direct Bilirubin Unit                           |            |       |                     |
| CPK Unit                                        |            |       |                     |
| Glucose Unit                                    |            |       |                     |
| HbA1c Unit                                      |            |       |                     |
| Uric Acid Unit                                  |            |       |                     |
| Total Cholesterol Unit                          |            |       |                     |
| HDL Cholesterol Unit                            |            |       |                     |
| LDL Cholesterol Unit                            |            |       |                     |
| Triglycerides Unit                              |            |       |                     |
| Total Proteins Unit                             |            |       |                     |
| Albumin Unit                                    |            |       |                     |
| IGF-1 Unit                                      |            |       |                     |
| Leukocytes Unit                                 |            |       |                     |
| Platelets Unit                                  |            |       |                     |
| Erythrocytes Unit                               |            |       |                     |
| Hemoglobin Unit                                 |            |       |                     |
| Hematocrit Unit                                 |            |       |                     |
| Creatinine Assessment                           |            |       |                     |
| Urea Assessment                                 |            |       |                     |
| BUN Assessment                                  |            |       |                     |
| Sodium Assessment                               |            |       |                     |
| Potassium Assessment                            |            |       |                     |
| Calcium Assessment                              |            |       |                     |
| Phosphorus Assessment                           |            |       |                     |
| GOT(AST) Assessment                             |            |       |                     |
| GPT(ALT) Assessment                             |            |       |                     |
| Alkaline Phosphatase Assessment                 |            |       |                     |
| Gamma GT Assessment                             |            |       |                     |
| Total Bilirubin Assessment                      |            |       |                     |
| Direct Bilirubin Assessment                     |            |       |                     |
| CPK Assessment                                  |            |       |                     |
| Glucose Assessment                              |            |       |                     |
| HbA1c Assessment                                |            |       |                     |
| Uric Acid Assessment                            |            |       |                     |
| Total Cholesterol Assessment                    |            |       |                     |
| HDL Cholesterol Assessment                      |            |       |                     |
| LDL Cholesterol Assessment                      |            |       |                     |

| BLOOD LABORATORY EXAMINATIONS FORM DATA SUMMARY |  |                     |      |
|-------------------------------------------------|--|---------------------|------|
| PATIENT NUMBER: 666-01                          |  | VISIT: v12          | ROW: |
|                                                 |  | VISIT DATE: No date |      |

  

| FIELD                     | VALUE |
|---------------------------|-------|
| Triglycerides Assessment  |       |
| Total Proteins Assessment |       |
| Albumin Assessment        |       |
| IGF-1 Assessment          |       |
| Leukocytes Assessment     |       |
| Platelets Assessment      |       |
| Erythrocytes Assessment   |       |
| Hemoglobin Assessment     |       |
| Hematocrit Assessment     |       |

  

|                                  |                 |            |
|----------------------------------|-----------------|------------|
| INSERTED ON: 2011-10-10 14:48:53 | BY: Demo Demo   | LOCKED: NO |
| PRINTED ON: 2011-10-10 15:36:43  | BY: Nadia Rubis |            |

|                        |            |      |                     |
|------------------------|------------|------|---------------------|
| PATIENT NUMBER: 666-01 | VISIT: v13 | ROW: | VISIT DATE: No date |
|------------------------|------------|------|---------------------|

| FIELD                           | VALUE |
|---------------------------------|-------|
| Date of Sample                  |       |
| Was the patient fasting or not? |       |
| Creatinine                      |       |
| Urea                            |       |
| BUN                             |       |
| Sodium                          |       |
| Potassium                       |       |
| Calcium                         |       |
| Phosphorus                      |       |
| GOT(AST)                        |       |
| GPT(ALT)                        |       |
| Alkaline Phosphatase            |       |
| Gamma GT                        |       |
| Total Bilirubin                 |       |
| Direct Bilirubin                |       |
| CPK                             |       |
| Glucose                         |       |
| HbA1c                           |       |
| Uric Acid                       |       |
| Total Cholesterol               |       |
| HDL Cholesterol                 |       |
| LDL Cholesterol                 |       |
| Triglycerides                   |       |
| Total Proteins                  |       |
| Albumin                         |       |
| IGF-1                           |       |
| Leukocytes                      |       |
| Platelets                       |       |
| Erythrocytes                    |       |
| Hemoglobin                      |       |
| Hematocrit                      |       |
| Creatinine Unit                 |       |
| Urea Unit                       |       |
| BUN Unit                        |       |
| Sodium Unit                     |       |
| Potassium Unit                  |       |
| Calcium Unit                    |       |
| Phosphorus Unit                 |       |
| GOT(AST) Unit                   |       |
| GPT(ALT) Unit                   |       |

| BLOOD LABORATORY EXAMINATIONS FORM DATA SUMMARY |            |       |                     |
|-------------------------------------------------|------------|-------|---------------------|
| PATIENT NUMBER: 666-01                          | VISIT: v13 | ROW:  | VISIT DATE: No date |
| FIELD                                           |            | VALUE |                     |
| Alkaline Phosphatase Unit                       |            |       |                     |
| Gamma GT Unit                                   |            |       |                     |
| Total Bilirubin Unit                            |            |       |                     |
| Direct Bilirubin Unit                           |            |       |                     |
| CPK Unit                                        |            |       |                     |
| Glucose Unit                                    |            |       |                     |
| HbA1c Unit                                      |            |       |                     |
| Uric Acid Unit                                  |            |       |                     |
| Total Cholesterol Unit                          |            |       |                     |
| HDL Cholesterol Unit                            |            |       |                     |
| LDL Cholesterol Unit                            |            |       |                     |
| Triglycerides Unit                              |            |       |                     |
| Total Proteins Unit                             |            |       |                     |
| Albumin Unit                                    |            |       |                     |
| IGF-1 Unit                                      |            |       |                     |
| Leukocytes Unit                                 |            |       |                     |
| Platelets Unit                                  |            |       |                     |
| Erythrocytes Unit                               |            |       |                     |
| Hemoglobin Unit                                 |            |       |                     |
| Hematocrit Unit                                 |            |       |                     |
| Creatinine Assessment                           |            |       |                     |
| Urea Assessment                                 |            |       |                     |
| BUN Assessment                                  |            |       |                     |
| Sodium Assessment                               |            |       |                     |
| Potassium Assessment                            |            |       |                     |
| Calcium Assessment                              |            |       |                     |
| Phosphorus Assessment                           |            |       |                     |
| GOT(AST) Assessment                             |            |       |                     |
| GPT(ALT) Assessment                             |            |       |                     |
| Alkaline Phosphatase Assessment                 |            |       |                     |
| Gamma GT Assessment                             |            |       |                     |
| Total Bilirubin Assessment                      |            |       |                     |
| Direct Bilirubin Assessment                     |            |       |                     |
| CPK Assessment                                  |            |       |                     |
| Glucose Assessment                              |            |       |                     |
| HbA1c Assessment                                |            |       |                     |
| Uric Acid Assessment                            |            |       |                     |
| Total Cholesterol Assessment                    |            |       |                     |
| HDL Cholesterol Assessment                      |            |       |                     |
| LDL Cholesterol Assessment                      |            |       |                     |

| BLOOD LABORATORY EXAMINATIONS FORM DATA SUMMARY |            |                 |                     |
|-------------------------------------------------|------------|-----------------|---------------------|
| PATIENT NUMBER: 666-01                          | VISIT: v13 | ROW:            | VISIT DATE: No date |
| FIELD                                           |            | VALUE           |                     |
| Triglycerides Assessment                        |            |                 |                     |
| Total Proteins Assessment                       |            |                 |                     |
| Albumin Assessment                              |            |                 |                     |
| IGF-1 Assessment                                |            |                 |                     |
| Leukocytes Assessment                           |            |                 |                     |
| Platelets Assessment                            |            |                 |                     |
| Erythrocytes Assessment                         |            |                 |                     |
| Hemoglobin Assessment                           |            |                 |                     |
| Hematocrit Assessment                           |            |                 |                     |
| INSERTED ON: 2011-10-10 14:49:25                |            | BY: Demo Demo   | LOCKED: NO          |
| PRINTED ON: 2011-10-10 15:36:43                 |            | BY: Nadia Rubis |                     |

|                        |            |      |                     |
|------------------------|------------|------|---------------------|
| PATIENT NUMBER: 666-01 | VISIT: v14 | ROW: | VISIT DATE: No date |
|------------------------|------------|------|---------------------|

| FIELD                           | VALUE |
|---------------------------------|-------|
| Date of Sample                  |       |
| Was the patient fasting or not? |       |
| Creatinine                      |       |
| Urea                            |       |
| BUN                             |       |
| Sodium                          |       |
| Potassium                       |       |
| Calcium                         |       |
| Phosphorus                      |       |
| GOT(AST)                        |       |
| GPT(ALT)                        |       |
| Alkaline Phosphatase            |       |
| Gamma GT                        |       |
| Total Bilirubin                 |       |
| Direct Bilirubin                |       |
| CPK                             |       |
| Glucose                         |       |
| HbA1c                           |       |
| Uric Acid                       |       |
| Total Cholesterol               |       |
| HDL Cholesterol                 |       |
| LDL Cholesterol                 |       |
| Triglycerides                   |       |
| Total Proteins                  |       |
| Albumin                         |       |
| IGF-1                           |       |
| Leukocytes                      |       |
| Platelets                       |       |
| Erythrocytes                    |       |
| Hemoglobin                      |       |
| Hematocrit                      |       |
| Creatinine Unit                 |       |
| Urea Unit                       |       |
| BUN Unit                        |       |
| Sodium Unit                     |       |
| Potassium Unit                  |       |
| Calcium Unit                    |       |
| Phosphorus Unit                 |       |
| GOT(AST) Unit                   |       |
| GPT(ALT) Unit                   |       |

| BLOOD LABORATORY EXAMINATIONS FORM DATA SUMMARY |            |       |                     |
|-------------------------------------------------|------------|-------|---------------------|
| PATIENT NUMBER: 666-01                          | VISIT: v14 | ROW:  | VISIT DATE: No date |
| FIELD                                           |            | VALUE |                     |
| Alkaline Phosphatase Unit                       |            |       |                     |
| Gamma GT Unit                                   |            |       |                     |
| Total Bilirubin Unit                            |            |       |                     |
| Direct Bilirubin Unit                           |            |       |                     |
| CPK Unit                                        |            |       |                     |
| Glucose Unit                                    |            |       |                     |
| HbA1c Unit                                      |            |       |                     |
| Uric Acid Unit                                  |            |       |                     |
| Total Cholesterol Unit                          |            |       |                     |
| HDL Cholesterol Unit                            |            |       |                     |
| LDL Cholesterol Unit                            |            |       |                     |
| Triglycerides Unit                              |            |       |                     |
| Total Proteins Unit                             |            |       |                     |
| Albumin Unit                                    |            |       |                     |
| IGF-1 Unit                                      |            |       |                     |
| Leukocytes Unit                                 |            |       |                     |
| Platelets Unit                                  |            |       |                     |
| Erythrocytes Unit                               |            |       |                     |
| Hemoglobin Unit                                 |            |       |                     |
| Hematocrit Unit                                 |            |       |                     |
| Creatinine Assessment                           |            |       |                     |
| Urea Assessment                                 |            |       |                     |
| BUN Assessment                                  |            |       |                     |
| Sodium Assessment                               |            |       |                     |
| Potassium Assessment                            |            |       |                     |
| Calcium Assessment                              |            |       |                     |
| Phosphorus Assessment                           |            |       |                     |
| GOT(AST) Assessment                             |            |       |                     |
| GPT(ALT) Assessment                             |            |       |                     |
| Alkaline Phosphatase Assessment                 |            |       |                     |
| Gamma GT Assessment                             |            |       |                     |
| Total Bilirubin Assessment                      |            |       |                     |
| Direct Bilirubin Assessment                     |            |       |                     |
| CPK Assessment                                  |            |       |                     |
| Glucose Assessment                              |            |       |                     |
| HbA1c Assessment                                |            |       |                     |
| Uric Acid Assessment                            |            |       |                     |
| Total Cholesterol Assessment                    |            |       |                     |
| HDL Cholesterol Assessment                      |            |       |                     |
| LDL Cholesterol Assessment                      |            |       |                     |

| BLOOD LABORATORY EXAMINATIONS FORM DATA SUMMARY |            |                 |                     |
|-------------------------------------------------|------------|-----------------|---------------------|
| PATIENT NUMBER: 666-01                          | VISIT: v14 | ROW:            | VISIT DATE: No date |
| FIELD                                           |            | VALUE           |                     |
| Triglycerides Assessment                        |            |                 |                     |
| Total Proteins Assessment                       |            |                 |                     |
| Albumin Assessment                              |            |                 |                     |
| IGF-1 Assessment                                |            |                 |                     |
| Leukocytes Assessment                           |            |                 |                     |
| Platelets Assessment                            |            |                 |                     |
| Erythrocytes Assessment                         |            |                 |                     |
| Hemoglobin Assessment                           |            |                 |                     |
| Hematocrit Assessment                           |            |                 |                     |
| INSERTED ON: 2011-10-10 14:49:44                |            | BY: Demo Demo   | LOCKED: NO          |
| PRINTED ON: 2011-10-10 15:36:43                 |            | BY: Nadia Rubis |                     |



# SPIRAL COMPUTED TOMOGRAPHY FORM DATA SUMMARY

USER: Nadia Rubis

CENTER: -

PATIENT NUMBER: 666-01

VISIT: v02

ROW:

VISIT DATE: No date

| FIELD                                | VALUE |
|--------------------------------------|-------|
| Date of Examination                  |       |
| Pathological Findings                |       |
| Pathological Findings Specify        |       |
| Total Kidney Volume                  |       |
| Total Renal Cyst Volume              |       |
| Total Renal Intermediate Volume      |       |
| Total Renal Parenchyma Volume        |       |
| Total Liver Volume                   |       |
| Total Liver Cyst Volume              |       |
| Total Kidney Volume Unit             |       |
| Total Renal Cyst Volume Unit         |       |
| Total Renal Intermediate Volume Unit |       |
| Total Renal Parenchyma Volume Unit   |       |
| Total Liver Volume Unit              |       |
| Total Liver Cyst Volume Unit         |       |
| Notes                                |       |

INSERTED ON: 2011-10-10 14:49:53

BY: Demo Demo

LOCKED: NO

PRINTED ON: 2011-10-10 15:36:43

BY: Nadia Rubis

|                        |            |      |                     |
|------------------------|------------|------|---------------------|
| PATIENT NUMBER: 666-01 | VISIT: v06 | ROW: | VISIT DATE: No date |
|------------------------|------------|------|---------------------|

  

| FIELD                                | VALUE |
|--------------------------------------|-------|
| Date of Examination                  |       |
| Pathological Findings                |       |
| Pathological Findings Specify        |       |
| Total Kidney Volume                  |       |
| Total Renal Cyst Volume              |       |
| Total Renal Intermediate Volume      |       |
| Total Renal Parenchyma Volume        |       |
| Total Liver Volume                   |       |
| Total Liver Cyst Volume              |       |
| Total Kidney Volume Unit             |       |
| Total Renal Cyst Volume Unit         |       |
| Total Renal Intermediate Volume Unit |       |
| Total Renal Parenchyma Volume Unit   |       |
| Total Liver Volume Unit              |       |
| Total Liver Cyst Volume Unit         |       |
| Notes                                |       |

  

|                                  |                 |            |
|----------------------------------|-----------------|------------|
| INSERTED ON: 2011-10-10 14:49:57 | BY: Demo Demo   | LOCKED: NO |
| PRINTED ON: 2011-10-10 15:36:43  | BY: Nadia Rubis |            |

|                        |  |            |      |                     |
|------------------------|--|------------|------|---------------------|
| PATIENT NUMBER: 666-01 |  | VISIT: v14 | ROW: | VISIT DATE: No date |
|------------------------|--|------------|------|---------------------|

| FIELD                                | VALUE |
|--------------------------------------|-------|
| Date of Examination                  |       |
| Pathological Findings                |       |
| Pathological Findings Specify        |       |
| Total Kidney Volume                  |       |
| Total Renal Cyst Volume              |       |
| Total Renal Intermediate Volume      |       |
| Total Renal Parenchyma Volume        |       |
| Total Liver Volume                   |       |
| Total Liver Cyst Volume              |       |
| Total Kidney Volume Unit             |       |
| Total Renal Cyst Volume Unit         |       |
| Total Renal Intermediate Volume Unit |       |
| Total Renal Parenchyma Volume Unit   |       |
| Total Liver Volume Unit              |       |
| Total Liver Cyst Volume Unit         |       |
| Notes                                |       |

|                                  |                 |            |
|----------------------------------|-----------------|------------|
| INSERTED ON: 2011-10-10 14:50:01 | BY: Demo Demo   | LOCKED: NO |
| PRINTED ON: 2011-10-10 15:36:43  | BY: Nadia Rubis |            |



| GALLBLADDER/KIDNEY ULTRASONOGRAPHY FORM DATA SUMMARY |           |
|------------------------------------------------------|-----------|
| USER: Nadia Rubis                                    | CENTER: - |

|                        |            |      |                     |
|------------------------|------------|------|---------------------|
| PATIENT NUMBER: 666-01 | VISIT: v02 | ROW: | VISIT DATE: No date |
|------------------------|------------|------|---------------------|

| FIELD                                           | VALUE |
|-------------------------------------------------|-------|
| Date of Gallbladder Ultrasonography             |       |
| Gallbladder Sand                                |       |
| Gallbladder Stones                              |       |
| Other Gallbladder Pathological Findings         |       |
| Other Gallbladder Pathological Findings Specify |       |
| Date of Kidney Ultrasonography                  |       |
| Renal Stones                                    |       |
| Other Kidney Pathological Findings              |       |
| Other Kidney Pathological Findings Specify      |       |

|                                  |                 |            |
|----------------------------------|-----------------|------------|
| INSERTED ON: 2011-10-10 14:50:09 | BY: Demo Demo   | LOCKED: NO |
| PRINTED ON: 2011-10-10 15:36:43  | BY: Nadia Rubis |            |

| PATIENT NUMBER: 666-01                          | VISIT: v03      | ROW:  | VISIT DATE: No date |
|-------------------------------------------------|-----------------|-------|---------------------|
| FIELD                                           |                 | VALUE |                     |
| Date of Gallbladder Ultrasonography             |                 |       |                     |
| Gallbladder Sand                                |                 |       |                     |
| Gallbladder Stones                              |                 |       |                     |
| Other Gallbladder Pathological Findings         |                 |       |                     |
| Other Gallbladder Pathological Findings Specify |                 |       |                     |
| Date of Kidney Ultrasonography                  |                 |       |                     |
| Renal Stones                                    |                 |       |                     |
| Other Kidney Pathological Findings              |                 |       |                     |
| Other Kidney Pathological Findings Specify      |                 |       |                     |
| INSERTED ON: 2011-10-10 14:50:16                | BY: Demo Demo   |       | LOCKED: NO          |
| PRINTED ON: 2011-10-10 15:36:43                 | BY: Nadia Rubis |       |                     |

| PATIENT NUMBER: 666-01                          | VISIT: v04      | ROW:  | VISIT DATE: No date |
|-------------------------------------------------|-----------------|-------|---------------------|
| FIELD                                           |                 | VALUE |                     |
| Date of Gallbladder Ultrasonography             |                 |       |                     |
| Gallbladder Sand                                |                 |       |                     |
| Gallbladder Stones                              |                 |       |                     |
| Other Gallbladder Pathological Findings         |                 |       |                     |
| Other Gallbladder Pathological Findings Specify |                 |       |                     |
| Date of Kidney Ultrasonography                  |                 |       |                     |
| Renal Stones                                    |                 |       |                     |
| Other Kidney Pathological Findings              |                 |       |                     |
| Other Kidney Pathological Findings Specify      |                 |       |                     |
| INSERTED ON: 2011-10-10 14:50:21                | BY: Demo Demo   |       | LOCKED: NO          |
| PRINTED ON: 2011-10-10 15:36:43                 | BY: Nadia Rubis |       |                     |

|                                                 |                 |       |                     |
|-------------------------------------------------|-----------------|-------|---------------------|
| PATIENT NUMBER: 666-01                          | VISIT: v05      | ROW:  | VISIT DATE: No date |
| FIELD                                           |                 | VALUE |                     |
| Date of Gallbladder Ultrasonography             |                 |       |                     |
| Gallbladder Sand                                |                 |       |                     |
| Gallbladder Stones                              |                 |       |                     |
| Other Gallbladder Pathological Findings         |                 |       |                     |
| Other Gallbladder Pathological Findings Specify |                 |       |                     |
| Date of Kidney Ultrasonography                  |                 |       |                     |
| Renal Stones                                    |                 |       |                     |
| Other Kidney Pathological Findings              |                 |       |                     |
| Other Kidney Pathological Findings Specify      |                 |       |                     |
| INSERTED ON: 2011-10-10 14:50:28                | BY: Demo Demo   |       | LOCKED: NO          |
| PRINTED ON: 2011-10-10 15:36:43                 | BY: Nadia Rubis |       |                     |

| PATIENT NUMBER: 666-01                          | VISIT: v06      | ROW:  | VISIT DATE: No date |
|-------------------------------------------------|-----------------|-------|---------------------|
| FIELD                                           |                 | VALUE |                     |
| Date of Gallbladder Ultrasonography             |                 |       |                     |
| Gallbladder Sand                                |                 |       |                     |
| Gallbladder Stones                              |                 |       |                     |
| Other Gallbladder Pathological Findings         |                 |       |                     |
| Other Gallbladder Pathological Findings Specify |                 |       |                     |
| Date of Kidney Ultrasonography                  |                 |       |                     |
| Renal Stones                                    |                 |       |                     |
| Other Kidney Pathological Findings              |                 |       |                     |
| Other Kidney Pathological Findings Specify      |                 |       |                     |
| INSERTED ON: 2011-10-10 14:50:34                | BY: Demo Demo   |       | LOCKED: NO          |
| PRINTED ON: 2011-10-10 15:36:43                 | BY: Nadia Rubis |       |                     |

| PATIENT NUMBER: 666-01                          | VISIT: v07      | ROW:  | VISIT DATE: No date |
|-------------------------------------------------|-----------------|-------|---------------------|
| FIELD                                           |                 | VALUE |                     |
| Date of Gallbladder Ultrasonography             |                 |       |                     |
| Gallbladder Sand                                |                 |       |                     |
| Gallbladder Stones                              |                 |       |                     |
| Other Gallbladder Pathological Findings         |                 |       |                     |
| Other Gallbladder Pathological Findings Specify |                 |       |                     |
| Date of Kidney Ultrasonography                  |                 |       |                     |
| Renal Stones                                    |                 |       |                     |
| Other Kidney Pathological Findings              |                 |       |                     |
| Other Kidney Pathological Findings Specify      |                 |       |                     |
| INSERTED ON: 2011-10-10 14:50:40                | BY: Demo Demo   |       | LOCKED: NO          |
| PRINTED ON: 2011-10-10 15:36:43                 | BY: Nadia Rubis |       |                     |

| PATIENT NUMBER: 666-01                          | VISIT: v08      | ROW:  | VISIT DATE: No date |
|-------------------------------------------------|-----------------|-------|---------------------|
| FIELD                                           |                 | VALUE |                     |
| Date of Gallbladder Ultrasonography             |                 |       |                     |
| Gallbladder Sand                                |                 |       |                     |
| Gallbladder Stones                              |                 |       |                     |
| Other Gallbladder Pathological Findings         |                 |       |                     |
| Other Gallbladder Pathological Findings Specify |                 |       |                     |
| Date of Kidney Ultrasonography                  |                 |       |                     |
| Renal Stones                                    |                 |       |                     |
| Other Kidney Pathological Findings              |                 |       |                     |
| Other Kidney Pathological Findings Specify      |                 |       |                     |
| INSERTED ON: 2011-10-10 14:50:46                | BY: Demo Demo   |       | LOCKED: NO          |
| PRINTED ON: 2011-10-10 15:36:43                 | BY: Nadia Rubis |       |                     |

| PATIENT NUMBER: 666-01                          | VISIT: v09      | ROW:  | VISIT DATE: No date |
|-------------------------------------------------|-----------------|-------|---------------------|
| FIELD                                           |                 | VALUE |                     |
| Date of Gallbladder Ultrasonography             |                 |       |                     |
| Gallbladder Sand                                |                 |       |                     |
| Gallbladder Stones                              |                 |       |                     |
| Other Gallbladder Pathological Findings         |                 |       |                     |
| Other Gallbladder Pathological Findings Specify |                 |       |                     |
| Date of Kidney Ultrasonography                  |                 |       |                     |
| Renal Stones                                    |                 |       |                     |
| Other Kidney Pathological Findings              |                 |       |                     |
| Other Kidney Pathological Findings Specify      |                 |       |                     |
| INSERTED ON: 2011-10-10 14:50:52                | BY: Demo Demo   |       | LOCKED: NO          |
| PRINTED ON: 2011-10-10 15:36:43                 | BY: Nadia Rubis |       |                     |

|                                                 |                 |       |                     |
|-------------------------------------------------|-----------------|-------|---------------------|
| PATIENT NUMBER: 666-01                          | VISIT: v10      | ROW:  | VISIT DATE: No date |
| FIELD                                           |                 | VALUE |                     |
| Date of Gallbladder Ultrasonography             |                 |       |                     |
| Gallbladder Sand                                |                 |       |                     |
| Gallbladder Stones                              |                 |       |                     |
| Other Gallbladder Pathological Findings         |                 |       |                     |
| Other Gallbladder Pathological Findings Specify |                 |       |                     |
| Date of Kidney Ultrasonography                  |                 |       |                     |
| Renal Stones                                    |                 |       |                     |
| Other Kidney Pathological Findings              |                 |       |                     |
| Other Kidney Pathological Findings Specify      |                 |       |                     |
| INSERTED ON: 2011-10-10 14:50:58                | BY: Demo Demo   |       | LOCKED: NO          |
| PRINTED ON: 2011-10-10 15:36:43                 | BY: Nadia Rubis |       |                     |

| PATIENT NUMBER: 666-01                          | VISIT: v11      | ROW:  | VISIT DATE: No date |
|-------------------------------------------------|-----------------|-------|---------------------|
| FIELD                                           |                 | VALUE |                     |
| Date of Gallbladder Ultrasonography             |                 |       |                     |
| Gallbladder Sand                                |                 |       |                     |
| Gallbladder Stones                              |                 |       |                     |
| Other Gallbladder Pathological Findings         |                 |       |                     |
| Other Gallbladder Pathological Findings Specify |                 |       |                     |
| Date of Kidney Ultrasonography                  |                 |       |                     |
| Renal Stones                                    |                 |       |                     |
| Other Kidney Pathological Findings              |                 |       |                     |
| Other Kidney Pathological Findings Specify      |                 |       |                     |
| INSERTED ON: 2011-10-10 14:51:06                | BY: Demo Demo   |       | LOCKED: NO          |
| PRINTED ON: 2011-10-10 15:36:43                 | BY: Nadia Rubis |       |                     |

| PATIENT NUMBER: 666-01                          | VISIT: v12      | ROW:  | VISIT DATE: No date |
|-------------------------------------------------|-----------------|-------|---------------------|
| FIELD                                           |                 | VALUE |                     |
| Date of Gallbladder Ultrasonography             |                 |       |                     |
| Gallbladder Sand                                |                 |       |                     |
| Gallbladder Stones                              |                 |       |                     |
| Other Gallbladder Pathological Findings         |                 |       |                     |
| Other Gallbladder Pathological Findings Specify |                 |       |                     |
| Date of Kidney Ultrasonography                  |                 |       |                     |
| Renal Stones                                    |                 |       |                     |
| Other Kidney Pathological Findings              |                 |       |                     |
| Other Kidney Pathological Findings Specify      |                 |       |                     |
| INSERTED ON: 2011-10-10 14:51:12                | BY: Demo Demo   |       | LOCKED: NO          |
| PRINTED ON: 2011-10-10 15:36:43                 | BY: Nadia Rubis |       |                     |

| PATIENT NUMBER: 666-01                          | VISIT: v13      | ROW:  | VISIT DATE: No date |
|-------------------------------------------------|-----------------|-------|---------------------|
| FIELD                                           |                 | VALUE |                     |
| Date of Gallbladder Ultrasonography             |                 |       |                     |
| Gallbladder Sand                                |                 |       |                     |
| Gallbladder Stones                              |                 |       |                     |
| Other Gallbladder Pathological Findings         |                 |       |                     |
| Other Gallbladder Pathological Findings Specify |                 |       |                     |
| Date of Kidney Ultrasonography                  |                 |       |                     |
| Renal Stones                                    |                 |       |                     |
| Other Kidney Pathological Findings              |                 |       |                     |
| Other Kidney Pathological Findings Specify      |                 |       |                     |
| INSERTED ON: 2011-10-10 14:51:18                | BY: Demo Demo   |       | LOCKED: NO          |
| PRINTED ON: 2011-10-10 15:36:43                 | BY: Nadia Rubis |       |                     |

| PATIENT NUMBER: 666-01                          | VISIT: v14      | ROW:  | VISIT DATE: No date |
|-------------------------------------------------|-----------------|-------|---------------------|
| FIELD                                           |                 | VALUE |                     |
| Date of Gallbladder Ultrasonography             |                 |       |                     |
| Gallbladder Sand                                |                 |       |                     |
| Gallbladder Stones                              |                 |       |                     |
| Other Gallbladder Pathological Findings         |                 |       |                     |
| Other Gallbladder Pathological Findings Specify |                 |       |                     |
| Date of Kidney Ultrasonography                  |                 |       |                     |
| Renal Stones                                    |                 |       |                     |
| Other Kidney Pathological Findings              |                 |       |                     |
| Other Kidney Pathological Findings Specify      |                 |       |                     |
| INSERTED ON: 2011-10-10 14:51:23                | BY: Demo Demo   |       | LOCKED: NO          |
| PRINTED ON: 2011-10-10 15:36:43                 | BY: Nadia Rubis |       |                     |



## 24H URINE COLLECTIONS - OVERNIGHT URINE COLLECTION - PAH/IOHEXOL PLASMA CLEARANCE FORM DATA SUMMARY

USER: Nadia Rubis

CENTER: -

|                        |            |      |                     |
|------------------------|------------|------|---------------------|
| PATIENT NUMBER: 666-01 | VISIT: v02 | ROW: | VISIT DATE: No date |
|------------------------|------------|------|---------------------|

| FIELD                                    | VALUE |
|------------------------------------------|-------|
| End Date (24H Urine Collection)          |       |
| Duration-HH (24H Urine Collection)       |       |
| Duration-MM (24H Urine Collection)       |       |
| Volume (24H Urine Collection)            |       |
| Proteins                                 |       |
| Sodium                                   |       |
| Urea                                     |       |
| Glucose                                  |       |
| Phosphorus                               |       |
| Creatinine                               |       |
| Creatinine Clearance                     |       |
| End Date (Overnight Urine Collection)    |       |
| Duration-HH (Overnight Urine Collection) |       |
| Duration-MM (Overnight Urine Collection) |       |
| Volume (Overnight Urine Collection)      |       |
| Endothelin Excretion                     |       |
| MCP-1 Excretion                          |       |
| End Date (Pah-iohexol Plasma Clearance)  |       |
| GFR                                      |       |
| RPF                                      |       |
| Proteins Unit                            |       |
| Sodium Unit                              |       |
| Urea Unit                                |       |
| Glucose Unit                             |       |
| Phosphorus Unit                          |       |
| Creatinine Unit                          |       |
| Creatinine Clearance Unit                |       |
| Endothelin Excretion Unit                |       |
| MCP-1 Excretion Unit                     |       |
| GFR Unit                                 |       |
| RPF Unit                                 |       |

INSERTED ON: 2011-10-10 14:51:31

BY: Demo Demo

LOCKED: NO

PRINTED ON: 2011-10-10 15:36:43

BY: Nadia Rubis

|                        |            |      |                     |
|------------------------|------------|------|---------------------|
| PATIENT NUMBER: 666-01 | VISIT: v04 | ROW: | VISIT DATE: No date |
|------------------------|------------|------|---------------------|

  

| FIELD                                    | VALUE |
|------------------------------------------|-------|
| End Date (24H Urine Collection)          |       |
| Duration-HH (24H Urine Collection)       |       |
| Duration-MM (24H Urine Collection)       |       |
| Volume (24H Urine Collection)            |       |
| Proteins                                 |       |
| Sodium                                   |       |
| Urea                                     |       |
| Glucose                                  |       |
| Phosphorus                               |       |
| Creatinine                               |       |
| Creatinine Clearance                     |       |
| End Date (Overnight Urine Collection)    |       |
| Duration-HH (Overnight Urine Collection) |       |
| Duration-MM (Overnight Urine Collection) |       |
| Volume (Overnight Urine Collection)      |       |
| Endothelin Excretion                     |       |
| MCP-1 Excretion                          |       |
| End Date (Pah-lohexol Plasma Clearance)  |       |
| GFR                                      |       |
| RPF                                      |       |
| Proteins Unit                            |       |
| Sodium Unit                              |       |
| Urea Unit                                |       |
| Glucose Unit                             |       |
| Phosphorus Unit                          |       |
| Creatinine Unit                          |       |
| Creatinine Clearance Unit                |       |
| Endothelin Excretion Unit                |       |
| MCP-1 Excretion Unit                     |       |
| GFR Unit                                 |       |
| RPF Unit                                 |       |

  

|                                  |                 |            |
|----------------------------------|-----------------|------------|
| INSERTED ON: 2011-10-10 14:51:36 | BY: Demo Demo   | LOCKED: NO |
| PRINTED ON: 2011-10-10 15:36:43  | BY: Nadia Rubis |            |

|                        |            |      |                     |
|------------------------|------------|------|---------------------|
| PATIENT NUMBER: 666-01 | VISIT: v06 | ROW: | VISIT DATE: No date |
|------------------------|------------|------|---------------------|

  

| FIELD                                    | VALUE |
|------------------------------------------|-------|
| End Date (24H Urine Collection)          |       |
| Duration-HH (24H Urine Collection)       |       |
| Duration-MM (24H Urine Collection)       |       |
| Volume (24H Urine Collection)            |       |
| Proteins                                 |       |
| Sodium                                   |       |
| Urea                                     |       |
| Glucose                                  |       |
| Phosphorus                               |       |
| Creatinine                               |       |
| Creatinine Clearance                     |       |
| End Date (Overnight Urine Collection)    |       |
| Duration-HH (Overnight Urine Collection) |       |
| Duration-MM (Overnight Urine Collection) |       |
| Volume (Overnight Urine Collection)      |       |
| Endothelin Excretion                     |       |
| MCP-1 Excretion                          |       |
| End Date (Pah-lohexol Plasma Clearance)  |       |
| GFR                                      |       |
| RPF                                      |       |
| Proteins Unit                            |       |
| Sodium Unit                              |       |
| Urea Unit                                |       |
| Glucose Unit                             |       |
| Phosphorus Unit                          |       |
| Creatinine Unit                          |       |
| Creatinine Clearance Unit                |       |
| Endothelin Excretion Unit                |       |
| MCP-1 Excretion Unit                     |       |
| GFR Unit                                 |       |
| RPF Unit                                 |       |

  

|                                  |                 |            |
|----------------------------------|-----------------|------------|
| INSERTED ON: 2011-10-10 14:51:42 | BY: Demo Demo   | LOCKED: NO |
| PRINTED ON: 2011-10-10 15:36:44  | BY: Nadia Rubis |            |

|                        |            |      |                     |
|------------------------|------------|------|---------------------|
| PATIENT NUMBER: 666-01 | VISIT: v08 | ROW: | VISIT DATE: No date |
|------------------------|------------|------|---------------------|

  

| FIELD                                    | VALUE |
|------------------------------------------|-------|
| End Date (24H Urine Collection)          |       |
| Duration-HH (24H Urine Collection)       |       |
| Duration-MM (24H Urine Collection)       |       |
| Volume (24H Urine Collection)            |       |
| Proteins                                 |       |
| Sodium                                   |       |
| Urea                                     |       |
| Glucose                                  |       |
| Phosphorus                               |       |
| Creatinine                               |       |
| Creatinine Clearance                     |       |
| End Date (Overnight Urine Collection)    |       |
| Duration-HH (Overnight Urine Collection) |       |
| Duration-MM (Overnight Urine Collection) |       |
| Volume (Overnight Urine Collection)      |       |
| Endothelin Excretion                     |       |
| MCP-1 Excretion                          |       |
| End Date (Pah-lohexol Plasma Clearance)  |       |
| GFR                                      |       |
| RPF                                      |       |
| Proteins Unit                            |       |
| Sodium Unit                              |       |
| Urea Unit                                |       |
| Glucose Unit                             |       |
| Phosphorus Unit                          |       |
| Creatinine Unit                          |       |
| Creatinine Clearance Unit                |       |
| Endothelin Excretion Unit                |       |
| MCP-1 Excretion Unit                     |       |
| GFR Unit                                 |       |
| RPF Unit                                 |       |

  

|                                  |                 |            |
|----------------------------------|-----------------|------------|
| INSERTED ON: 2011-10-10 14:51:49 | BY: Demo Demo   | LOCKED: NO |
| PRINTED ON: 2011-10-10 15:36:44  | BY: Nadia Rubis |            |

|                        |            |      |                     |
|------------------------|------------|------|---------------------|
| PATIENT NUMBER: 666-01 | VISIT: v10 | ROW: | VISIT DATE: No date |
|------------------------|------------|------|---------------------|

  

| FIELD                                    | VALUE |
|------------------------------------------|-------|
| End Date (24H Urine Collection)          |       |
| Duration-HH (24H Urine Collection)       |       |
| Duration-MM (24H Urine Collection)       |       |
| Volume (24H Urine Collection)            |       |
| Proteins                                 |       |
| Sodium                                   |       |
| Urea                                     |       |
| Glucose                                  |       |
| Phosphorus                               |       |
| Creatinine                               |       |
| Creatinine Clearance                     |       |
| End Date (Overnight Urine Collection)    |       |
| Duration-HH (Overnight Urine Collection) |       |
| Duration-MM (Overnight Urine Collection) |       |
| Volume (Overnight Urine Collection)      |       |
| Endothelin Excretion                     |       |
| MCP-1 Excretion                          |       |
| End Date (Pah-lohexol Plasma Clearance)  |       |
| GFR                                      |       |
| RPF                                      |       |
| Proteins Unit                            |       |
| Sodium Unit                              |       |
| Urea Unit                                |       |
| Glucose Unit                             |       |
| Phosphorus Unit                          |       |
| Creatinine Unit                          |       |
| Creatinine Clearance Unit                |       |
| Endothelin Excretion Unit                |       |
| MCP-1 Excretion Unit                     |       |
| GFR Unit                                 |       |
| RPF Unit                                 |       |

  

|                                  |                 |            |
|----------------------------------|-----------------|------------|
| INSERTED ON: 2011-10-10 14:52:01 | BY: Demo Demo   | LOCKED: NO |
| PRINTED ON: 2011-10-10 15:36:44  | BY: Nadia Rubis |            |

|                        |            |      |                     |
|------------------------|------------|------|---------------------|
| PATIENT NUMBER: 666-01 | VISIT: v12 | ROW: | VISIT DATE: No date |
|------------------------|------------|------|---------------------|

  

| FIELD                                    | VALUE |
|------------------------------------------|-------|
| End Date (24H Urine Collection)          |       |
| Duration-HH (24H Urine Collection)       |       |
| Duration-MM (24H Urine Collection)       |       |
| Volume (24H Urine Collection)            |       |
| Proteins                                 |       |
| Sodium                                   |       |
| Urea                                     |       |
| Glucose                                  |       |
| Phosphorus                               |       |
| Creatinine                               |       |
| Creatinine Clearance                     |       |
| End Date (Overnight Urine Collection)    |       |
| Duration-HH (Overnight Urine Collection) |       |
| Duration-MM (Overnight Urine Collection) |       |
| Volume (Overnight Urine Collection)      |       |
| Endothelin Excretion                     |       |
| MCP-1 Excretion                          |       |
| End Date (Pah-lohexol Plasma Clearance)  |       |
| GFR                                      |       |
| RPF                                      |       |
| Proteins Unit                            |       |
| Sodium Unit                              |       |
| Urea Unit                                |       |
| Glucose Unit                             |       |
| Phosphorus Unit                          |       |
| Creatinine Unit                          |       |
| Creatinine Clearance Unit                |       |
| Endothelin Excretion Unit                |       |
| MCP-1 Excretion Unit                     |       |
| GFR Unit                                 |       |
| RPF Unit                                 |       |

  

|                                  |                 |            |
|----------------------------------|-----------------|------------|
| INSERTED ON: 2011-10-10 14:52:07 | BY: Demo Demo   | LOCKED: NO |
| PRINTED ON: 2011-10-10 15:36:44  | BY: Nadia Rubis |            |

|                        |            |      |                     |
|------------------------|------------|------|---------------------|
| PATIENT NUMBER: 666-01 | VISIT: v14 | ROW: | VISIT DATE: No date |
|------------------------|------------|------|---------------------|

  

| FIELD                                    | VALUE |
|------------------------------------------|-------|
| End Date (24H Urine Collection)          |       |
| Duration-HH (24H Urine Collection)       |       |
| Duration-MM (24H Urine Collection)       |       |
| Volume (24H Urine Collection)            |       |
| Proteins                                 |       |
| Sodium                                   |       |
| Urea                                     |       |
| Glucose                                  |       |
| Phosphorus                               |       |
| Creatinine                               |       |
| Creatinine Clearance                     |       |
| End Date (Overnight Urine Collection)    |       |
| Duration-HH (Overnight Urine Collection) |       |
| Duration-MM (Overnight Urine Collection) |       |
| Volume (Overnight Urine Collection)      |       |
| Endothelin Excretion                     |       |
| MCP-1 Excretion                          |       |
| End Date (Pah-lohexol Plasma Clearance)  |       |
| GFR                                      |       |
| RPF                                      |       |
| Proteins Unit                            |       |
| Sodium Unit                              |       |
| Urea Unit                                |       |
| Glucose Unit                             |       |
| Phosphorus Unit                          |       |
| Creatinine Unit                          |       |
| Creatinine Clearance Unit                |       |
| Endothelin Excretion Unit                |       |
| MCP-1 Excretion Unit                     |       |
| GFR Unit                                 |       |
| RPF Unit                                 |       |

  

|                                  |                 |            |
|----------------------------------|-----------------|------------|
| INSERTED ON: 2011-10-10 14:52:11 | BY: Demo Demo   | LOCKED: NO |
| PRINTED ON: 2011-10-10 15:36:44  | BY: Nadia Rubis |            |



# URINE ANALYSIS FORM DATA SUMMARY

USER: Nadia Rubis

CENTER: -

PATIENT NUMBER: 666-01

VISIT: v02

ROW:

VISIT DATE: No date

| FIELD           | VALUE |
|-----------------|-------|
| Date of Sample  |       |
| Proteins        |       |
| Albumin         |       |
| Creatinine      |       |
| Proteins Unit   |       |
| Albumin Unit    |       |
| Creatinine Unit |       |

INSERTED ON: 2011-10-10 14:52:24

BY: Demo Demo

LOCKED: NO

PRINTED ON: 2011-10-10 15:36:44

BY: Nadia Rubis

|                                  |                 |       |                     |
|----------------------------------|-----------------|-------|---------------------|
| PATIENT NUMBER: 666-01           | VISIT: v03      | ROW:  | VISIT DATE: No date |
| FIELD                            |                 | VALUE |                     |
| Date of Sample                   |                 |       |                     |
| Proteins                         |                 |       |                     |
| Albumin                          |                 |       |                     |
| Creatinine                       |                 |       |                     |
| Proteins Unit                    |                 |       |                     |
| Albumin Unit                     |                 |       |                     |
| Creatinine Unit                  |                 |       |                     |
| INSERTED ON: 2011-10-10 14:52:28 | BY: Demo Demo   |       | LOCKED: NO          |
| PRINTED ON: 2011-10-10 15:36:44  | BY: Nadia Rubis |       |                     |

|                                  |                 |       |                     |
|----------------------------------|-----------------|-------|---------------------|
| PATIENT NUMBER: 666-01           | VISIT: v04      | ROW:  | VISIT DATE: No date |
| FIELD                            |                 | VALUE |                     |
| Date of Sample                   |                 |       |                     |
| Proteins                         |                 |       |                     |
| Albumin                          |                 |       |                     |
| Creatinine                       |                 |       |                     |
| Proteins Unit                    |                 |       |                     |
| Albumin Unit                     |                 |       |                     |
| Creatinine Unit                  |                 |       |                     |
| INSERTED ON: 2011-10-10 14:52:31 | BY: Demo Demo   |       | LOCKED: NO          |
| PRINTED ON: 2011-10-10 15:36:44  | BY: Nadia Rubis |       |                     |

| PATIENT NUMBER: 666-01           | VISIT: v05 | ROW:            | VISIT DATE: No date |
|----------------------------------|------------|-----------------|---------------------|
| FIELD                            |            | VALUE           |                     |
| Date of Sample                   |            |                 |                     |
| Proteins                         |            |                 |                     |
| Albumin                          |            |                 |                     |
| Creatinine                       |            |                 |                     |
| Proteins Unit                    |            |                 |                     |
| Albumin Unit                     |            |                 |                     |
| Creatinine Unit                  |            |                 |                     |
| INSERTED ON: 2011-10-10 14:52:35 |            | BY: Demo Demo   | LOCKED: NO          |
| PRINTED ON: 2011-10-10 15:36:44  |            | BY: Nadia Rubis |                     |

| PATIENT NUMBER: 666-01           | VISIT: v06 | ROW:            | VISIT DATE: No date |
|----------------------------------|------------|-----------------|---------------------|
| FIELD                            |            | VALUE           |                     |
| Date of Sample                   |            |                 |                     |
| Proteins                         |            |                 |                     |
| Albumin                          |            |                 |                     |
| Creatinine                       |            |                 |                     |
| Proteins Unit                    |            |                 |                     |
| Albumin Unit                     |            |                 |                     |
| Creatinine Unit                  |            |                 |                     |
| INSERTED ON: 2011-10-10 14:52:48 |            | BY: Demo Demo   | LOCKED: NO          |
| PRINTED ON: 2011-10-10 15:36:44  |            | BY: Nadia Rubis |                     |

|                                  |                 |       |                     |
|----------------------------------|-----------------|-------|---------------------|
| PATIENT NUMBER: 666-01           | VISIT: v07      | ROW:  | VISIT DATE: No date |
| FIELD                            |                 | VALUE |                     |
| Date of Sample                   |                 |       |                     |
| Proteins                         |                 |       |                     |
| Albumin                          |                 |       |                     |
| Creatinine                       |                 |       |                     |
| Proteins Unit                    |                 |       |                     |
| Albumin Unit                     |                 |       |                     |
| Creatinine Unit                  |                 |       |                     |
| INSERTED ON: 2011-10-10 14:52:52 | BY: Demo Demo   |       | LOCKED: NO          |
| PRINTED ON: 2011-10-10 15:36:44  | BY: Nadia Rubis |       |                     |

|                                  |                 |       |                     |
|----------------------------------|-----------------|-------|---------------------|
| PATIENT NUMBER: 666-01           | VISIT: v08      | ROW:  | VISIT DATE: No date |
| FIELD                            |                 | VALUE |                     |
| Date of Sample                   |                 |       |                     |
| Proteins                         |                 |       |                     |
| Albumin                          |                 |       |                     |
| Creatinine                       |                 |       |                     |
| Proteins Unit                    |                 |       |                     |
| Albumin Unit                     |                 |       |                     |
| Creatinine Unit                  |                 |       |                     |
| INSERTED ON: 2011-10-10 14:52:55 | BY: Demo Demo   |       | LOCKED: NO          |
| PRINTED ON: 2011-10-10 15:36:44  | BY: Nadia Rubis |       |                     |

| PATIENT NUMBER: 666-01           | VISIT: v09 | ROW:            | VISIT DATE: No date |
|----------------------------------|------------|-----------------|---------------------|
| FIELD                            |            | VALUE           |                     |
| Date of Sample                   |            |                 |                     |
| Proteins                         |            |                 |                     |
| Albumin                          |            |                 |                     |
| Creatinine                       |            |                 |                     |
| Proteins Unit                    |            |                 |                     |
| Albumin Unit                     |            |                 |                     |
| Creatinine Unit                  |            |                 |                     |
| INSERTED ON: 2011-10-10 14:52:59 |            | BY: Demo Demo   | LOCKED: NO          |
| PRINTED ON: 2011-10-10 15:36:44  |            | BY: Nadia Rubis |                     |

|                                  |                 |       |                     |
|----------------------------------|-----------------|-------|---------------------|
| PATIENT NUMBER: 666-01           | VISIT: v10      | ROW:  | VISIT DATE: No date |
| FIELD                            |                 | VALUE |                     |
| Date of Sample                   |                 |       |                     |
| Proteins                         |                 |       |                     |
| Albumin                          |                 |       |                     |
| Creatinine                       |                 |       |                     |
| Proteins Unit                    |                 |       |                     |
| Albumin Unit                     |                 |       |                     |
| Creatinine Unit                  |                 |       |                     |
| INSERTED ON: 2011-10-10 14:53:03 | BY: Demo Demo   |       | LOCKED: NO          |
| PRINTED ON: 2011-10-10 15:36:44  | BY: Nadia Rubis |       |                     |

| PATIENT NUMBER: 666-01           | VISIT: v11 | ROW:            | VISIT DATE: No date |
|----------------------------------|------------|-----------------|---------------------|
| FIELD                            |            | VALUE           |                     |
| Date of Sample                   |            |                 |                     |
| Proteins                         |            |                 |                     |
| Albumin                          |            |                 |                     |
| Creatinine                       |            |                 |                     |
| Proteins Unit                    |            |                 |                     |
| Albumin Unit                     |            |                 |                     |
| Creatinine Unit                  |            |                 |                     |
| INSERTED ON: 2011-10-10 14:53:06 |            | BY: Demo Demo   | LOCKED: NO          |
| PRINTED ON: 2011-10-10 15:36:44  |            | BY: Nadia Rubis |                     |

|                                  |                 |       |                     |
|----------------------------------|-----------------|-------|---------------------|
| PATIENT NUMBER: 666-01           | VISIT: v12      | ROW:  | VISIT DATE: No date |
| FIELD                            |                 | VALUE |                     |
| Date of Sample                   |                 |       |                     |
| Proteins                         |                 |       |                     |
| Albumin                          |                 |       |                     |
| Creatinine                       |                 |       |                     |
| Proteins Unit                    |                 |       |                     |
| Albumin Unit                     |                 |       |                     |
| Creatinine Unit                  |                 |       |                     |
| INSERTED ON: 2011-10-10 14:53:10 | BY: Demo Demo   |       | LOCKED: NO          |
| PRINTED ON: 2011-10-10 15:36:44  | BY: Nadia Rubis |       |                     |

|                                  |                 |       |                     |
|----------------------------------|-----------------|-------|---------------------|
| PATIENT NUMBER: 666-01           | VISIT: v13      | ROW:  | VISIT DATE: No date |
| FIELD                            |                 | VALUE |                     |
| Date of Sample                   |                 |       |                     |
| Proteins                         |                 |       |                     |
| Albumin                          |                 |       |                     |
| Creatinine                       |                 |       |                     |
| Proteins Unit                    |                 |       |                     |
| Albumin Unit                     |                 |       |                     |
| Creatinine Unit                  |                 |       |                     |
| INSERTED ON: 2011-10-10 14:53:14 | BY: Demo Demo   |       | LOCKED: NO          |
| PRINTED ON: 2011-10-10 15:36:44  | BY: Nadia Rubis |       |                     |

|                                  |                 |       |                     |
|----------------------------------|-----------------|-------|---------------------|
| PATIENT NUMBER: 666-01           | VISIT: v14      | ROW:  | VISIT DATE: No date |
| FIELD                            |                 | VALUE |                     |
| Date of Sample                   |                 |       |                     |
| Proteins                         |                 |       |                     |
| Albumin                          |                 |       |                     |
| Creatinine                       |                 |       |                     |
| Proteins Unit                    |                 |       |                     |
| Albumin Unit                     |                 |       |                     |
| Creatinine Unit                  |                 |       |                     |
| INSERTED ON: 2011-10-10 14:53:18 | BY: Demo Demo   |       | LOCKED: NO          |
| PRINTED ON: 2011-10-10 15:36:44  | BY: Nadia Rubis |       |                     |



# ELIGIBILITY TESTS FORM DATA SUMMARY

USER: Nadia Rubis

CENTER: -

PATIENT NUMBER: 666-01

VISIT: v01

ROW:

VISIT DATE: No date

| FIELD                                                | VALUE |
|------------------------------------------------------|-------|
| Date of Sample (Blood Exam)                          |       |
| Creatinine                                           |       |
| Glucose                                              |       |
| HbA1c                                                |       |
| Creatinine Unit                                      |       |
| Glucose Unit                                         |       |
| HbA1c Unit                                           |       |
| Date of Sample (24H Urine)                           |       |
| Proteins                                             |       |
| Proteins Unit                                        |       |
| GFR                                                  | 0     |
| Date of Examination (Kidney Ultrasonography)         |       |
| ADPKD                                                |       |
| Other Pathological Findings (Kidney Ultrasonography) |       |
| Other Pathological Findings Specify                  |       |
| Date of Examination (Liver Ultrasonography)          |       |
| Liver Polycystosis                                   |       |
| Other Pathological Findings (Liver Ultrasonography)  |       |
| Other Pathological Findings Specify                  |       |

INSERTED ON: 2011-10-10 14:53:28

BY: Demo Demo

LOCKED: NO

PRINTED ON: 2011-10-10 15:36:44

BY: Nadia Rubis



# INCLUSION/EXCLUSION CRITERIA FORM DATA SUMMARY

USER: Nadia Rubis

CENTER: -

PATIENT NUMBER: 666-01

VISIT: v02

ROW:

VISIT DATE: No date

| FIELD                                                                                                                                           | VALUE |
|-------------------------------------------------------------------------------------------------------------------------------------------------|-------|
| Age > 18 years                                                                                                                                  |       |
| Clinical and ultrasound diagnosis of ADPKD                                                                                                      |       |
| Estimated GFR between 15 and 40 mL/min/1.73m <sup>2</sup> (by the MDRD 4 variable equation)                                                     |       |
| Written informed consent                                                                                                                        |       |
| 24-h urinary protein excretion rate > 3g (suggestive of a concomitant glomerular disease that could benefit of specific therapy)                |       |
| Symptomatic urinary tract lithiasis or obstruction                                                                                              |       |
| Uncontrolled diabetes mellitus (HbA1c > 8%) or hypertension (systolic/diastolic BP > 180/110 mmHg)                                              |       |
| Current urinary tract infection                                                                                                                 |       |
| Symptomatic biliary tract lithiasis                                                                                                             |       |
| Active cancer                                                                                                                                   |       |
| Psychiatric disorders or any condition that might prevent full comprehension of the purposes and risks of the study                             |       |
| Pregnancy, lactation or child bearing potential and ineffective contraception (estrogen therapy in post menopausal women should not be stopped) |       |

INSERTED ON: 2011-10-10 14:53:35

BY: Demo Demo

LOCKED: NO

PRINTED ON: 2011-10-10 15:36:44

BY: Nadia Rubis



# RANDOMIZATION FORM DATA SUMMARY

USER: Nadia Rubis

CENTER: -

PATIENT NUMBER: 666-01

VISIT: v02

ROW:

VISIT DATE: No date

| FIELD                                | VALUE |
|--------------------------------------|-------|
| Has the patient been randomized?     |       |
| Randomization Date                   |       |
| Patient Number                       |       |
| Protocol Violation                   |       |
| Inadherence to In/Exclusion Criteria |       |
| Lost to Follow-up                    |       |
| Withdrawal of Consent                |       |
| Concomitant Disease                  |       |
| Death                                |       |

INSERTED ON: 2011-10-10 14:53:40

BY: Demo Demo

LOCKED: NO

PRINTED ON: 2011-10-10 15:36:44

BY: Nadia Rubis



# INVESTIGATIONAL MEDICINAL PRODUCT ADMINISTRATION FORM DATA SUMMARY

USER: Nadia Rubis

CENTER: -

PATIENT NUMBER: 666-01

VISIT:

ROW:

VISIT DATE: No date

| FIELD         | VALUE |
|---------------|-------|
| Row 1 Yes/No  |       |
| Row 2 Yes/No  |       |
| Row 3 Yes/No  |       |
| Row 4 Yes/No  |       |
| Row 5 Yes/No  |       |
| Row 6 Yes/No  |       |
| Row 7 Yes/No  |       |
| Row 8 Yes/No  |       |
| Row 9 Yes/No  |       |
| Row 10 Yes/No |       |
| Row 11 Yes/No |       |
| Row 12 Yes/No |       |
| Row 13 Yes/No |       |
| Row 14 Yes/No |       |
| Row 15 Yes/No |       |
| Row 16 Yes/No |       |
| Row 17 Yes/No |       |
| Row 18 Yes/No |       |
| Row 19 Yes/No |       |
| Row 20 Yes/No |       |
| Row 21 Yes/No |       |
| Row 22 Yes/No |       |
| Row 23 Yes/No |       |
| Row 24 Yes/No |       |
| Row 25 Yes/No |       |
| Row 26 Yes/No |       |
| Row 27 Yes/No |       |
| Row 28 Yes/No |       |
| Row 29 Yes/No |       |
| Row 30 Yes/No |       |
| Row 31 Yes/No |       |
| Row 32 Yes/No |       |
| Row 33 Yes/No |       |
| Row 34 Yes/No |       |

| INVESTIGATIONAL MEDICINAL PRODUCT ADMINISTRATION FORM DATA SUMMARY |        |      |                     |
|--------------------------------------------------------------------|--------|------|---------------------|
| PATIENT NUMBER: 666-01                                             | VISIT: | ROW: | VISIT DATE: No date |

| FIELD         | VALUE |
|---------------|-------|
| Row 35 Yes/No |       |
| Row 36 Yes/No |       |
| Row 37 Yes/No |       |
| Row 38 Yes/No |       |
| Row 39 Yes/No |       |
| Row 40 Yes/No |       |
| Row 1 Date    |       |
| Row 2 Date    |       |
| Row 3 Date    |       |
| Row 4 Date    |       |
| Row 5 Date    |       |
| Row 6 Date    |       |
| Row 7 Date    |       |
| Row 8 Date    |       |
| Row 9 Date    |       |
| Row 10 Date   |       |
| Row 11 Date   |       |
| Row 12 Date   |       |
| Row 13 Date   |       |
| Row 14 Date   |       |
| Row 15 Date   |       |
| Row 16 Date   |       |
| Row 17 Date   |       |
| Row 18 Date   |       |
| Row 19 Date   |       |
| Row 20 Date   |       |
| Row 21 Date   |       |
| Row 22 Date   |       |
| Row 23 Date   |       |
| Row 24 Date   |       |
| Row 25 Date   |       |
| Row 26 Date   |       |
| Row 27 Date   |       |
| Row 28 Date   |       |
| Row 29 Date   |       |
| Row 30 Date   |       |
| Row 31 Date   |       |
| Row 32 Date   |       |
| Row 33 Date   |       |
| Row 34 Date   |       |

| INVESTIGATIONAL MEDICINAL PRODUCT ADMINISTRATION FORM DATA SUMMARY |        |      |                     |
|--------------------------------------------------------------------|--------|------|---------------------|
| PATIENT NUMBER: 666-01                                             | VISIT: | ROW: | VISIT DATE: No date |

| FIELD       | VALUE |
|-------------|-------|
| Row 35 Date |       |
| Row 36 Date |       |
| Row 37 Date |       |
| Row 38 Date |       |
| Row 39 Date |       |
| Row 40 Date |       |
| Row 1 Vial  |       |
| Row 2 Vial  |       |
| Row 3 Vial  |       |
| Row 4 Vial  |       |
| Row 5 Vial  |       |
| Row 6 Vial  |       |
| Row 7 Vial  |       |
| Row 8 Vial  |       |
| Row 9 Vial  |       |
| Row 10 Vial |       |
| Row 11 Vial |       |
| Row 12 Vial |       |
| Row 13 Vial |       |
| Row 14 Vial |       |
| Row 15 Vial |       |
| Row 16 Vial |       |
| Row 17 Vial |       |
| Row 18 Vial |       |
| Row 19 Vial |       |
| Row 20 Vial |       |
| Row 21 Vial |       |
| Row 22 Vial |       |
| Row 23 Vial |       |
| Row 24 Vial |       |
| Row 25 Vial |       |
| Row 26 Vial |       |
| Row 27 Vial |       |
| Row 28 Vial |       |
| Row 29 Vial |       |
| Row 30 Vial |       |
| Row 31 Vial |       |
| Row 32 Vial |       |
| Row 33 Vial |       |
| Row 34 Vial |       |

| INVESTIGATIONAL MEDICINAL PRODUCT ADMINISTRATION FORM DATA SUMMARY |  |                     |            |
|--------------------------------------------------------------------|--|---------------------|------------|
| PATIENT NUMBER: 666-01                                             |  | VISIT:              | ROW:       |
|                                                                    |  | VISIT DATE: No date |            |
| FIELD                                                              |  | VALUE               |            |
| Row 35 Vial                                                        |  |                     |            |
| Row 36 Vial                                                        |  |                     |            |
| Row 37 Vial                                                        |  |                     |            |
| Row 38 Vial                                                        |  |                     |            |
| Row 39 Vial                                                        |  |                     |            |
| Row 40 Vial                                                        |  |                     |            |
| INSERTED ON: 2011-10-10 14:53:45                                   |  | BY: Demo Demo       | LOCKED: NO |
| PRINTED ON: 2011-10-10 15:36:44                                    |  | BY: Nadia Rubis     |            |



## CONCOMITANT TREATMENTS FORM DATA SUMMARY

USER: Nadia Rubis

CENTER: -

PATIENT NUMBER: 666-01

VISIT:

ROW: 1

VISIT DATE: No date

| FIELD                     | VALUE |
|---------------------------|-------|
| Medication                |       |
| First Intake Date         |       |
| Last Intake Date          |       |
| First Intake Date Unknown |       |
| Last Intake Date Unknown  |       |
| Last Intake Date Ongoing  |       |
| Dose                      |       |
| Schedule                  |       |
| Route                     |       |
| Disease/Symptom           |       |

INSERTED ON: 2011-10-10 14:53:54

BY: Demo Demo

LOCKED: NO

PRINTED ON: 2011-10-10 15:36:44

BY: Nadia Rubis

|                        |        |        |                     |
|------------------------|--------|--------|---------------------|
| PATIENT NUMBER: 666-01 | VISIT: | ROW: 2 | VISIT DATE: No date |
|------------------------|--------|--------|---------------------|

  

| FIELD                     | VALUE |
|---------------------------|-------|
| Medication                |       |
| First Intake Date         |       |
| Last Intake Date          |       |
| First Intake Date Unknown |       |
| Last Intake Date Unknown  |       |
| Last Intake Date Ongoing  |       |
| Dose                      |       |
| Schedule                  |       |
| Route                     |       |
| Disease/Symptom           |       |

  

|                                  |                 |            |
|----------------------------------|-----------------|------------|
| INSERTED ON: 2011-10-10 14:53:59 | BY: Demo Demo   | LOCKED: NO |
| PRINTED ON: 2011-10-10 15:36:44  | BY: Nadia Rubis |            |

|                        |        |        |                     |
|------------------------|--------|--------|---------------------|
| PATIENT NUMBER: 666-01 | VISIT: | ROW: 3 | VISIT DATE: No date |
|------------------------|--------|--------|---------------------|

  

| FIELD                     | VALUE |
|---------------------------|-------|
| Medication                |       |
| First Intake Date         |       |
| Last Intake Date          |       |
| First Intake Date Unknown |       |
| Last Intake Date Unknown  |       |
| Last Intake Date Ongoing  |       |
| Dose                      |       |
| Schedule                  |       |
| Route                     |       |
| Disease/Symptom           |       |

  

|                                  |                 |            |
|----------------------------------|-----------------|------------|
| INSERTED ON: 2011-10-10 14:54:02 | BY: Demo Demo   | LOCKED: NO |
| PRINTED ON: 2011-10-10 15:36:44  | BY: Nadia Rubis |            |

|                        |        |        |                     |
|------------------------|--------|--------|---------------------|
| PATIENT NUMBER: 666-01 | VISIT: | ROW: 4 | VISIT DATE: No date |
|------------------------|--------|--------|---------------------|

  

| FIELD                     | VALUE |
|---------------------------|-------|
| Medication                |       |
| First Intake Date         |       |
| Last Intake Date          |       |
| First Intake Date Unknown |       |
| Last Intake Date Unknown  |       |
| Last Intake Date Ongoing  |       |
| Dose                      |       |
| Schedule                  |       |
| Route                     |       |
| Disease/Symptom           |       |

  

|                                  |                 |            |
|----------------------------------|-----------------|------------|
| INSERTED ON: 2011-10-10 14:54:06 | BY: Demo Demo   | LOCKED: NO |
| PRINTED ON: 2011-10-10 15:36:44  | BY: Nadia Rubis |            |

|                                  |                 |        |                     |
|----------------------------------|-----------------|--------|---------------------|
| PATIENT NUMBER: 666-01           | VISIT:          | ROW: 5 | VISIT DATE: No date |
| FIELD                            |                 |        | VALUE               |
| Medication                       |                 |        |                     |
| First Intake Date                |                 |        |                     |
| Last Intake Date                 |                 |        |                     |
| First Intake Date Unknown        |                 |        |                     |
| Last Intake Date Unknown         |                 |        |                     |
| Last Intake Date Ongoing         |                 |        |                     |
| Dose                             |                 |        |                     |
| Schedule                         |                 |        |                     |
| Route                            |                 |        |                     |
| Disease/Symptom                  |                 |        |                     |
| INSERTED ON: 2011-10-10 14:54:09 | BY: Demo Demo   |        | LOCKED: NO          |
| PRINTED ON: 2011-10-10 15:36:44  | BY: Nadia Rubis |        |                     |



## ADVERSE EVENTS FORM DATA SUMMARY

USER: Nadia Rubis

CENTER: -

PATIENT NUMBER: 666-01

VISIT:

ROW: 1

VISIT DATE: No date

| FIELD                | VALUE |
|----------------------|-------|
| Event                |       |
| Onset Date           |       |
| Stopped Date         |       |
| Onset Date Unknown   | No    |
| Stopped Date Unknown | No    |
| Stopped Date Ongoing | No    |
| Intensity            |       |
| Pattern              |       |
| Action               |       |
| Outcome              |       |
| Relation             |       |
| SAE                  |       |

INSERTED ON: 2011-10-10 14:54:17

BY: Demo Demo

LOCKED: NO

PRINTED ON: 2011-10-10 15:36:44

BY: Nadia Rubis

|                        |        |        |                     |
|------------------------|--------|--------|---------------------|
| PATIENT NUMBER: 666-01 | VISIT: | ROW: 2 | VISIT DATE: No date |
|------------------------|--------|--------|---------------------|

| FIELD                | VALUE |
|----------------------|-------|
| Event                |       |
| Onset Date           |       |
| Stopped Date         |       |
| Onset Date Unknown   | No    |
| Stopped Date Unknown | No    |
| Stopped Date Ongoing | No    |
| Intensity            |       |
| Pattern              |       |
| Action               |       |
| Outcome              |       |
| Relation             |       |
| SAE                  |       |

|                                  |                 |            |
|----------------------------------|-----------------|------------|
| INSERTED ON: 2011-10-10 14:54:20 | BY: Demo Demo   | LOCKED: NO |
| PRINTED ON: 2011-10-10 15:36:44  | BY: Nadia Rubis |            |

|                        |        |        |                     |
|------------------------|--------|--------|---------------------|
| PATIENT NUMBER: 666-01 | VISIT: | ROW: 3 | VISIT DATE: No date |
|------------------------|--------|--------|---------------------|

  

| FIELD                | VALUE |
|----------------------|-------|
| Event                |       |
| Onset Date           |       |
| Stopped Date         |       |
| Onset Date Unknown   | No    |
| Stopped Date Unknown | No    |
| Stopped Date Ongoing | No    |
| Intensity            |       |
| Pattern              |       |
| Action               |       |
| Outcome              |       |
| Relation             |       |
| SAE                  |       |

  

|                                  |                 |            |
|----------------------------------|-----------------|------------|
| INSERTED ON: 2011-10-10 14:54:24 | BY: Demo Demo   | LOCKED: NO |
| PRINTED ON: 2011-10-10 15:36:44  | BY: Nadia Rubis |            |

|                        |        |        |                     |
|------------------------|--------|--------|---------------------|
| PATIENT NUMBER: 666-01 | VISIT: | ROW: 4 | VISIT DATE: No date |
|------------------------|--------|--------|---------------------|

| FIELD                | VALUE |
|----------------------|-------|
| Event                |       |
| Onset Date           |       |
| Stopped Date         |       |
| Onset Date Unknown   | No    |
| Stopped Date Unknown | No    |
| Stopped Date Ongoing | No    |
| Intensity            |       |
| Pattern              |       |
| Action               |       |
| Outcome              |       |
| Relation             |       |
| SAE                  |       |

|                                  |                 |            |
|----------------------------------|-----------------|------------|
| INSERTED ON: 2011-10-10 14:54:29 | BY: Demo Demo   | LOCKED: NO |
| PRINTED ON: 2011-10-10 15:36:44  | BY: Nadia Rubis |            |

|                        |        |        |                     |
|------------------------|--------|--------|---------------------|
| PATIENT NUMBER: 666-01 | VISIT: | ROW: 5 | VISIT DATE: No date |
|------------------------|--------|--------|---------------------|

  

| FIELD                | VALUE |
|----------------------|-------|
| Event                |       |
| Onset Date           |       |
| Stopped Date         |       |
| Onset Date Unknown   | No    |
| Stopped Date Unknown | No    |
| Stopped Date Ongoing | No    |
| Intensity            |       |
| Pattern              |       |
| Action               |       |
| Outcome              |       |
| Relation             |       |
| SAE                  |       |

  

|                                  |                 |            |
|----------------------------------|-----------------|------------|
| INSERTED ON: 2011-10-10 14:54:32 | BY: Demo Demo   | LOCKED: NO |
| PRINTED ON: 2011-10-10 15:36:44  | BY: Nadia Rubis |            |



# INVESTIGATIONAL MEDICINAL PRODUCT PERMANENTLY DISCONTINUATION FORM DATA SUMMARY

USER: Nadia Rubis

CENTER: -

PATIENT NUMBER: 666-01

VISIT:

ROW:

VISIT DATE: No date

| FIELD                                            | VALUE |
|--------------------------------------------------|-------|
| Did the patient discontinue the IMP prematurely? |       |
| Date of Last Intake                              |       |
| Main reason for discontinuation                  |       |
| Death Date                                       |       |
| Dialysis Date                                    |       |
| Other Reason Specify                             |       |
| Who did initiate the discontinuation?            |       |
| Other Specify                                    |       |

INSERTED ON: 2011-10-10 14:54:38

BY: Demo Demo

LOCKED: NO

PRINTED ON: 2011-10-10 15:36:44

BY: Nadia Rubis



# TRIAL END SUMMARY FORM DATA SUMMARY

USER: Nadia Rubis

CENTER: -

PATIENT NUMBER: 666-01

VISIT:

ROW:

VISIT DATE: No date

| FIELD                                               | VALUE |
|-----------------------------------------------------|-------|
| Did the patient complete study period per protocol? |       |
| Date of Discontinuation                             |       |
| Main reason for discontinuation                     |       |
| Death Date                                          |       |
| Dialysis Date                                       |       |
| Other Reason Specify                                |       |
| Who did initiate the discontinuation?               |       |
| Other Specify                                       |       |

INSERTED ON: 2011-10-10 14:54:44

BY: Demo Demo

LOCKED: NO

PRINTED ON: 2011-10-10 15:36:44

BY: Nadia Rubis

Copyright © 2011 Mario Negri Institute. Biomedical Technologies Lab. All Rights Reserved.

## **CLINICAL INVESTIGATION PROTOCOL**

**Final Version – 30<sup>th</sup> May 2013**

**- CONFIDENTIAL -**

**PATIENT – REPORTED INFORMATION  
ACCORDING TO THE  
TYPE OF INSTRUMENT – 02  
**PARITY – 02****

**Quality of life and social costs in patients with non diabetic chronic kidney disease**

### **PRINCIPAL INVESTIGATOR**

Dr Giuseppe Remuzzi, Scientific Coordinator

IRCCS - Mario Negri Institute for Pharmacological Research  
c/o Parco Scientifico Tecnologico Kilometro Rosso  
Via Stezzano, 87, Bergamo, 24126, ITALY

### **PROTOCOL WRITTEN BY**

Dr Matteo Conte , Dr Annalisa Perna

IRCCS - Mario Negri Institute for Pharmacological Research  
Clinical Research Center for Rare Diseases Aldo e Cele Daccò  
Villa Camozzi, Via Camozzi 3, Ranica, 24020, ITALY

|                                                  |
|--------------------------------------------------|
| ALL INFORMATION CONTAINED HEREIN IS CONFIDENTIAL |
|--------------------------------------------------|

**1. STUDY TITLE**

PATIENT – REPORTED INFORMATION ACCORDING TO THE TYPE OF INSTRUMENT – 02  
(PARITY – 02)

Quality of life and social costs in patients with non diabetic chronic kidney disease

**2. SYNOPSIS**

|                                      |                                                                                                                                                                                                                                                                                                                                                                                                                                                              |
|--------------------------------------|--------------------------------------------------------------------------------------------------------------------------------------------------------------------------------------------------------------------------------------------------------------------------------------------------------------------------------------------------------------------------------------------------------------------------------------------------------------|
| <b>TREATMENT</b>                     | Not applicable                                                                                                                                                                                                                                                                                                                                                                                                                                               |
| <b>TITLE</b>                         | <u>P</u> A <u>T</u> I <u>E</u> N <u>T</u> – <u>R</u> E <u>P</u> O <u>R</u> T <u>E</u> D <u>I</u> N <u>F</u> O <u>R</u> M <u>A</u> T <u>I</u> O <u>N</u> <u>A</u> C <u>C</u> O <u>R</u> D <u>I</u> N <u>G</u> <u>T</u> O <u>T</u> H <u>E</u> <u>T</u> <u>Y</u> <u>P</u> <u>E</u> <u>O</u> F <u>I</u> N <u>S</u> T <u>R</u> U <u>M</u> E <u>N</u> T – 02 (PARITY – 02) - Quality of life and social costs in patients with non diabetic chronic kidney disease |
| <b>OBJECTIVE</b>                     | To assess quality of life and societal costs in patients with non diabetic chronic kidney disease enrolled in the ongoing clinical trial: ALADIN 2 conducted at the Clinical Research Center <i>Aldo e Cele Daccò</i> , Mario IRCCS - Negri Institute, Ranica (BG), Italy                                                                                                                                                                                    |
| <b>CONDITION INTERVENTION</b>        | Self-administered questionnaire                                                                                                                                                                                                                                                                                                                                                                                                                              |
| <b>PRIMARY VARIABLE(S)</b>           | Quality of Life evaluation (QoL SF-36 V1™ Questionnaire)<br>Social and labour cost evaluation by Health and Labour Questionnaire (SF-HLQ)                                                                                                                                                                                                                                                                                                                    |
| <b>SECONDARY VARIABLE(S)</b>         | Serious and Non Serious Adverse events.                                                                                                                                                                                                                                                                                                                                                                                                                      |
| <b>STUDY TYPE</b>                    | Phase A: observational, cross-sectional study<br>Phase B: observational, prospective cohort study                                                                                                                                                                                                                                                                                                                                                            |
| <b>NUMBER OF CENTERS</b>             | 1<br>The study will be coordinated and monitored by the Clinical Research Center for Rare Diseases Aldo and Cele Daccò of the IRCCS - Mario Negri Institute for Pharmacological Research, Ranica, Bergamo. It will be conducted at Department of Renal Medicine of the Clinical Research Center Aldo and Cele Daccò and at Nephrology Units.                                                                                                                 |
| <b>NUMBER OF PATIENTS TO RECRUIT</b> | At least 80 patients randomized in the clinical trial ALADIN 2 carried out at the Clinical Research Center <i>Aldo e Cele Daccò</i> , Mario Negri Institute, Ranica (BG), Italy                                                                                                                                                                                                                                                                              |
| <b>ENROLMENT PERIOD</b>              | June 2013 – December 2014                                                                                                                                                                                                                                                                                                                                                                                                                                    |
| <b>FOLLOW UP TERM</b>                | Yearly for QoL SF-36 V1™ (for the Phase B, prospective cohort study only)                                                                                                                                                                                                                                                                                                                                                                                    |
| <b>END OF FOLLOW UP TERM</b>         | Closure of ALADIN 2 trial (for the Phase B, prospective cohort study only)                                                                                                                                                                                                                                                                                                                                                                                   |

### **3. ETHICS**

This study will be conducted in accordance with the ethical principles that have their origin in the Declaration of Helsinki and that are consistent with Good Clinical Practice and the applicable laws and regulations.

#### **3.1 Independent ethics committee**

This protocol will be submitted for approval to the local ethics committee. This investigation will be implemented in full accordance to the local laws for the protection of patients in biomedical studies and of patient data.

#### **3.2 Data protection**

All acting parties declare to keep the patient's data confidential. The patient will be informed about his/her right to consent or to deny the transmission of any study-related concerning his/her state of health, quality of life parameters and health and labour parameters, to his/her treating physician by the investigator before, during and after close-out of this study.

#### **3.3 Patient information and consent**

The patient will receive two separate documents: the Patient Information Letter and the Patient Consent Form. The documents will provide a summary of the quality of life (QoL) and socio-economical investigation, including its purpose in easily understandable local language. The investigator will be available to answer any question giving the patient sufficient reflection time. If the patient decides to take part in the investigation, he will date and sign the consent form and receive a copy of the document from the investigator. At any time included in the study will be able to withdraw their consent without any future liabilities.

### **4. DEFINITION OF RESPONSIBILITIES**

#### **4.1 Investigator's responsibilities**

Investigator's responsibilities related to ALADIN 2 trial are reported in the final protocol and subsequent amendments of each study. As far as the responsibilities referred to the administration of the two questionnaires are concerned, the clinical investigator will:

- a) be well acquainted with the investigation plan;
- b) endeavour to ensure an adequate recruitment of subjects;
- c) ensure that the subject has an adequate information to obtain informed consent;
- d) obtain and document informed consent;
- e) carry the primary responsibility for the accuracy, legibility and security of all documentation relevant to the investigation;
- f) ensure that the basic data are kept for the appropriate time (as required by national laws and regulation);
- g) be responsible for the supervision and assignment of duties to all responsible for the conduct and evaluation of the investigation in his/her department.

#### **4.2 Monitor's responsibilities**

The Clinical Monitor shall verify that Good Clinical Practice requirements are implemented. The study will be monitored by means of inspection of the following:

- a) patients enrolment in relation to observed inclusion criteria;
- b) signed and dated informed consent forms;
- c) adherence to the study protocol and respect of privacy for the patient;
- d) withdrawal of a patient and documentation of non conformity;
- e) all clinical trial requirements and documentation to which this study is linked (ALADIN 2 clinical trial).

## **5. BACKGROUND**

Autosomal Dominant Polycystic Kidney Disease (ADPKD), the most common hereditary cystic renal disease, has an incidence of 1 in 800 live births and account for 7-10% of patients on dialysis in developed countries (1). ADPKD shows genetic heterogeneity, with two main genes implicated, the PKD gene 1 (85%-90% of the cases) and the PKD gene 2 (10-15% of the cases) which encode for proteins polycystin 1 and polycystin 2 respectively (1,2). Clinically, ADPKD is characterized by renal and extra renal manifestations (1). In the kidneys, multiple cysts grow from distal and collecting tubular epithelial cells producing progressive renal enlargement with relatively initial stable renal functions (3). Thereafter, both tubular and secondary interstitial damage lead to faster renal loss and end-stage renal disease (ESRD) in approximately half of all patients affected in their fifth or sixth decade of life (2,4). More than 50% of the patients display hepatic cysts derived from cholangiocyte proliferation and fluid secretion (5). Pancreatic and intestinal cysts as well as increased risk of aortic aneurysms, heart-valve defects and sudden death due to rupture of intracerebral aneurysms are extra-renal manifestations, too (6). The precise molecular pathogenic mechanisms of ADPKD are not completely understood, but experimental models in renal tubular cells suggest that defect in polycystin 1 or polycystin 2 carry out to decrease intracellular calcium and increase cAMP levels changing the cell toward a proliferative and secretor phenotype (7,8,9). Cysts growth and enlargement are mainly consequence of epithelial cells proliferation and fluid chloride secretion through apical channels dependent of cAMP (10,11). Likewise, for hepatic cyst development, the proposed mechanisms are linked to abnormalities in epithelial cell proliferation and secretion in response to high intracellular cAMP concentrations secondary to polycystin defects (12). Patients with ADPKD, at similar levels of proteinuria and blood pressure control, do not seem to benefit to the same extent of ACE inhibitor therapy and have faster decline in glomerular filtration rate (GFR) compared with other chronic kidney diseases (13). Thus, in ADPKD renoprotective interventions - in addition to achieving maximal reduction of arterial blood pressure and proteinuria, and limiting the effects of other potential disease progression promoters (such as dyslipidemia, chronic hyperglycemia, or smoking) (14,15) - should also be specifically aimed to correct the dysregulation of epithelial cell growth, fluid secretion, and extracellular matrix deposition that is characteristic of this disease. Up to now, no specific therapies for ADPKD are available, but drugs like somatostatin, rapamycin, and tolvaptan targeting to growth and chloride secretions pathways are now being testing worldwide in some clinical trials (16,17). Somatostatin is an endogenous cycled polypeptide presents in two active forms (14 and 18 amino acids) with endocrine, paracrine and autocrine actions (18). The effects of somatostatin are pleiotropic depending on the tissue and the type of receptors it binds to. Five subtypes of somatostatin receptors have been described (sst1-sst5), but on the renal tubular epithelial cells, sst1 and sst2 receptors predominate. Of interest, it has been reported that somatostatin inhibits the increase in intracellular cAMP and chloride secretion induced by arginine-vasopressin hormone (AVH) in rectal glands of sharks

(19,20). Octreotide, a synthetic analog of somatostatin with longer half-life and higher sst2 affinity than naive polypeptides (21), has been used with negligible side effects for long-term treatment of acromegaly (22) and some malignant tumors (23). Considering the inhibitory effect of somatostatin on cell proliferation and chloride secretion, we have performed some years ago a pilot prospective cross-over controlled study with long-acting somatostatin analog in patients with ADPKD and different degree of renal dysfunction (17). We found that in these patients, 6 month treatment with octreotide was safe, well tolerated, and slowed the time-dependent increase in total kidney volume to a significant extent compared to placebo. The net effect in kidney volume resulted from an action of the drug on cyst volume and on parenchyma volume (17). Moreover, more recent post-hoc analysis of the concomitant liver disease progression in the same ADPKD patients demonstrated a significant reduction in the total liver volume during octreotide treatment, not appreciably observed during placebo. The beneficial effect of octreotide has been then confirmed in rodent models of polycystic liver and kidney disease where the drug significantly reduced liver weight, cyst volume, hepatic fibrosis and mitotic indexes by reducing the cholangiocyte and serum cAMP levels (24). Moreover, in the untreated ADPKD patients enrolled in our study, computed tomography evaluation of disease progression showed that the ratio of faintly contrast-enhanced parenchyma volume – referred as intermediate parenchyma – over total parenchyma volume strongly correlated with basal GFR and GFR changes during the observation period (25). The good safety profile of octreotide and the slowing of renal growth demonstrated in our short-term clinical study did suggest the feasibility of a randomized trial in larger series of ADPKD patients with normal renal function or mild renal insufficiency to verify whether long-term somatostatin treatment may eventually provide effective renoprotection. This trial - the ALADIN study - is ongoing and the planned ADPKD patients have been enrolled. So far, no particular side effects have been reported. More important, preliminary interim analysis of data from patients who reached 1 year treatment, confirmed the beneficial effect of octreotide in slowing the growth of total kidney volume compared to placebo. There is urgent need for renoprotection in ADPKD patients, particularly for those with more advanced renal dysfunction, for whom so far no clinical trials have been designed. The findings of the safety and potential benefit of octreotide in few patients with severe renal insufficiency observed in our initial pilot study (17) and the encouraging preliminary long-term effect results of octreotide on kidney growth, make worth investigating the efficacy of a long-acting somatostatin (Octreotide LAR) in slowing or even halting the kidney enlargement and renal function decline in ADPKD patients with moderate/severe renal failure.

## **6. AIMS OF THE ALADIN 2 STUDY**

### ***Primary***

The primary objective of this study in the short-term (1-year) is to compare the effect of long acting somatostatin analogue (Octreotide LAR) versus placebo on total kidney volume (TKV) change (delta TKV) as assessed by spiral computed tomography (spiral CT) scan. (see paragraph 6.1.1). While in the Long-term (3-years) the objective will be to compare the effect of long-acting somatostatin analogue (Octreotide LAR) vs. placebo on the rate of GFR decline as assessed by serial measurements of the iothexol plasma clearance.

## **Secondary**

The secondary objectives of this study is to compare, among the two groups, absolute and relative changes in renal and liver volume parameters (at month 0, 12 and 36) as well as in functional and biochemical parameters by quarterly clinical visits during the 36 month follow-up and To assess the safety profile of the somatostatin analogue.

### **6.1 Description of ALADIN 2 study**

ALADIN 2 is a randomized clinical trial coordinated by the IRCCS - Mario Negri Institute for Pharmacological Research at the Clinical Research Center for Rare Diseases, Ranica (Bergamo, Italy). Since October 2011 the above mentioned study has been recruiting patients with non diabetic chronic kidney disease.

## **7. PARITY 2 - STUDY DESIGN AND PATIENTS**

### **7.1 Enrolment plan**

The Phase A of the study has an observational, cross-sectional design. Patients are identified among the subjects referring to the Clinical Research Center for Rare Diseases *Aldo e Cele Daccò* of the IRCCS - Mario Negri Institute for Pharmacological Research fulfilling the inclusion/exclusion criteria. They will be asked to fill in the QoL Questionnaire (QoL SF-36 V1<sup>TM</sup>)<sup>7</sup> and the Health and Labour Questionnaire (SF-HLQ)<sup>9</sup>. Data will be collected in an ad-hoc form and in parallel clinical and demographic data on the above subjects will be collected in the trial Case Report Form (CRF) of the ALADIN 2 study. At least 80 all consecutive patients will be selected after randomization.

The Phase B of the study has an observational, prospective cohort design. Patients will be asked to fill in the questionnaires yearly (SF-36 V1<sup>TM</sup>, only) and at the final study visit (both, SF-36 V1<sup>TM</sup> and SF-HLQ). Data will be collected in an ad-hoc form and in parallel clinical and demographic data of the above subjects will be collected on the trial linked CRF of the ALADIN 2 study.

Eligible patients can be identified among the subjects attending the Day Hospital of the Clinical Research Center for Rare Diseases *Aldo e Cele Daccò* of the IRCCS - Mario Negri Institute, who are enrolled in the above mentioned ongoing clinical trial in patients with non diabetic chronic kidney disease.

### **7.2 Study population**

#### **7.2.1 Number of patients**

Due to the exploratory nature of the study a formal sample size assessment is not foreseen. However at least 80 patients with non diabetic chronic kidney disease will be adequate to provide a reliable measure of the eight QoL domains (1. physical functioning, 2. role-physical, 3. bodily pain, 4. general health, 5. vitality, 6. social functioning, 7. role-emotional, 8. mental health). The above sample size has been considered adequate also to provide a reliable measure of the societal and labour costs in the above kind of participants. A difference of 5 points or more is considered as clinically significant.

#### **7.2.2 Inclusion criteria**

The following inclusion criteria will be considered:

a) patients with non diabetic chronic kidney disease;

- b) enrolled in ALADIN 2 clinical trial at the Clinical Research Center for Rare Diseases *Aldo e Cele Daccò* of the IRCCS - Mario Negri Institute for Pharmacological Research;
- c) legal capacity to give informed consent;
- d) written informed consent;
- e) inability to compile the questionnaires for different reasons from those listed in the exclusion criteria (e.g. blindness). In this case the subject will be assisted by accompanying person.
- f) Age > 18 years
- g) Clinical and ultrasound diagnosis of ADPKD
- h) Estimated GFR between 15 and 40 ml/min/1.73m<sup>2</sup> (by the MDRD 4 variable equation)

### 7.2.3 Exclusion criteria

The following exclusion criteria will be considered:

- a) patients with diabetic chronic kidney disease;
- b) legal incapacity and/or the circumstances rendering the patient unable to understand the nature and the scope of the study.
- c) 24-h Urinary protein excretion rate >3g (suggestive of a concomitant glomerular disease that could benefit of specific therapy)
- d) Symptomatic urinary tract lithiasis or obstruction
- e) Uncontrolled diabetes mellitus (HbA1c >8%) or hypertension (systolic/diastolic BP >180/110 mmHg)
- f) Current urinary tract infection
- g) Symptomatic biliary tract lithiasis
- h) Active cancer
- i) Psychiatric disorders or any condition that might prevent full comprehension of the purposes and risks of the study
- l) Pregnancy, lactation or child bearing potential and ineffective contraception (estrogen therapy in post menopausal women should not be stopped)

### 7.3 Setting

Day Hospital of the Clinical Research Center for Rare Diseases *Aldo e Cele Daccò* of the IRCCS - Mario Negri Institute for Pharmacological Research.

### 7.4 Study Type

The Phase A of the study is an observational cross-sectional study. The phase B has an observational, prospective cohort design.

Patient satisfying the inclusion/exclusion criteria will be provided with two questionnaires. Patient will be asked to fill in the informed consent and then the questionnaires. They will be assisted, if required, by an accompanying persons. Questionnaires will be rendered anonymous for data processing.

The recruitment is expected to start in June 2013 and to end December 2014 for Phase A. Yearly, for phase B patients will be asked to fill in the questionnaire SF-36 V1<sup>TM</sup> in order to evaluate changes in QoL; at clinical study closure, patients will be asked to fill in both questionnaires SF-36 V1<sup>TM</sup> and SF-HLQ to assess changes in QoL and societal costs. In parallel to data-gathering by two previously mentioned questionnaires, demographic and clinical data will be collected in the CRF of the linked clinical trial.

### 7.5 Quality of life and societal cost evaluation

The primary aim of this study is to assess the QoL and the societal costs as described in the following.

### **7.5.1 Quality of life**

The QoL (including physical functioning, role-physical, bodily pain, general health, vitality, social functioning, role-emotional and mental health) of all patients will be evaluated using the Version 1 of SF-36 (QoL SF-36 V1™ Questionnaire) adjusted and validated in Italy<sup>7</sup> (see Enclosure A). For the Phase B of the study quantity and quality of life can be quantified by the quality-adjusted life year (QALY)<sup>15,16</sup> indicator to be used to assess the impact of healthcare intervention on an individual patient.

### **7.5.2 Social costs**

Social costs include production losses due to the absence from work, reduced productivity, and reduced unpaid labour participation. Production losses of paid and unpaid labour will be assessed by means of the Short-Form-Health and Labour Questionnaire (SF-HLQ), of which existing translations are available for Italy<sup>11</sup> (see Enclosure B). The SF-HLQ Questionnaire allows to estimate indirect non-medical costs of productivity losses caused by absence from work due to health problems. Indirect costs are used in pharmacoeconomic research to perform an economic evaluation from societal perspective<sup>9</sup>.

### **7.5.3 Currency**

Euro will be considered as currency for the evaluation of social costs.

## **7.6 Sample size and statistical analysis**

### **7.6.1 Sample size**

See paragraph 7.2.1

### **7.6.2 Statistical analysis**

As distributions of QoL scores are skewed<sup>11</sup>, the nonparametric Wilcoxon rank sum test will be applied. Scores will be expressed as a median and interquartile range. To compare the costs by clinical category, a multiple linear regression model will be used. Explorative analyses in pre-defined subgroups of patients (e.g. by gender) will be performed. Study results will be reported according to suggested guidelines<sup>17</sup>. A *P value* less than 0.05 (two tailed) will be considered to indicate statistical significance. All analyses will be carried out using SAS 9.1 (SAS Institute Inc., Cary, NC) and Stata 12 (StataCorp LP, College Station, Texas).

## **8. DATA COLLECTION**

The scores of QoL Questionnaire SF36 V1™ and indirect costs (missed days work, etc.) will be quantified by means of the Health and Labour Questionnaire and recorded on a paper data form and coded on a Excel file (Microsoft Office Excel 2003).

## **9. STUDY START**

Expected Phase A and Phase B study are foreseen to start in March 2013.

## **10. STUDY COMPLETION**

The study will be completed depending on study closure of ALADIN 2 trial.

## 11. ACKNOWLEDGEMENTS

The authors are grateful to Professor Leona van Roijen (Erasmus University Rotterdam, The Netherlands), Professor Maarten J. Postma (University of Groningen, The Netherlands) and colleagues for permission to use the SF-HLQ instrument.

## 12. REFERENCES (FROM ALADIN 2'S PROTOCOL)

1. P Wilson. Mechanisms of disease: Polycystic Kidney Disease. *N Engl J Med* 2004; 350:151-64.
2. M Simons, G Walz. Polycystic kidney disease: Cell division without a clue?. *Kidney Int* 2006; 70:854–864.
3. Grantham JJ, Chapman AB, Torres VE. Volume progression in autosomal dominant polycystic kidney disease: the major factor determining clinical outcomes. *Clin J Am Soc Nephrol* 2006; 1:148-157.
4. E Meijer, P Jong, D Peters, R Gansevoort. Better understanding of ADPKD results in potential new treatment options: ready for the cure. *J Nephrol* 2008; 21: 133-138.
5. Alvaro D, Onori P, Alpini G, Franchitto A, Jefferson D, Torrice A et al. Morphological and functional features of hepatic cyst epithelium in autosomal dominant polycystic kidney disease. *Am J Pathol*. 2008 Feb;172(2):321-32.
6. UI Haque, Moatasim A. Adult polycystic kidney disease: a disorder of connective tissue? *Int J Clin Exp Pathol* 2008; 1(1):84-90.
7. E Meijer, P Jong, D Peters, R Gansevoort. Better understanding of ADPKD results in potential new treatment options: ready for the cure. *J Nephrol* 2008; 21: 133-138.
8. T Yamaguchi, D Wallace, B Magenheimer, S Hempson, J Grantham, J Calvet. Calcium restriction allows cAMP activation of the B-Raf/ERK pathway, switching cells to a cAMP-dependent growth-stimulated phenotype. *J Biol Chem* 2004; 279: 40419–40430.
9. T Yamaguchi, S Hempson, G Reif, A Hedge, D Wallace. Calcium restores a normal proliferation phenotype in human polycystic kidney disease epithelial cells. *J Am Soc Nephrol* 2006; 17: 178–187.
10. M Alqaumi, S Srivastava, Z Li, O Zhdnova, H Wulff. KCa3.1 potassium channels are critical for cAMP-dependent chloride secretion and cyst growth in ADPKD. *Kidney Int* (advance online publication, June 11, 2008).
11. B Yang, N Sonawane, D Zhao, S Somlo, A Verkman. Small-molecule CFTR inhibitors slow cyst growth in polycystic kidney disease. *J Am Soc Nephrol* 2008; 19: 1300–1310.
12. Francis H, Glaser S, Ueno Y, Lesage G, Marucci L, Benedetti A et al. cAMP stimulates the secretory and proliferative capacity of the rat intrahepatic biliary epithelium through changes in the PKA/Src/MEK/ERK1/2 pathway. *J Hepatol*. 2004 Oct;41(4):528-37.
13. Van Dijk MA, Breuning MH, Duizer R, van Es LA, Westendorp RG. No effect of enalapril on progression in autosomal dominant polycystic kidney disease. *Nephrol Dial Transplant* 2003; 18:2314-2320.
14. Eder T et al: Effect of antihypertensive therapy on renal function and urinary albumin excretion in hypertensive patients with autosomal dominant polycystic kidney disease. *Am J Kidney Dis* 2000; 35: 427-432.
15. Torres VE. Hypertension, proteinuria, and progression of autosomal dominant polycystic kidney disease. *Am J Kidney Dis* 2000; 35: 547-550.
16. A. Chapman. Autosomal Dominant Polycystic Kidney Disease: Time for a Change? *J Am Soc Nephrol* 2007; 18: 1399-1407.
17. Ruggenti P, Remuzzi A, Ondei P, Fasolini G, Antiga L, Ene-Iordache B, Remuzzi G, Epstein F. Safety and efficacy of long-acting somatostatin treatment on autosomal dominant polycystic kidney disease. *Kidney Int* 2005; 68: 206–216.
18. M. Pawlikowski, G. Melen-Mucha. Perspective of new potential therapeutic applications of somatostatin analogs. *Neuroendocrinology Letters* 2003; 24: 21-27.

19. P Silva et al: Mode of action of somatostatin to inhibit secretion by shark rectal gland. *Am J Physiol* 1985 249:R329–R334.
20. P Silva et al: Somatostatin inhibits CNP-induced stimulation of shark rectal gland. *Bull Mt Desert Island Biol Lab* 1991; 40: 25–29.
21. G Tulipano and S Schulz. Novel insights in somatostatin receptor physiology. *Eur J Endocrinol* 2007; 156: S3–S11.
22. J Ayuk, SE Stewart, PM Stewart, MC Sheppard. Long-term safety and efficacy of depot long-acting somatostatin analogs for the treatment of acromegaly. *J Clin Endocrinol Metab* 2002; 87: 4142– 4146.
23. C Susini, L Buscail. Rationale for the use of somatostatin analogs as antitumor agents. *Ann Oncol* 2006; 17: 1733–1742.
24. Masyuk T, Masyuk A, Torres V, Harris P, Larusso N. Octreotide inhibits hepatic cystogenesis in a rodent model of polycystic liver disease by reducing cholangiocyte adenosine 3',5'- cyclic monophosphate. *Gastroenterology* 2006; 123: 1104-1116.
25. Antiga L, Piccinelli M, Fasolini G, Ene-Iordache B, Ondei P, Bruno S, Remuzzi G, Remuzzi G. Computed tomography evaluation of ADPKD progression: a progress report. *Clin J Am Soc Nephrol* 2006; 1: 754-760.
26. Feelders R, Hofland L, van Aken M, Neggers S, Lamberts S, de Herder W and van der Lely AJ. *Drugs* 2009, 69 (16):2207-26.
27. Caroli A, Antiga L, Cafaro M, Fasolini G, Remuzzi A, Remuzzi G and Ruggenenti P. *Clin J Am Soc Nephrol*. 2010, 5:783-9.
28. O'Brien P, Fleming J. A multiple testing procedure for clinical trials. *Biometrics* 1979; 35:549-556.

**13. ENCLOSURE A****ALADIN 2 STUDY SYNOPSIS**

|                                      |                                                                                                                                                                                                                                                                                                                                                                                                                                                                                                                                                                                                                                             |
|--------------------------------------|---------------------------------------------------------------------------------------------------------------------------------------------------------------------------------------------------------------------------------------------------------------------------------------------------------------------------------------------------------------------------------------------------------------------------------------------------------------------------------------------------------------------------------------------------------------------------------------------------------------------------------------------|
| <b>TREATMENT</b>                     |                                                                                                                                                                                                                                                                                                                                                                                                                                                                                                                                                                                                                                             |
| <b>TITLE</b>                         | A Prospective, Randomized, Double-Blind, Placebo Controlled Clinical Trial To Assess The Effects Of Long-Acting Somatostatin (Octreotide Lar) Therapy On Disease Progression In Patients With Autosomal Dominant Polycystic Kidney Disease And Moderate To Severe Renal Insufficiency (Aladin 2 Study)                                                                                                                                                                                                                                                                                                                                      |
| <b>OBJECTIVE</b>                     | The general aim of the trial is to assess the efficacy of one year treatment with long-acting somatostatin analogue (Octreotide LAR) compared with placebo in slowing kidney and liver growth rate in patients with ADPKD and moderate/severe renal insufficiency (estimated GFR by MDRD 4 variables: 15-40 ml/min/1.73m <sup>2</sup> ) and to assess whether and to which extent this translates into slower renal function decline over 3-year follow-up.                                                                                                                                                                                 |
| <b>CONDITION INTERVENTION</b>        | After four weeks wash-out period from previous ACE inhibitors and All receptor antagonist, eligible patients will be randomized to two treatment arms:<br>1. Telmisartan (one week 40 mg daily, followed by fifteen weeks treatment period with 80 mg daily);<br>2. Losartan (one week 50 mg daily, followed by fifteen weeks treatment period with 100 mg daily);<br>At the end of the first treatment period with telmisartan or losartan, each patient will crossover to the other treatment.<br>After the second treatment period, there will be a four week recovery period.                                                           |
| <b>PRIMARY VARIABLE(S)</b>           | <i>Primary</i><br>Short-term (1-year)<br>To compare the effect of long acting somatostatin analogue (Octreotide LAR) versus placebo on total kidney volume (TKV) change (delta TKV) as assessed by spiral computed tomography (spiral CT) scan.<br>Long-term (3-years)<br>To compare the effect of long-acting somatostatin analogue (Octreotide LAR) vs. placebo on the rate of GFR decline as assessed by serial measurements of the iohexol plasma clearance.                                                                                                                                                                            |
| <b>SECONDARY VARIABLE(S)</b>         | <i>Secondary</i><br>To compare, among the two groups, absolute and relative changes in renal and liver volume parameters (at month 0, 12 and 36) as well as in functional and biochemical parameters by quarterly clinical visits during the 36 month follow-up.                                                                                                                                                                                                                                                                                                                                                                            |
| <b>STUDY TYPE</b>                    | A prospective, randomized, open label blinded end point (PROBE).                                                                                                                                                                                                                                                                                                                                                                                                                                                                                                                                                                            |
| <b>NUMBER OF PATIENTS TO RECRUIT</b> | Due to the exploratory nature of the study a formal sample size assessment is not foreseen. However at least 80 patients with non diabetic chronic kidney disease will be adequate to provide a reliable measure of the eight QoL domains (1. physical functioning, 2. role-physical, 3. bodily pain, 4. general health, 5. vitality, 6. social functioning, 7. role-emotional, 8. mental health). The above sample size has been considered adequate also to provide a reliable measure of the societal and labour costs in non diabetic chronic kidney disease. A difference of 5 points or more is considered as clinically significant. |
| <b>STUDY PERIOD</b>                  | 32 weeks                                                                                                                                                                                                                                                                                                                                                                                                                                                                                                                                                                                                                                    |

14. ENCLOSURE B

QUESTIONARIO SULLO STATO DI SALUTE SF-36

Data consegna I\_I\_I\_I\_I\_I\_I\_I

N° codice paziente I\_I\_I\_I\_I\_I

**ISTRUZIONI:** Questo questionario intende valutare cosa Lei pensa della Sua salute. Le informazioni raccolte permetteranno di essere sempre aggiornati su come si sente e su come riesce a svolgere le Sue attività consuete.  
Risponda a ciascuna domanda del questionario indicando la Sua risposta come mostrato di volta in volta. Se non si sente certo della risposta, effettui la scelta che comunque Le sembra migliore.

1. In generale, direbbe che la Sua salute è:

(Indichi un numero)

- Eccellente .....1
- Molto buona.....2
- Buona.....3
- Passabile .....4
- Scadente .....5

2. Rispetto ad un anno fa, come giudicherebbe, ora, la Sua salute in generale?

(Indichi un numero)

- Decisamente migliore adesso rispetto ad un anno fa .....1
- Un po' migliore adesso rispetto ad un anno fa .....2
- Più o meno uguale rispetto ad un anno fa.....3
- Un po' peggiore adesso rispetto ad un anno fa .....4
- Decisamente peggiore adesso rispetto ad un anno fa .....5

Copyright © New England Medical Center Hospitals, Inc., 1992  
All rights reserved.  
(IQOLA SF-36 Italian version 1.6)

3. Le seguenti domande riguardano alcune attività che potrebbe svolgere nel corso di una qualsiasi giornata. La Sua salute La limita attualmente nello svolgimento di queste attività?

(Indichi per ogni domanda il numero 1, 2, o 3)

|                                                                                                                                              | <b>SI,<br/>mi limita<br/>parecchio</b> | <b>SI,<br/>mi limita<br/>parzialmente</b> | <b>NO,<br/>non mi limita<br/>per nulla</b> |
|----------------------------------------------------------------------------------------------------------------------------------------------|----------------------------------------|-------------------------------------------|--------------------------------------------|
| a. <b>Attività fisicamente impegnative</b> , come correre, sollevare oggetti pesanti, praticare sport faticosi                               | 1                                      | 2                                         | 3                                          |
| b. <b>Attività di moderato impegno fisico</b> , come spostare un tavolo, usare l'aspirapolvere, giocare a bocce o fare un giro in bicicletta | 1                                      | 2                                         | 3                                          |
| c. Sollevare o portare le borse della spesa                                                                                                  | 1                                      | 2                                         | 3                                          |
| d. Salire <b>qualche</b> piano di scale                                                                                                      | 1                                      | 2                                         | 3                                          |
| e. Salire <b>un</b> piano di scale                                                                                                           | 1                                      | 2                                         | 3                                          |
| f. Piegarsi, inginocchiarsi o chinarsi                                                                                                       | 1                                      | 2                                         | 3                                          |
| g. Camminare <b>per un chilometro</b>                                                                                                        | 1                                      | 2                                         | 3                                          |
| h. Camminare <b>per qualche centinaia di metri</b>                                                                                           | 1                                      | 2                                         | 3                                          |
| i. Camminare <b>per circa cento metri</b>                                                                                                    | 1                                      | 2                                         | 3                                          |
| l. Fare il bagno o vestirsi da soli                                                                                                          | 1                                      | 2                                         | 3                                          |

4. Nelle ultime 4 settimane, ha riscontrato i seguenti problemi sul lavoro o nelle altre attività quotidiane, a causa della Sua salute fisica?

Risponda SI o NO a ciascuna domanda

(Indichi per ogni domanda il numero 1 o 2)

|                                                                                                          | <b>SI</b> | <b>NO</b> |
|----------------------------------------------------------------------------------------------------------|-----------|-----------|
| a. Ha ridotto <b>il tempo</b> dedicato al lavoro o ad altre attività                                     | 1         | 2         |
| b. Ha <b>reso</b> meno di quanto avrebbe voluto                                                          | 1         | 2         |
| c. Ha dovuto limitare alcuni <b>tipi</b> di lavoro o di altre attività                                   | 1         | 2         |
| d. Ha avuto <b>difficoltà</b> nell'eseguire il lavoro o altre attività (ad esempio, ha fatto più fatica) | 1         | 2         |

Copyright © New England Medical Center Hospitals, Inc., 1992  
All rights reserved.  
(IQOLA SF-36 Italian version 1.6)

5. Nelle ultime 4 settimane, ha riscontrato i seguenti problemi sul lavoro o nelle altre attività, a causa del Suo stato emotivo (quale il sentirsi depresso o ansioso)?

Risponda SI o NO a ciascuna domanda

(Indichi per ogni domanda il numero 1 o 2)

|                                                                             | SI | NO |
|-----------------------------------------------------------------------------|----|----|
| a. Ha ridotto <b>il tempo</b> dedicato al lavoro o ad altre attività        | 1  | 2  |
| b. Ha <b>reso</b> meno di quanto avrebbe voluto                             | 1  | 2  |
| c. Ha avuto un calo di <b>concentrazione</b> sul lavoro o in altre attività | 1  | 2  |

6. Nelle ultime 4 settimane, in che misura la Sua salute fisica o il Suoi stato emotivo hanno interferito con le normali attività sociali con la famiglia, gli amici, i vicini di casa, i gruppi di cui fa parte?

(Indichi un numero)

|                  |   |
|------------------|---|
| Per nulla.....   | 1 |
| Leggermente..... | 2 |
| Un po' .....     | 3 |
| Molto.....       | 4 |
| Moltissimo.....  | 5 |

7. Quanto dolore fisico ha provato nelle ultime 4 settimane?

(Indichi un numero)

|                     |   |
|---------------------|---|
| Nessuno .....       | 1 |
| Molto lieve.. ..... | 2 |
| Lieve .....         | 3 |
| Moderato .....      | 4 |
| Forte .....         | 5 |
| Molto forte .....   | 6 |

8. Nelle ultime 4 settimane, in che misura il dolore L'ha ostacolata nel lavoro che svolge abitualmente (sia in casa sia fuori casa)?

(Indichi un numero)

- Per nulla .....1
- Molto poco.....2
- Un po'.....3
- Molto.....4
- Moltissimo.....5

9. Le seguenti domande si riferiscono a come si è sentito nelle ultime 4 settimane. Risponda a ciascuna domanda scegliendo la risposta che più si avvicina al Suo caso. Per quanto tempo nelle ultime 4 settimane si è sentito...

(Indichi un numero per ogni domanda)

|                                                             | Sempre | Quasi sempre | Molto tempo | Una parte del tempo | Quasi mai | Mai |
|-------------------------------------------------------------|--------|--------------|-------------|---------------------|-----------|-----|
| a. vivace brillante?                                        | 1      | 2            | 3           | 4                   | 5         | 6   |
| b. molto agitato?                                           | 1      | 2            | 3           | 4                   | 5         | 6   |
| c. così giù di morale che niente avrebbe potuto tirarLa su? | 1      | 2            | 3           | 4                   | 5         | 6   |
| d. calmo e sereno?                                          | 1      | 2            | 3           | 4                   | 5         | 6   |
| e. pieno di energia?                                        | 1      | 2            | 3           | 4                   | 5         | 6   |
| f. scoraggiato e triste?                                    | 1      | 2            | 3           | 4                   | 5         | 6   |
| g. sfinito?                                                 | 1      | 2            | 3           | 4                   | 5         | 6   |
| h. felice?                                                  | 1      | 2            | 3           | 4                   | 5         | 6   |
| i. stanco?                                                  | 1      | 2            | 3           | 4                   | 5         | 6   |

10. Nelle ultime 4 settimane, per quanto tempo la Sua salute fisica o il Suo stato emotivo hanno interferito nelle Sue attività sociali, in famiglia, con gli amici?

(Indichi un numero)

- Sempre .....1
- Quasi sempre ..... 2
- Una parte del tempo.....3
- Quasi mai.....4
- Mai.....5

11. Scelga la risposta che meglio descrive quanto siano **VERE** o **FALSE** le seguenti affermazioni.

(Indichi un numero per ogni affermazione)

|                                                           | Certamente vero | In gran parte vero | Non so | In gran parte falso | Certamente falso |
|-----------------------------------------------------------|-----------------|--------------------|--------|---------------------|------------------|
| a. Mi pare di ammalarmi un po' più facilmente degli altri | 1               | 2                  | 3      | 4                   | 5                |
| b. La mia salute è come quella degli altri                | 1               | 2                  | 3      | 4                   | 5                |
| c. Mi aspetto che la mia salute andrà peggiorando         | 1               | 2                  | 3      | 4                   | 5                |
| d. Godo di ottima salute                                  | 1               | 2                  | 3      | 4                   | 5                |

**15. ENCLOSURE C****QUESTIONARIO SF-HLQ****SF-HLQ**

Le seguenti domande riguardano gli effetti dei problemi di salute sul lavoro retribuito e su quello non retribuito (ad esempio il lavoro domestico). Tutte le domande fanno riferimento alle **ultime due settimane**.

Con “problemi di salute” ci si riferisce tanto ai problemi fisici quanto a quelli emotivi.

1. Hai attualmente un lavoro retribuito?

☐ No, *(continua per favore con la domanda 9)*

☐ Sì;

a. Quante ore alla settimana lavori? ..... ore alla settimana.

b. Suddivide in quanti giorni? ..... giorni.

c. Che lavoro fai? .....

2. a. Nelle ultime due settimane, sei stato/a completamente incapace di svolgere il tuo lavoro retribuito, in seguito a problemi di salute?

☐ No

☐ Sì, non sono stato in grado di lavorare per ..... giorni.

b. Sei stato/a completamente incapace di svolgere il tuo lavoro retribuito, in seguito a problemi di salute, per un periodo **superiore** alle ultime due settimane?

☐ No

☐ Sì, sono malato/a da ..... *(continua per favore con la domanda 8)*

A volte i problemi di salute non consentono al lavoratore di presentarsi al lavoro. E' inoltre possibile che il lavoratore vada al lavoro ma, sempre a causa dei problemi di salute, non sia in grado

di svolgere le sue funzioni con la stessa abituale efficienza. Le domande che vanno dalla n. 3 alla n. 7 si riferiscono a questa seconda situazione.

3. Sei stato/a ostacolato/a da problemi di salute nelle ultime due settimane nello svolgere il tuo lavoro retribuito?

- ☐ No, in nessun modo (*vai alla domanda 8*)  
☐ Sì, mediamente  
☐ Sì, molto

4. Nelle ultime due settimane, quanti giorni sei andato/a al lavoro malgrado avessi problemi di salute?

..... giorni (*NOTA: **Non** considerare i giorni in cui hai riportato essere stato/a malato/a*)

5. Per cortesia, indica il livello di **efficienza** del tuo lavoro nei giorni in cui hai lavorato benché avessi problemi di salute.

(*1 indica che a mala pena sei stato/a in grado di lavorare, mentre 10 indica che il tuo lavoro non ne ha subito conseguenze*)

|                          |                          |                          |                          |                          |                          |                          |                          |                          |                          |
|--------------------------|--------------------------|--------------------------|--------------------------|--------------------------|--------------------------|--------------------------|--------------------------|--------------------------|--------------------------|
| 1                        | 2                        | 3                        | 4                        | 5                        | 6                        | 7                        | 8                        | 9                        | 10                       |
| <input type="checkbox"/> |

massima  
inefficienza

efficiente come  
al solito

6. Nella seguente domanda troverai una serie di dichiarazioni che possono riferirsi a persone con problemi di salute in relazione alla loro attuale situazione lavorativa. Per cortesia indica, per ogni dichiarazione che è menzionata, quanto spesso si può applicare a te, nelle ultime due settimane.

Sono andato/a al lavoro, ma come conseguenza di problemi di salute ....

|                                                           | quasi<br>mai             | qualche<br>volta         | spesso                   | quasi<br>sempre          |
|-----------------------------------------------------------|--------------------------|--------------------------|--------------------------|--------------------------|
| .. ho avuto problemi a concentrarmi                       | <input type="checkbox"/> | <input type="checkbox"/> | <input type="checkbox"/> | <input type="checkbox"/> |
| .. ho lavorato piu' lentamente                            | <input type="checkbox"/> | <input type="checkbox"/> | <input type="checkbox"/> | <input type="checkbox"/> |
| .. ho dovuto isolarmi dagli altri                         | <input type="checkbox"/> | <input type="checkbox"/> | <input type="checkbox"/> | <input type="checkbox"/> |
| .. ho avuto piu' difficolta' a prendere decisioni         | <input type="checkbox"/> | <input type="checkbox"/> | <input type="checkbox"/> | <input type="checkbox"/> |
| .. ho dovuto rinviare parte del mio lavoro                | <input type="checkbox"/> | <input type="checkbox"/> | <input type="checkbox"/> | <input type="checkbox"/> |
| .. altri hanno dovuto fare parte del mio lavoro           | <input type="checkbox"/> | <input type="checkbox"/> | <input type="checkbox"/> | <input type="checkbox"/> |
| .. ho avuto altri problemi, (per cortesia indicali) ..... |                          |                          |                          |                          |

7. Quante ore straordinarie dovrai fare per recuperare il lavoro che non sei stato/a in grado di completare nelle tue normali ore lavorative, in seguito a problemi di salute, nelle ultime due settimane?

..... ore (*NOTA: Non conteggiare i giorni in cui risulti in malattia.*)

8. Vorremmo sapere qual'e' il tuo stipendio netto (quello derivante dal tuo lavoro retribuito).  
(*NOTA: questa domanda riguarda le tue entrate, non includere quelle del tuo partner - se ne hai uno.*)

- ☐ € ..... alla settimana
- ☐ € ..... per 4 settimane
- ☐ € ..... al mese
- ☐ € ..... all'anno
- ☐ Non so a quanto ammonano le mie entrate, o preferisco non dirlo

Ora vai alla domanda 10

9. Non hai un lavoro retribuito. Quale delle seguenti situazioni si applica meglio a te stesso/a?

- ☐ Ho il compito quotidiano di svolgere i lavori domestici.
- ☐ Ricevo una pensione, o sono entrato/a in pensione anticipata.
- ☐ Sono ancora uno/a studente/essa.

- ☐ Non sono in grado di svolgere lavoro retribuito in seguito ai problemi di salute da ...../...../..... Se prima di questa data avevi un lavoro retribuito, quante ore alla settimana lavoravi? .....ore alla settimana.
- ☐ Non ho lavoro retribuito per altre ragioni (ad esempio disoccupazione volontaria, volontariato, ecc.)

10. Quanti soldi hai ricevuto, il mese scorso, dai programmi governativi di assistenza sociale/pensione/indennita' di invalidita'?

- ☐ € 0
- ☐ € 1 - € 200
- ☐ € 201 - € 500
- ☐ € 501 - € 1000
- ☐ > € 1001

11. Quanti soldi hai ricevuto da familiari o amici il mese scorso?

- ☐ € 0
- ☐ € 1 - € 200
- ☐ € 201 - € 500
- ☐ € 501 - € 1000
- ☐ > € 1001

12. Hai svolto le seguenti attivita' nelle ultime due settimane?

a. Lavori domestici (ad esempio, cucinare, pulire, fare il bucato)

- ☐ Svolti, non sono stato/a ostacolato/a dai problemi di salute
- ☐ Svolti, ma sono stato/a ostacolato/a da problemi di salute
- ☐ Non svolti, a causa dei problemi di salute
- ☐ Non svolti, per altre ragioni

b. Spese (ad esempio, spesa alimentare, altro shopping, andare in banca o all'ufficio postale)

- ☐ Fatte, non sono stato/a ostacolato/a dai problemi di salute
- ☐ Fatte, ma sono stato/a ostacolato/a da problemi di salute
- ☐ Non fatte, a causa dei problemi di salute
- ☐ Non fatte, per altre ragioni

c. Lavori occasionali e altri lavori domestici (ad esempio, riparazioni alla casa, giardinaggio, lavori di manutenzione della macchina)

- ☐ Svolti, non sono stato/a ostacolato/a dai problemi di salute
- ☐ Svolti, ma sono stato/a ostacolato/a da problemi di salute
- ☐ Non svolti, a causa dei problemi di salute
- ☐ Non svolti, per altre ragioni

d. Fatto cose per o con i tuoi figli (ad esempio, prendersi cura di loro, giocare, portarli a scuola, aiutarli nei compiti)

- ☐ Svolte, non sono stato/a ostacolato/a dai problemi di salute
- ☐ Svolte, ma sono stato/a ostacolato/a da problemi di salute
- ☐ Non svolte, a causa dei problemi di salute
- ☐ Non svolte, per altre ragioni
- ☐ Non applicabile

13. Altre persone hanno dovuto occuparsi, nelle ultime due settimane, dei lavori di casa che normalmente tu svolgi, a causa dei tuoi problemi di salute?

- ☐ No
- ☐ Si', (puoi segnare anche piu' di una risposta):
  - ☐ Familiari, per .....ore
  - ☐ Altre persone non retribuite, per ..... ore
  - ☐ Altro aiuto retribuito, per ..... ore

Questa e' la fine del questionario. Grazie molte per la tua collaborazione.

Nello spazio sottostante puoi annotare ogni suggerimento o commento tu voglia fare a proposito del questionario:

.....

.....

.....

.....

## 16. ENCLOSURE D

**Lettera per il paziente: descrizione dello studio PARITY-02**

Ranica, June 2013

Gentile Signore/a,

Con l'obiettivo di ottenere informazioni sempre più esaurienti riferite al Suo stato di salute, riteniamo di estrema utilità chiederLe di compilare i due questionari che accompagnano questa lettera. Il progetto prende il nome di PARITY-02 ed ha come scopo quello di valutare la qualità della vita e i costi sociali nei pazienti colpiti da malattie renali di origine non diabetica.

Ciò rientra nell'ambito di un'iniziativa della nostra struttura di Day Hospital, che pone l'accento sulla rilevazione di alcune informazioni specificate di seguito.

In particolare, il primo questionario che Le verrà consegnato, denominato Short Form Quality of Life Questionnaire (SF36, Versione 1), pone domande su cosa Lei pensa della Sua salute e su come riesce a svolgere le Sue attività quotidiane, sul dolore, su alcuni aspetti di natura psicologica e relazionale.

Il secondo questionario, Short Form Health and Quality Questionnaire (SF-HLQ), riguarda gli effetti dei problemi di salute sul Suo lavoro, sulle Sue condizioni economiche e sulla capacità a svolgere i lavori domestici.

La compilazione dei due questionari Le verrà richiesta con cadenza annuale, in base alla durata dello studio clinico, a cui sta partecipando. Se sarà necessario, può farsi aiutare nella compilazione da persona che l'accompagna.

E' molto importante sottolineare che i questionari Le saranno sottoposti, solo se Lei lo vorrà e che ciò avverrà in forma del tutto anonima.

Siamo a Sua disposizione per eventuali richieste o chiarimenti e La ringraziamo per l'attenzione dedicata.

Cordiali Saluti.

Dr. ----- ed il gruppo degli operatori del Day Hospital

**20. ENCLOSURE E**

***Informativa al trattamento dei dati personali e modulo di consenso PARITY-02*****Studio PARITY-02 – Informativa al trattamento dei dati personali e modulo di consenso****Studio PARITY-02****Qualità della vita e valutazione dei costi sociali nei pazienti con malattie renali croniche non di origine diabetica**

Proposta di partecipazione ad uno studio osservazionale volto a valutare la Qualità della Vita e i Costi Sociali in pazienti affetti da malattie renali di origine non diabetica attraverso la compilazione di due questionari:

- Short Form Quality of Life Questionnaire SF 36 (Versione 1)
- Short Form Health and Labour Questionnaire SF-HLQ.

**Informativa sul trattamento dei dati personali****Titolari del trattamento e relative finalità**

Il Centro di Ricerche Cliniche per le Malattie Rare Aldo e Cele Daccò dell' IRCCS - Istituto di Ricerche Farmacologiche Mario Negri è promotore dello studio che Le è stato descritto, in accordo alle responsabilità previste dalle norme di Buona Pratica Clinica (d.l. 211/2003). Tratterà i Suoi dati personali (stato di salute, condizione economica e lavorativa) e quelli demografici (data di nascita, sesso, peso, statura) saranno raccolti e trattati esclusivamente in funzione delle finalità dello studio. Il rifiuto di conferirli non consentirà la Sua partecipazione allo studio.

Tutti i dati saranno resi anonimi, registrati, elaborati e conservati dall' IRCCS - Istituto di Ricerche Farmacologiche Mario Negri. Soltanto i soggetti autorizzati potranno collegare il numero di codice, che le sarà attribuito, al Suo nominativo. Anche i dati clinici che La riguardano, contenuti nella Sua documentazione clinica originale potranno essere utilizzati dal personale preposto allo studio, dal Comitato Etico e dalle Autorità Sanitarie, con modalità tali da garantire l'assoluta riservatezza.

**Modalità del trattamento**

I risultati di analisi statistiche dei dati raccolti, mediante strumenti elettronici, saranno diffusi in forma rigorosamente anonima, ad esempio attraverso pubblicazioni scientifiche e convegni scientifici.

**Esercizio dei diritti**

Lei potrà esercitare in ogni momento i diritti, di cui all'art. 7 del Codice Civile in materia di protezione dei dati personali (es. accedervi, integrarli, aggiornarli, rettificarli, opporsi al loro trattamento per motivi legittimi, ecc.) rivolgendosi direttamente al personale dell' IRCCS - Istituto di Ricerche Farmacologiche

Mario Negri. Lei potrà comunque interrompere in ogni momento, e senza fornire alcuna giustificazione, la Sua partecipazione allo studio.

## Consenso

Io sottoscritto/a \_\_\_\_\_

Nato/a a: \_\_\_\_\_ (Prov. \_\_\_\_\_), il: \_\_\_\_/\_\_\_\_/\_\_\_\_

Presa visione dell'informativa, esprimo il consenso, ai sensi del D.Lgs 196/03 in materia di tutela dei dati personali, al trattamento dei miei dati ed alla consultazione della mia cartella clinica per gli scopi della ricerca nei limiti e con le modalità indicate nell'informativa fornitami con il presente documento.

Dichiaro inoltre che la natura dello studio in oggetto mi è stata completamente spiegata.

Ho avuto la possibilità di porre domande, valutare le risposte ricevute e ho compreso pienamente tutte le informazioni fornitami sugli scopi, i metodi, i possibili benefici e i potenziali rischi dello studio. La mia partecipazione è volontaria e posso ritirarmi dallo studio in qualsiasi momento; questo non comprometterà le attenzioni e le cure che riceverò in futuro dai miei medici curanti.

Pertanto volontariamente e liberamente

Acconsento

Non acconsento

A partecipare allo studio e all'uso dei dati personali come indicato nella nota informativa.

Firma del paziente \_\_\_\_\_ Data \_\_\_\_\_

Firma del Testimone imparziale \_\_\_\_\_ Data \_\_\_\_\_  
(se applicabile)

Confermo di aver spiegato la natura di questo studio al paziente.

Firma del medico \_\_\_\_\_ Data \_\_\_\_\_

Qualora accettasse di partecipare a questo studio, riceverà una copia o un originale di questo modulo di consenso informato, firmato e datato per la Sua documentazione privata.

## **TABLE TEMPLATES**

TABLE 1.1

ANALYSIS POPULATIONS

|                   | Octreotide-LAR | Placebo  | Total    |
|-------------------|----------------|----------|----------|
| Full Analysis Set | xx (xx%)       | xx (xx%) | xx (xx%) |
| Overall           | xx (xx%)       | xx (xx%) | xx (xx%) |
| Peripheral Site 1 | xx (xx%)       | xx (xx%) | xx (xx%) |
| ●                 | xx (xx%)       | xx (xx%) | xx (xx%) |
| ●                 | xx (xx%)       | xx (xx%) | xx (xx%) |
| ●                 | xx (xx%)       | xx (xx%) | xx (xx%) |
| Peripheral Site n | xx (xx%)       | xx (xx%) | xx (xx%) |
| Per Protocol Set  | xx (xx%)       | xx (xx%) | xx (xx%) |
| Overall           | xx (xx%)       | xx (xx%) | xx (xx%) |
| Peripheral Site 1 | xx (xx%)       | xx (xx%) | xx (xx%) |
| ●                 | xx (xx%)       | xx (xx%) | xx (xx%) |
| ●                 | xx (xx%)       | xx (xx%) | xx (xx%) |
| ●                 | xx (xx%)       | xx (xx%) | xx (xx%) |
| Peripheral Site n | xx (xx%)       | xx (xx%) | xx (xx%) |

TABLE 1.2

NUMBER OF RANDOMISED PATIENTS AT EACH VISIT

|                                                       | Octreotide-LAR | Placebo  | Total    |
|-------------------------------------------------------|----------------|----------|----------|
| Visit 2 (Month 0)                                     |                |          |          |
| Full Analysis Set                                     | xx             | xx       | xx       |
| Per Protocol Population                               | xx             | xx       | xx       |
| Visit 4 (Month 6)                                     |                |          |          |
| Full Analysis Set                                     | xx (xx%)       | xx (xx%) | xx (xx%) |
| Per Protocol Population                               | xx (xx%)       | xx (xx%) | xx (xx%) |
| Visit 6 (Month 12)                                    |                |          |          |
| Full Analysis Set                                     | xx (xx%)       | xx (xx%) | xx (xx%) |
| Per Protocol Population                               | xx (xx%)       | xx (xx%) | xx (xx%) |
| Visit 8 (Month 18)                                    |                |          |          |
| Full Analysis Set                                     | xx (xx%)       | xx (xx%) | xx (xx%) |
| Per Protocol Population                               | xx (xx%)       | xx (xx%) | xx (xx%) |
| •                                                     |                |          |          |
| •                                                     |                |          |          |
| •                                                     |                |          |          |
| At 6 monthly intervals until final (at least 3 years) |                |          |          |

TABLE 1.3

REASONS FOR WITHDRAWAL

|                           | Octreotide-LAR Placebo |          | Total    |
|---------------------------|------------------------|----------|----------|
| Number of Patients        | xx                     | xx       | xx       |
| ESRD                      | xx (xx%)               | xx (xx%) | xx (xx%) |
| Unsatisfactory efficacy   | xx (xx%)               | xx (xx%) | xx (xx%) |
| Unsatisfactory compliance | xx (xx%)               | xx (xx%) | xx (xx%) |
| Protocol violation        | xx (xx%)               | xx (xx%) | xx (xx%) |
| Lost to follow-up         | xx (xx%)               | xx (xx%) | xx (xx%) |
| Withdrawal of consent     | xx (xx%)               | xx (xx%) | xx (xx%) |
| Adverse event             | xx (xx%)               | xx (xx%) | xx (xx%) |
| Death                     | xx (xx%)               | xx (xx%) | xx (xx%) |

Population: Full Analysis Set

TABLE 1.4.1

MAJOR PROTOCOL VIOLATIONS

|                               | Octreotide-LAR Placebo |          | Total    |
|-------------------------------|------------------------|----------|----------|
| Number of Patients            | xx                     | xx       | xx       |
| Major protocol violation N. 1 | xx (xx%)               | xx (xx%) | xx (xx%) |
| ...                           | xx (xx%)               | xx (xx%) | xx (xx%) |
| ...                           | xx (xx%)               | xx (xx%) | xx (xx%) |
| ...                           | xx (xx%)               | xx (xx%) | xx (xx%) |
| ...                           | xx (xx%)               | xx (xx%) | xx (xx%) |
| ...                           | xx (xx%)               | xx (xx%) | xx (xx%) |
| ...                           | xx (xx%)               | xx (xx%) | xx (xx%) |
| Major protocol violation N. n | xx (xx%)               | xx (xx%) | xx (xx%) |

Population: Full Analysis Set

TABLE 1.4.2

MINOR PROTOCOL VIOLATIONS

|                               | Octreotide-LAR Placebo |          | Total    |
|-------------------------------|------------------------|----------|----------|
| Number of Patients            | xx                     | xx       | xx       |
| Minor protocol violation N. 1 | xx (xx%)               | xx (xx%) | xx (xx%) |
| ...                           | xx (xx%)               | xx (xx%) | xx (xx%) |
| ...                           | xx (xx%)               | xx (xx%) | xx (xx%) |
| ...                           | xx (xx%)               | xx (xx%) | xx (xx%) |
| ...                           | xx (xx%)               | xx (xx%) | xx (xx%) |
| ...                           | xx (xx%)               | xx (xx%) | xx (xx%) |
| ...                           | xx (xx%)               | xx (xx%) | xx (xx%) |
| Minor protocol violation N. n | xx (xx%)               | xx (xx%) | xx (xx%) |

Population: Full Analysis Set

TABLE 1.5

**ADHERENCE TO STUDY SCHEDULE**

| Scheduled Time of Visit<br>Actual Time of Visit       | Octreotide-LAR | Placebo  | Total    |
|-------------------------------------------------------|----------------|----------|----------|
| Visit 3 (3 Months)                                    |                |          |          |
| Number of Patients                                    | XX             | XX       | XX       |
| >4 days before                                        | XX (XX%)       | XX (XX%) | XX (XX%) |
| >2 days before                                        | XX (XX%)       | XX (XX%) | XX (XX%) |
| on-time                                               | XX (XX%)       | XX (XX%) | XX (XX%) |
| >2 days after                                         | XX (XX%)       | XX (XX%) | XX (XX%) |
| >4 days after                                         | XX (XX%)       | XX (XX%) | XX (XX%) |
| Visit 4 (6 Months)                                    |                |          |          |
| Number of Patients                                    | XX             | XX       | XX       |
| >2 weeks before                                       | XX (XX%)       | XX (XX%) | XX (XX%) |
| >1 week before                                        | XX (XX%)       | XX (XX%) | XX (XX%) |
| on-time                                               | XX (XX%)       | XX (XX%) | XX (XX%) |
| >1 week after                                         | XX (XX%)       | XX (XX%) | XX (XX%) |
| >2 weeks after                                        | XX (XX%)       | XX (XX%) | XX (XX%) |
| Visit 6 (12Months)                                    |                |          |          |
| Number of Patients                                    | XX             | XX       | XX       |
| >2 weeks before                                       |                |          |          |
| >1 week before                                        | XX (XX%)       | XX (XX%) | XX (XX%) |
| on-time                                               | XX (XX%)       | XX (XX%) | XX (XX%) |
| >1 week after                                         | XX (XX%)       | XX (XX%) | XX (XX%) |
| >2 weeks after                                        | XX (XX%)       | XX (XX%) | XX (XX%) |
| •                                                     |                |          |          |
| •                                                     |                |          |          |
| •                                                     |                |          |          |
| At 6 monthly intervals until final (at least 3 years) |                |          |          |

**Population: Full Analysis Set**

TABLE 2.1.1

**DEMOGRAPHY**

|                              | Octreotide-LAR    | Placebo          | Total            |
|------------------------------|-------------------|------------------|------------------|
| <b>Number of Patients</b>    | <b>xx</b>         | <b>xx</b>        | <b>xx</b>        |
| Age (years) at randomization |                   |                  |                  |
| Mean (sd)                    | xx.x (xx.xx)      | xx (x.xx)        | xx (xx.xx)       |
| Median [Q1 to Q3]            | xx.x [x.x to x.x] | xx.x[x.x to x.x] | xx.x[x.x to x.x] |
| Minimum                      | xx                | xx               | xx               |
| Maximum                      | xx                | xx               | xx               |
| n                            |                   |                  |                  |
| <40                          | xx (xx%)          | xx (xx%)         | xx (xx%)         |
| 40-49                        | xx (xx%)          | xx (xx%)         | xx (xx%)         |
| 50-59                        | xx (xx%)          | xx (xx%)         | xx (xx%)         |
| 60-69                        | xx (xx%)          | xx (xx%)         | xx (xx%)         |
| 70-79                        | xx (xx%)          | xx (xx%)         | xx (xx%)         |
| >79                          | xx (xx%)          | xx (xx%)         | xx (xx%)         |
| Sex                          |                   |                  |                  |
| Male                         | xx (xx%)          | xx (xx%)         | xx (xx%)         |
| Female                       | xx (xx%)          | xx (xx%)         | xx (xx%)         |
| Race                         |                   |                  |                  |
| Caucasian                    | xx (xx%)          | xx (xx%)         | xx (xx%)         |
| Black                        | xx (xx%)          | xx (xx%)         | xx (xx%)         |
| Asian                        | xx (xx%)          | xx (xx%)         | xx (xx%)         |
| Other                        | xx (xx%)          | xx (xx%)         | xx (xx%)         |

**Population: Full Analysis Set**

*[Note: All tables in Section 2 will additionally be produced for the Per Protocol Set and according to Stratum CCC absent or Stratum CCC present]*

TABLE 2.2.1

**VITAL SIGNS AT VISIT 2 (MONTH 0)**

|                                      | Octreotide-LAR | Placebo        | Total          |
|--------------------------------------|----------------|----------------|----------------|
| <b>Number of Patients</b>            | <b>xx</b>      | <b>xx</b>      | <b>xx</b>      |
| Mean systolic blood pressure (mmHg)  |                |                |                |
| Mean (sd)                            | xxx.x (xxx.xx) | xxx.x (xxx.xx) | xxx.x (xxx.xx) |
| Median                               | xxx.x          | xxx.x          | xxx.x          |
| Minimum                              | xxx            | xxx            | xxx            |
| Maximum                              | xxx            | xxx            | xxx            |
| n                                    | xx             | xx             | xx             |
| Mean diastolic blood pressure (mmHg) |                |                |                |
| Mean (sd)                            | xxx.x (xxx.xx) | xxx.x (xxx.xx) | xxx.x (xxx.xx) |
| Median                               | xxx.x          | xxx.x          | xxx.x          |
| Minimum                              | xxx            | xxx            | xxx            |
| Maximum                              | xxx            | xxx            | xxx            |
| n                                    | xx             | xx             | xx             |
| Mean arterial pressure (mmHg)        |                |                |                |
| Mean (sd)                            | xxx.x (xxx.xx) | xxx.x (xxx.xx) | xxx.x (xxx.xx) |
| Median                               | xxx.x          | xxx.x          | xxx.x          |
| Minimum                              | xxx            | xxx            | xxx            |
| Maximum                              | xx             | xx             | xx             |
| n                                    |                |                |                |
| Mean heart rate (bpm)                |                |                |                |
| Mean (sd)                            | xxx.x (xxx.xx) | xxx.x (xxx.xx) | xxx.x (xxx.xx) |
| Median                               | xxx.x          | xxx.x          | xxx.x          |
| Minimum                              | xxx            | xxx            | xxx            |
| Maximum                              | xxx            | xxx            | xxx            |
| n                                    | xx             | xx             | xx             |
| Weight (Kg)                          |                |                |                |
| Mean (sd)                            | xxx.x (xxx.xx) | xxx.x (xxx.xx) | xxx.x (xxx.xx) |
| Median                               | xxx.x          | xxx.x          | xxx.x          |
| Minimum                              | xxx            | xxx            | xxx            |
| Maximum                              | xxx            | xxx            | xxx            |
| n                                    | xx             | xx             | xx             |
| ECG result                           |                |                |                |
| Normal                               | xx (xx%)       | xx (xx%)       | xx (xx%)       |
| Pathological                         | xx (xx%)       | xx (xx%)       | xx (xx%)       |

**Population: Full Analysis Set**

TABLE 2.3.1

**TKV and height-adjusted TKV AT VISIT 2 (MONTH 0)**

|            | Octreotide-LAR    | Placebo           | Total             |
|------------|-------------------|-------------------|-------------------|
| TKV (ml)   |                   |                   |                   |
| Mean (sd)  | xxx.xxx (xxx.xxx) | xxx.xxx (xxx.xxx) | xxx.xxx (xxx.xxx) |
| Median     | xxx.xxx           | xxx.xxx           | xxx.xxx           |
| Q1         | xxx.xx            | xxx.xx            | xxx.xx            |
| Q3         | xxx.xx            | xxx.xx            | xxx.xx            |
| Minimum    | xxx.xx            | xxx.xx            | xxx.xx            |
| Maximum    | xxx.xx            | xxx.xx            | xxx.xx            |
| N          | xx                | xx                | xx                |
| HtTKV (ml) | xxx.xxx (xxx.xxx) | xxx.xxx (xxx.xxx) | xxx.xxx (xxx.xxx) |
| Mean (sd)  | xxx.xxx           | xxx.xxx           | xxx.xxx           |
| Median     | xxx.xx            | xxx.xx            | xxx.xx            |
| Q1         | xxx.xx            | xxx.xx            | xxx.xx            |
| Q3         | xxx.xx            | xxx.xx            | xxx.xx            |
| Minimum    | xxx.xx            | xxx.xx            | xxx.xx            |
| Maximum    | xx                | xx                | xx                |
| n          |                   |                   |                   |

**Population: Full Analysis Set**

TABLE 2.4.1

**MEASURED GLOMERULAR FILTRATION RATE AT VISIT 2 (MONTH 0)**

|                                     | Octreotide-LAR    | Placebo           | Total             |
|-------------------------------------|-------------------|-------------------|-------------------|
| mGFR (ml/min x 1.73m <sup>2</sup> ) |                   |                   |                   |
| Mean (sd)                           | xxx.xxx (xxx.xxx) | xxx.xxx (xxx.xxx) | xxx.xxx (xxx.xxx) |
| Median                              | xxx.xxx           | xxx.xxx           | xxx.xxx           |
| Q1                                  | xxx.xx            | xxx.xx            | xxx.xx            |
| Q3                                  | xxx.xx            | xxx.xx            | xxx.xx            |
| Minimum                             | xxx.xx            | xxx.xx            | xxx.xx            |
| Maximum                             | xxx.xx            | xxx.xx            | xxx.xx            |
| n                                   | xx                | xx                | xx                |

**Population: Full Analysis Set**

*[Note: Tables 2.5-2.46 will be produced in a similar format]*

TABLE 2.47.1

PREVIOUS DISEASES

|                   | Octreotide-LAR | Placebo  | Total    |
|-------------------|----------------|----------|----------|
| Numer of Patients | xx             | xx       | xx       |
| Preferred Term 1  | xx (xx%)       | xx (xx%) | xx (xx%) |
| •                 | •              | •        | •        |
| •                 | •              | •        | •        |
| •                 | •              | •        | •        |
| Preferred Term n  | xx (xx%)       | xx (xx%) | xx (xx%) |

Population: Full Analysis Set

TABLE 2.48.1

PREVIOUS MEDICATION/NON-DRUG THERAPY

|                   | Octreotide-LAR | Placebo  | Total    |
|-------------------|----------------|----------|----------|
| Numer of Patients | xx             | xx       | xx       |
| Preferred Term 1  | xx (xx%)       | xx (xx%) | xx (xx%) |
| •                 | •              | •        | •        |
| •                 | •              | •        | •        |
| •                 | •              | •        | •        |
| Preferred Term n  | xx (xx%)       | xx (xx%) | xx (xx%) |

Population: Full Analysis Set

TABLE 2.49.1

CONCOMITANT DISEASES

|                          | Octreotide-LAR         | Placebo                | Total                  |
|--------------------------|------------------------|------------------------|------------------------|
| <b>Numer of Patients</b> | <b>xx</b>              | <b>xx</b>              | <b>xx</b>              |
| Preferred Term 1         | xx (xx <sup>0</sup> %) | xx (xx <sup>0</sup> %) | xx (xx <sup>0</sup> %) |
| •                        | •                      | •                      | •                      |
| •                        | •                      | •                      | •                      |
| •                        | •                      | •                      | •                      |
| Preferred Term n         | xx (xx <sup>0</sup> %) | xx (xx <sup>0</sup> %) | xx (xx <sup>0</sup> %) |

Population: Full Analysis Set

TABLE 2.50.1

CONCOMITANT MEDICATION/NON-DRUG THERAPY

|                    | Octreotide-LAR         | Placebo                | Total                  |
|--------------------|------------------------|------------------------|------------------------|
| Number of Patients | xx                     | xx                     | xx                     |
| Preferred Term 1   | xx (xx <sup>0</sup> %) | xx (xx <sup>0</sup> %) | xx (xx <sup>0</sup> %) |
| •                  | •                      | •                      | •                      |
| •                  | •                      | •                      | •                      |
| •                  | •                      | •                      | •                      |
| Preferred Term n   | xx (xx <sup>0</sup> %) | xx (xx <sup>0</sup> %) | xx (xx <sup>0</sup> %) |

Population: Full Analysis Set

**Table 3.1.1** . TKV and height-adjusted TKV, and absolute changes in kidney and cyst volume in participants randomized to Octreotide-LAR or placebo (overall: stratum CCC absent+ stratum CCC present)

|       |                         | Octreotide-LAR     |                                     |                                     | Placebo            |                                     |
|-------|-------------------------|--------------------|-------------------------------------|-------------------------------------|--------------------|-------------------------------------|
|       |                         | 0                  | 1                                   | 3                                   | 0                  | Y                                   |
|       |                         | Years              |                                     |                                     |                    |                                     |
| TKV   | Mean (SD) (mL)          | xx.xx (xx.xx)      | xx.xx (xx.xx)                       | xx.xx (xx.xx)                       | xx.xx (xx.xx)      | xx.xx (xx.xx)                       |
|       | Median [IQR]            | xx.xx [x.x to x.x] | xx.xx [x.x to x.x]                  | xx.xx [x.x to x.x]                  | xx.xx [x.x to x.x] | xx.xx [x.x to x.x]                  |
|       | p value vs.plac. at 1 y |                    |                                     |                                     |                    |                                     |
|       | p value vs.plac. at 3 y |                    |                                     |                                     |                    |                                     |
|       |                         |                    |                                     |                                     |                    |                                     |
|       | Absolute change (mL)    | --                 | xx.xx (xx.xx)<br>xx.xx [x.x to x.x] | xx.xx (xx.xx)<br>xx.xx [x.x to x.x] | --                 | xx.xx (xx.xx)<br>xx.xx [x.x to x.x] |
|       | Annual slope (mL/year)  |                    |                                     | xx.xx (xx.xx)<br>xx.xx [x.x to x.x] |                    |                                     |
|       | Chronic slope (mL/year) |                    |                                     | xx.xx (xx.xx)<br>xx.xx [x.x to x.x] |                    |                                     |
| htTKV | Mean (SD) (mL)          | xx.xx (xx.xx)      | xx.xx (xx.xx)                       | xx.xx (xx.xx)                       | xx.xx (xx.xx)      | xx.xx (xx.xx)                       |
|       | Median [IQR]            | xx.xx [x.x to x.x] | xx.xx [x.x to x.x]                  | xx.xx [x.x to x.x]                  | xx.xx [x.x to x.x] | xx.xx [x.x to x.x]                  |
|       | p value vs.plac. at 1 y |                    |                                     |                                     |                    |                                     |
|       | p value vs.plac. at 3 y |                    |                                     |                                     |                    |                                     |
|       |                         |                    |                                     |                                     |                    |                                     |
|       | Absolute change (mL)    | --                 | xx.xx (xx.xx)<br>xx.xx [x.x to x.x] | xx.xx (xx.xx)<br>xx.xx [x.x to x.x] | --                 | xx.xx (xx.xx)<br>xx.xx [x.x to x.x] |
|       | Annual slope (mL/year)  |                    |                                     | xx.xx (xx.xx)<br>xx.xx [x.x to x.x] |                    |                                     |
|       | Chronic slope (mL/year) |                    |                                     | xx.xx (xx.xx)<br>xx.xx [x.x to x.x] |                    |                                     |

TKV, Total Kidney Volume; htTKV, Height –adjusted Total Kidney Volume

**Table 3.1.2** TKV and height-adjusted TKV, and absolute changes in kidney and cyst volume in participants randomized to Octreotide-LAR or placebo. Stratum: CCC absent

|       |                         | Octreotide-LAR     |                                     |                                     | Placebo            |                                     |
|-------|-------------------------|--------------------|-------------------------------------|-------------------------------------|--------------------|-------------------------------------|
|       |                         | 0                  | 1                                   | 3                                   | 0                  | Y                                   |
|       |                         | Years              |                                     |                                     |                    | Y                                   |
| TKV   | Mean (SD) (mL)          | xx.xx (xx.xx)      | xx.xx (xx.xx)                       | xx.xx (xx.xx)                       | xx.xx (xx.xx)      | xx.xx (xx.xx)                       |
|       | Median [IQR]            | xx.xx [x.x to x.x] | xx.xx [x.x to x.x]                  | xx.xx [x.x to x.x]                  | xx.xx [x.x to x.x] | xx.xx [x.x to x.x]                  |
|       | p value vs.plac. at 1 y |                    |                                     |                                     |                    |                                     |
|       | p value vs.plac. at 3 y |                    |                                     |                                     |                    |                                     |
|       | Absolute change (mL)    | --                 | xx.xx (xx.xx)<br>xx.xx [x.x to x.x] | xx.xx (xx.xx)<br>xx.xx [x.x to x.x] | --                 | xx.xx (xx.xx)<br>xx.xx [x.x to x.x] |
| htTKV | Annual slope (mL/year)  |                    |                                     | xx.xx (xx.xx)<br>xx.xx [x.x to x.x] |                    | xx.xx (xx.xx)<br>xx.xx [x.x to x.x] |
|       | Chronic slope (mL/year) |                    |                                     | xx.xx (xx.xx)<br>xx.xx [x.x to x.x] |                    | xx.xx (xx.xx)<br>xx.xx [x.x to x.x] |
|       | Mean (SD) (mL)          | xx.xx (xx.xx)      | xx.xx (xx.xx)                       | xx.xx (xx.xx)                       | xx.xx (xx.xx)      | xx.xx (xx.xx)                       |
|       | Median [IQR]            | xx.xx [x.x to x.x] | xx.xx [x.x to x.x]                  | xx.xx [x.x to x.x]                  | xx.xx [x.x to x.x] | xx.xx [x.x to x.x]                  |
|       | p value vs.plac. at 1 y |                    |                                     |                                     |                    |                                     |
|       | p value vs.plac. at 3 y |                    |                                     |                                     |                    |                                     |
|       | Absolute change (mL)    | --                 | xx.xx (xx.xx)<br>xx.xx [x.x to x.x] | xx.xx (xx.xx)<br>xx.xx [x.x to x.x] | --                 | xx.xx (xx.xx)<br>xx.xx [x.x to x.x] |
|       | Annual slope (mL/year)  |                    |                                     | xx.xx (xx.xx)<br>xx.xx [x.x to x.x] |                    | xx.xx (xx.xx)<br>xx.xx [x.x to x.x] |
|       | Chronic slope (mL/year) |                    |                                     | xx.xx (xx.xx)<br>xx.xx [x.x to x.x] |                    | xx.xx (xx.xx)<br>xx.xx [x.x to x.x] |

TKV, Total Kidney Volume; htTKV, Height –adjusted Total Kidney Volume.

**Table 3.1.3** TKV and height-adjusted TKV, and absolute changes in kidney and cyst volume in participants randomized to Octreotide-LAR or placebo. Stratum: CCC present

|       |                         | Octreotide-LAR     |                                     |                                     | Placebo            |                                     |
|-------|-------------------------|--------------------|-------------------------------------|-------------------------------------|--------------------|-------------------------------------|
|       |                         | 0                  | 1                                   | 3                                   | 0                  | Y                                   |
|       |                         | Years              |                                     |                                     |                    |                                     |
| TKV   | Mean (SD) (mL)          | xx.xx (xx.xx)      | xx.xx (xx.xx)                       | xx.xx (xx.xx)                       | xx.xx (xx.xx)      | xx.xx (xx.xx)                       |
|       | Median [IQR]            | xx.xx [x.x to x.x] | xx.xx [x.x to x.x]                  | xx.xx [x.x to x.x]                  | xx.xx [x.x to x.x] | xx.xx [x.x to x.x]                  |
|       | p value vs.plac. at 1 y |                    |                                     |                                     |                    |                                     |
|       | p value vs.plac. at 3 y |                    |                                     |                                     |                    |                                     |
|       |                         |                    |                                     |                                     |                    |                                     |
|       | Absolute change (mL)    | --                 | xx.xx (xx.xx)<br>xx.xx [x.x to x.x] | xx.xx (xx.xx)<br>xx.xx [x.x to x.x] | --                 | xx.xx (xx.xx)<br>xx.xx [x.x to x.x] |
|       | Annual slope (mL/year)  |                    |                                     | xx.xx (xx.xx)<br>xx.xx [x.x to x.x] |                    |                                     |
|       | Chronic slope (mL/year) |                    |                                     | xx.xx (xx.xx)<br>xx.xx [x.x to x.x] |                    |                                     |
| htTKV | Mean (SD) (mL)          | xx.xx (xx.xx)      | xx.xx (xx.xx)                       | xx.xx (xx.xx)                       | xx.xx (xx.xx)      | xx.xx (xx.xx)                       |
|       | Median [IQR]            | xx.xx [x.x to x.x] | xx.xx [x.x to x.x]                  | xx.xx [x.x to x.x]                  | xx.xx [x.x to x.x] | xx.xx [x.x to x.x]                  |
|       | p value vs.plac. at 1 y |                    |                                     |                                     |                    |                                     |
|       | p value vs.plac. at 3 y |                    |                                     |                                     |                    |                                     |
|       |                         |                    |                                     |                                     |                    |                                     |
|       | Absolute change (mL)    | --                 | xx.xx (xx.xx)<br>xx.xx [x.x to x.x] | xx.xx (xx.xx)<br>xx.xx [x.x to x.x] | --                 | xx.xx (xx.xx)<br>xx.xx [x.x to x.x] |
|       | Annual slope (mL/year)  |                    |                                     | xx.xx (xx.xx)<br>xx.xx [x.x to x.x] |                    |                                     |
|       | Chronic slope (mL/year) |                    |                                     | xx.xx (xx.xx)<br>xx.xx [x.x to x.x] |                    |                                     |

TKV, Total Kidney Volume; htTKV, Height –adjusted Total Kidney Volume.

Table 3.2. Measured Glomerular Filtration Rate (mGFR) at baseline, 6-month, and 1-year, 2-year and 3-year follow-up in the study group as a whole (Overall), and in the two strata (CCC absent or CCC present) considered separately according to treatment with Octreotide-LAR or placebo.

|                |                              | OCTREOTIDE-LAR         |                        |                        |                        |                        |                        |                        |
|----------------|------------------------------|------------------------|------------------------|------------------------|------------------------|------------------------|------------------------|------------------------|
|                |                              | Baseline<br>(n=xx)     | 6 mo<br>(n=xx)         | 1 yr<br>(n=xx)         | 2 yrs<br>(n=xx)        | 3 yrs<br>(n=xx)        | Baseline<br>(n=xx)     | 6 mo<br>(n=xx)         |
| Overall        | Actual value*                | xx.x<br>[xx.x to xx.x] |
|                | Total Slope°<br>0-3 yrs      |                        |                        |                        |                        | xx.x<br>[xx.x to xx.x] |                        |                        |
|                | Chronic slope°<br>6 mo-3 yrs |                        |                        |                        |                        | xx.x<br>[xx.x to xx.x] |                        |                        |
| CCC<br>absent  | Actual value*                | xx.x<br>[xx.x to xx.x] |
|                | Total Slope<br>0-3 yrs       |                        |                        |                        |                        | xx.x<br>[xx.x to xx.x] |                        |                        |
|                | Chronic slope<br>6 mo-3 yrs  |                        |                        |                        |                        | xx.x<br>[xx.x to xx.x] |                        |                        |
| CCC<br>present | Actual value*                | xx.x<br>[xx.x to xx.x] |
|                | Total Slope<br>0-3 yrs       |                        |                        |                        |                        | xx.x<br>[xx.x to xx.x] |                        |                        |
|                | Chronic slope<br>6 mo-3 yrs  |                        |                        |                        |                        | xx.x<br>[xx.x to xx.x] |                        |                        |

Annual slope value is median [interquartile range, IQR].mGFR=measured glomerular filtration rate, \* ml/min/1.73m<sup>2</sup>; ° ml/min/1.73m<sup>2</sup>per year

[Note: All tables in Section 3 will additionally be produced for the Per Protocol Set and according to Stratum CCC absent or Stratum CCC present]

TABLE 3.3.1

**SYSTOLIC BLOOD PRESSURE (mmHg) OVER TIME: SUMMARY**

|                                                             | Octreotide-LAR | Placebo        |
|-------------------------------------------------------------|----------------|----------------|
| Visit 2 (Month 0)                                           |                |                |
| Mean (sd)                                                   | xxx.x (xxx.xx) | xxx.x (xxx.xx) |
| Median                                                      | xxx.x          | xxx.x          |
| Minimum                                                     | xxx            | xxx            |
| Maximum                                                     | xxx            | xxx            |
| n                                                           | xx             | xx             |
| Visit 3 (Month 3)                                           |                |                |
| Mean (sd)                                                   | xxx.x (xxx.xx) | xxx.x (xxx.xx) |
| Median                                                      | xxx.x          | xxx.x          |
| Minimum                                                     | xxx            | xxx            |
| Maximum                                                     | xxx            | xxx            |
| n                                                           | xx             | xx             |
| Visit 4 (Month 6)                                           |                |                |
| Mean (sd)                                                   | xxx.x (xxx.xx) | xxx.x (xxx.xx) |
| Median                                                      | xxx.x          | xxx.x          |
| Minimum                                                     | xxx            | xxx            |
| Maximum                                                     | xxx            | xxx            |
| n                                                           | xx             | xx             |
| Visit 5 (Month 9)                                           |                |                |
| Mean (sd)                                                   | xxx.x (xxx.xx) | xxx.x (xxx.xx) |
| Median                                                      | xxx.x          | xxx.x          |
| Minimum                                                     | xxx            | xxx            |
| Maximum                                                     | xxx            | xxx            |
| n                                                           | xx             | xx             |
| Visit 6 (Month 12)                                          |                |                |
| Mean (sd)                                                   | xxx.x (xxx.xx) | xxx.x (xxx.xx) |
| Median                                                      | xxx.x          | xxx.x          |
| Minimum                                                     | xxx            | xxx            |
| Maximum                                                     | xxx            | xxx            |
| n                                                           | xx             | xx             |
| Visit 7 (Month 15)                                          |                |                |
| Mean (sd)                                                   | xxx.x (xxx.xx) | xxx.x (xxx.xx) |
| Median                                                      | xxx.x          | xxx.x          |
| Minimum                                                     | xxx            | xxx            |
| Maximum                                                     | xxx            | xxx            |
| n                                                           | xx             | xx             |
| ●                                                           | ●              | ●              |
| ●                                                           | ●              | ●              |
| At 3 monthly intervals until final visit (at least 3 years) |                |                |

**Population: Full Analysis Set**

TABLE 3.4.1

**DIASTOLIC BLOOD PRESSURE (mmHg) OVER TIME: SUMMARY**

|                                                             | Octreotide-LAR | Placebo        |
|-------------------------------------------------------------|----------------|----------------|
| Visit 2 (Month 0)                                           |                |                |
| Mean (sd)                                                   | xxx.x (xxx.xx) | xxx.x (xxx.xx) |
| Median                                                      | xxx.x          | xxx.x          |
| Minimum                                                     | xxx            | xxx            |
| Maximum                                                     | xxx            | xxx            |
| n                                                           | xx             | xx             |
| Visit 3 (Month 3)                                           |                |                |
| Mean (sd)                                                   | xxx.x (xxx.xx) | xxx.x (xxx.xx) |
| Median                                                      | xxx.x          | xxx.x          |
| Minimum                                                     | xxx            | xxx            |
| Maximum                                                     | xxx            | xxx            |
| n                                                           | xx             | xx             |
| Visit 4 (Month 6)                                           |                |                |
| Mean (sd)                                                   | xxx.x (xxx.xx) | xxx.x (xxx.xx) |
| Median                                                      | xxx.x          | xxx.x          |
| Minimum                                                     | xxx            | xxx            |
| Maximum                                                     | xxx            | xxx            |
| n                                                           | xx             | xx             |
| Visit 5 (Month 9)                                           |                |                |
| Mean (sd)                                                   | xxx.x (xxx.xx) | xxx.x (xxx.xx) |
| Median                                                      | xxx.x          | xxx.x          |
| Minimum                                                     | xxx            | xxx            |
| Maximum                                                     | xxx            | xxx            |
| n                                                           | xx             | xx             |
| Visit 6 (Month 12)                                          |                |                |
| Mean (sd)                                                   | xxx.x (xxx.xx) | xxx.x (xxx.xx) |
| Median                                                      | xxx.x          | xxx.x          |
| Minimum                                                     | xxx            | xxx            |
| Maximum                                                     | xxx            | xxx            |
| n                                                           | xx             | xx             |
| Visit 7 (Month 15)                                          |                |                |
| Mean (sd)                                                   | xxx.x (xxx.xx) | xxx.x (xxx.xx) |
| Median                                                      | xxx.x          | xxx.x          |
| Minimum                                                     | xxx            | xxx            |
| Maximum                                                     | xxx            | xxx            |
| n                                                           | xx             | xx             |
| ●                                                           | ●              | ●              |
| ●                                                           | ●              | ●              |
| At 3 monthly intervals until final visit (at least 3 years) |                |                |

**Population: Full Analysis Set**

TABLE 3.5.1

**MEAN ARTERIAL PRESSURE (mmHg) OVER TIME: SUMMARY**

|                                                             | Octreotide-LAR | Placebo        |
|-------------------------------------------------------------|----------------|----------------|
| Visit 2 (Month 0)                                           |                |                |
| Mean (sd)                                                   | xxx.x (xxx.xx) | xxx.x (xxx.xx) |
| Median                                                      | xxx.x          | xxx.x          |
| Minimum                                                     | xxx            | xxx            |
| Maximum                                                     | xxx            | xxx            |
| n                                                           | xx             | xx             |
| Visit 3 (Month 3)                                           |                |                |
| Mean (sd)                                                   | xxx.x (xxx.xx) | xxx.x (xxx.xx) |
| Median                                                      | xxx.x          | xxx.x          |
| Minimum                                                     | xxx            | xxx            |
| Maximum                                                     | xxx            | xxx            |
| n                                                           | xx             | xx             |
| Visit 4 (Month 6)                                           |                |                |
| Mean (sd)                                                   | xxx.x (xxx.xx) | xxx.x (xxx.xx) |
| Median                                                      | xxx.x          | xxx.x          |
| Minimum                                                     | xxx            | xxx            |
| Maximum                                                     | xxx            | xxx            |
| n                                                           | xx             | xx             |
| Visit 5 (Month 9)                                           |                |                |
| Mean (sd)                                                   | xxx.x (xxx.xx) | xxx.x (xxx.xx) |
| Median                                                      | xxx.x          | xxx.x          |
| Minimum                                                     | xxx            | xxx            |
| Maximum                                                     | xxx            | xxx            |
| n                                                           | xx             | xx             |
| Visit 6 (Month 12)                                          |                |                |
| Mean (sd)                                                   | xxx.x (xxx.xx) | xxx.x (xxx.xx) |
| Median                                                      | xxx.x          | xxx.x          |
| Minimum                                                     | xxx            | xxx            |
| Maximum                                                     | xxx            | xxx            |
| n                                                           | xx             | xx             |
| Visit 7 (Month 15)                                          |                |                |
| Mean (sd)                                                   | xxx.x (xxx.xx) | xxx.x (xxx.xx) |
| Median                                                      | xxx.x          | xxx.x          |
| Minimum                                                     | xxx            | xxx            |
| Maximum                                                     | xxx            | xxx            |
| n                                                           | xx             | xx             |
| ●                                                           | ●              | ●              |
| ●                                                           | ●              | ●              |
| At 3 monthly intervals until final visit (at least 3 years) |                |                |

**Population: Full Analysis Set**

TABLE 3.6.1

**Pulse rate (mmHg) OVER TIME: SUMMARY**

|                                                             | Octreotide-LAR | Placebo        |
|-------------------------------------------------------------|----------------|----------------|
| Visit 2 (Month 0)                                           |                |                |
| Mean (sd)                                                   | xxx.x (xxx.xx) | xxx.x (xxx.xx) |
| Median                                                      | xxx.x          | xxx.x          |
| Minimum                                                     | xxx            | xxx            |
| Maximum                                                     | xxx            | xxx            |
| n                                                           | xx             | xx             |
| Visit 3 (Month 3)                                           |                |                |
| Mean (sd)                                                   | xxx.x (xxx.xx) | xxx.x (xxx.xx) |
| Median                                                      | xxx.x          | xxx.x          |
| Minimum                                                     | xxx            | xxx            |
| Maximum                                                     | xxx            | xxx            |
| n                                                           | xx             | xx             |
| Visit 4 (Month 6)                                           |                |                |
| Mean (sd)                                                   | xxx.x (xxx.xx) | xxx.x (xxx.xx) |
| Median                                                      | xxx.x          | xxx.x          |
| Minimum                                                     | xxx            | xxx            |
| Maximum                                                     | xxx            | xxx            |
| n                                                           | xx             | xx             |
| Visit 5 (Month 9)                                           |                |                |
| Mean (sd)                                                   | xxx.x (xxx.xx) | xxx.x (xxx.xx) |
| Median                                                      | xxx.x          | xxx.x          |
| Minimum                                                     | xxx            | xxx            |
| Maximum                                                     | xxx            | xxx            |
| n                                                           | xx             | xx             |
| Visit 6 (Month 12)                                          |                |                |
| Mean (sd)                                                   | xxx.x (xxx.xx) | xxx.x (xxx.xx) |
| Median                                                      | xxx.x          | xxx.x          |
| Minimum                                                     | xxx            | xxx            |
| Maximum                                                     | xxx            | xxx            |
| n                                                           | xx             | xx             |
| Visit 7 (Month 15)                                          |                |                |
| Mean (sd)                                                   | xxx.x (xxx.xx) | xxx.x (xxx.xx) |
| Median                                                      | xxx.x          | xxx.x          |
| Minimum                                                     | xxx            | xxx            |
| Maximum                                                     | xxx            | xxx            |
| n                                                           | xx             | xx             |
| •                                                           | •              | •              |
| •                                                           | •              | •              |
| At 3 monthly intervals until final visit (at least 3 years) |                |                |

**Population: Full Analysis Set**

TABLE 3.7.1

**Weight (Kg) OVER TIME: SUMMARY**

|                                                             | Octreotide-LAR | Placebo        |
|-------------------------------------------------------------|----------------|----------------|
| Visit 2 (Month 0)                                           |                |                |
| Mean (sd)                                                   | xxx.x (xxx.xx) | xxx.x (xxx.xx) |
| Median                                                      | xxx.x          | xxx.x          |
| Minimum                                                     | xxx            | xxx            |
| Maximum                                                     | xxx            | xxx            |
| n                                                           | xx             | xx             |
| Visit 3 (Month 3)                                           |                |                |
| Mean (sd)                                                   | xxx.x (xxx.xx) | xxx.x (xxx.xx) |
| Median                                                      | xxx.x          | xxx.x          |
| Minimum                                                     | xxx            | xxx            |
| Maximum                                                     | xxx            | xxx            |
| n                                                           | xx             | xx             |
| Visit 4 (Month 6)                                           |                |                |
| Mean (sd)                                                   | xxx.x (xxx.xx) | xxx.x (xxx.xx) |
| Median                                                      | xxx.x          | xxx.x          |
| Minimum                                                     | xxx            | xxx            |
| Maximum                                                     | xxx            | xxx            |
| n                                                           | xx             | xx             |
| Visit 5 (Month 9)                                           |                |                |
| Mean (sd)                                                   | xxx.x (xxx.xx) | xxx.x (xxx.xx) |
| Median                                                      | xxx.x          | xxx.x          |
| Minimum                                                     | xxx            | xxx            |
| Maximum                                                     | xxx            | xxx            |
| n                                                           | xx             | xx             |
| Visit 6 (Month 12)                                          |                |                |
| Mean (sd)                                                   | xxx.x (xxx.xx) | xxx.x (xxx.xx) |
| Median                                                      | xxx.x          | xxx.x          |
| Minimum                                                     | xxx            | xxx            |
| Maximum                                                     | xxx            | xxx            |
| n                                                           | xx             | xx             |
| Visit 7 (Month 15)                                          |                |                |
| Mean (sd)                                                   | xxx.x (xxx.xx) | xxx.x (xxx.xx) |
| Median                                                      | xxx.x          | xxx.x          |
| Minimum                                                     | xxx            | xxx            |
| Maximum                                                     | xxx            | xxx            |
| n                                                           | xx             | xx             |
| •                                                           | •              | •              |
| •                                                           | •              | •              |
| At 3 monthly intervals until final visit (at least 3 years) |                |                |

**Population: Full Analysis Set**

TABLE 3.8.1  
**SERUM CREATININE (mg/dl) OVER TIME: SUMMARY**

|                    | Octreotide-LAR | Placebo        |
|--------------------|----------------|----------------|
| Visit 2 (Month 0)  |                |                |
| Mean (sd)          | xxx.x (xxx.xx) | xxx.x (xxx.xx) |
| Median             | xxx.x          | xxx.x          |
| Minimum            | xxx            | xxx            |
| Maximum            | xxx            | xxx            |
| n                  | xx             | xx             |
| Visit 3 (Month 3)  |                |                |
| Mean (sd)          | xxx.x (xxx.xx) | xxx.x (xxx.xx) |
| Median             | xxx.x          | xxx.x          |
| Minimum            | xxx            | xxx            |
| Maximum            | xxx            | xxx            |
| n                  | xx             | xx             |
| Visit 4 (Month 6)  |                |                |
| Mean (sd)          | xxx.x (xxx.xx) | xxx.x (xxx.xx) |
| Median             | xxx.x          | xxx.x          |
| Minimum            | xxx            | xxx            |
| Maximum            | xxx            | xxx            |
| n                  | xx             | xx             |
| Visit 5 (Month 9)  |                |                |
| Mean (sd)          | xxx.x (xxx.xx) | xxx.x (xxx.xx) |
| Median             | xxx.x          | xxx.x          |
| Minimum            | xxx            | xxx            |
| Maximum            | xxx            | xxx            |
| n                  | xx             | xx             |
| Visit 6 (Month 12) |                |                |
| Mean (sd)          | xxx.x (xxx.xx) | xxx.x (xxx.xx) |
| Median             | xxx.x          | xxx.x          |
| Minimum            | xxx            | xxx            |
| Maximum            | xxx            | xxx            |
| n                  | xx             | xx             |
| Visit 7 (Month 15) |                |                |
| Mean (sd)          | xxx.x (xxx.xx) | xxx.x (xxx.xx) |
| Median             | xxx.x          | xxx.x          |
| Minimum            | xxx            | xxx            |
| Maximum            | xxx            | xxx            |
| n                  | xx             | xx             |
| •                  | •              | •              |
| •                  | •              | •              |

At 3 monthly intervals until final visit (at least 3 years)

**Population: Full Analysis Set**

[Note: Tables 3.9.1-3.25.3, 3.26.1-3.26.3, 3.27.1-3.33.3, 3.34.1-3.38.3, 3.39.1-3.39.3, 3.40.1-3.40.3, 3.41.1-3.44.3, 3.45.1-3.49.3, 3.50.1-3.51.3, will be displayed as Table 3.8.1]

Table 3.52 Estimated Glomerular Filtration Rate using MDRD formula (eGFR<sub>mdrd</sub>) at baseline, 6-month, and 1-year, 2-year and 3-year follow-up in the study group as a whole (Overall), and in the two strata (CCC absent or CCC present) considered separately according to treatment with Octreotide-LAR or placebo.

| OCTREOTIDE-LAR |                              |                        |                        |                        |                        |                        |                        |                        |
|----------------|------------------------------|------------------------|------------------------|------------------------|------------------------|------------------------|------------------------|------------------------|
|                |                              | Baseline<br>(n=xx)     | 6 mo<br>(n=xx)         | 1 yr<br>(n=xx)         | 2 yrs<br>(n=xx)        | 3 yrs<br>(n=xx)        | Baseline<br>(n=xx)     | 6 mo<br>(n=xx)         |
| Overall        | Actual value*                | xx.x<br>[xx.x to xx.x] |
|                | Total Slope°<br>0-3 yrs      |                        |                        |                        |                        | xx.x<br>[xx.x to xx.x] |                        |                        |
|                | Chronic slope°<br>6 mo-3 yrs |                        |                        |                        |                        | xx.x<br>[xx.x to xx.x] |                        |                        |
| CCC<br>absent  | Actual value*                | xx.x<br>[xx.x to xx.x] |
|                | Total Slope<br>0-3 yrs       |                        |                        |                        |                        | xx.x<br>[xx.x to xx.x] |                        |                        |
|                | Chronic slope<br>6 mo-3 yrs  |                        |                        |                        |                        | xx.x<br>[xx.x to xx.x] |                        |                        |
| CCC<br>present | Actual value*                | xx.x<br>[xx.x to xx.x] |
|                | Total Slope<br>0-3 yrs       |                        |                        |                        |                        | xx.x<br>[xx.x to xx.x] |                        |                        |
|                | Chronic slope<br>6 mo-3 yrs  |                        |                        |                        |                        | xx.x<br>[xx.x to xx.x] |                        |                        |

Annual eGFR<sub>mdrd</sub> slope value is median [interquartile range, IQR]. eGFR=estimated glomerular filtration rate, \* ml/min/1.73m<sup>2</sup>; ° ml/min/1.73m<sup>2</sup>per year

Table 3.52 Estimated Glomerular Filtration Rate using CKI-EPI formula (eGFR<sub>ckd-epi</sub>) at baseline, 6-month, and 1-year, 2-year and 3-year follow-up in the study group as a whole (Overall), and in the two strata (CCC absent or CCC present) considered separately according to treatment with Octreotide-LAR or placebo.

| OCTREOTIDE-LAR |                              |                        |                        |                        |                        |                        |                        |                        |
|----------------|------------------------------|------------------------|------------------------|------------------------|------------------------|------------------------|------------------------|------------------------|
|                |                              | Baseline<br>(n=xx)     | 6 mo<br>(n=xx)         | 1 yr<br>(n=xx)         | 2 yrs<br>(n=xx)        | 3 yrs<br>(n=xx)        | Baseline<br>(n=xx)     | 6 mo<br>(n=xx)         |
| Overall        | Actual value*                | xx.x<br>[xx.x to xx.x] |
|                | Total Slope°<br>0-3 yrs      |                        |                        |                        |                        | xx.x<br>[xx.x to xx.x] |                        |                        |
|                | Chronic slope°<br>6 mo-3 yrs |                        |                        |                        |                        | xx.x<br>[xx.x to xx.x] |                        |                        |
| CCC<br>absent  | Actual value*                | xx.x<br>[xx.x to xx.x] |
|                | Total Slope<br>0-3 yrs       |                        |                        |                        |                        | xx.x<br>[xx.x to xx.x] |                        |                        |
|                | Chronic slope<br>6 mo-3 yrs  |                        |                        |                        |                        | xx.x<br>[xx.x to xx.x] |                        |                        |
| CCC<br>present | Actual value*                | xx.x<br>[xx.x to xx.x] |
|                | Total Slope<br>0-3 yrs       |                        |                        |                        |                        | xx.x<br>[xx.x to xx.x] |                        |                        |

|                             |                        |
|-----------------------------|------------------------|
| Chronic slope<br>6 mo-3 yrs | xx.x<br>[xx.x to xx.x] |
|-----------------------------|------------------------|

Annual eGFR<sub>ckd-epi</sub> slope value is median [interquartile range, IQR].eGFR=estimated glomerular filtration rate, \* ml/min/1.73m<sup>2</sup>; ° ml/min/1.73m<sup>2</sup>per year

TABLE 3.53.1

TIME TO ESRD: SUMMARY

|                                             | Octreotide-LAR      | Placebo             |
|---------------------------------------------|---------------------|---------------------|
| <b>Number of Patients</b>                   | <b>xx</b>           | <b>xx</b>           |
| Number of patients events-free              |                     |                     |
| 6 months                                    | xx (xx%)            | xx (xx%)            |
| 12 months                                   | xx (xx%)            | xx (xx%)            |
| ●                                           | ●                   | ●                   |
| ●                                           | ●                   | ●                   |
| ●                                           | ●                   | ●                   |
| Median time to event (95% CI <sup>a</sup> ) | xx.x (xx.x to xx.x) | xx.x (xx.x to xx.x) |
| Number (%) of censored patients             | xx (xx%)            | xx (xx%)            |

Population: Full Analysis Set

<sup>a</sup> Calculated using Greenwood’s formula

TABLE 3.53.2

**TIME TO ESRD: STATISTICAL ANALYSIS (PH MODEL)**

| Covariate                 | Parameter Estimate | Standard Error | p-value |
|---------------------------|--------------------|----------------|---------|
| Age                       | x.xx               | x.xx           | x.xxx   |
| Sex                       | x.xx               | x.xx           | x.xxx   |
| Baseline Serum Creatinine | x.xx               | x.xx           | x.xxx   |

  

| Treatment Comparison      | Hazard Ratio (SE) | 95% CI for the Hazard Ratio | p-value <sup>a</sup> |
|---------------------------|-------------------|-----------------------------|----------------------|
| Octreotide-LAR vs Placebo | xx.x (xx.x)       | xx.x to xx.x                | x.xxx                |

**Population: Full Analysis Set**

<sup>a</sup> A p-value <0.05 will be considered to be evidence of a significant difference between the treatment groups

TABLE 3.54.1

**TIME TO DOUBLING OF SERUM CREATININE OR ESRD: SUMMARY**

|                                             | Octreotide-LAR      | Placebo             |
|---------------------------------------------|---------------------|---------------------|
| <b>Number of Patients</b>                   | <b>xx</b>           | <b>xx</b>           |
| Number of patients events-free              |                     |                     |
| 6 months                                    | xx (xx%)            | xx (xx%)            |
| 12 months                                   | xx (xx%)            | xx (xx%)            |
| ●                                           | ●                   | ●                   |
| ●                                           | ●                   | ●                   |
| ●                                           | ●                   | ●                   |
| Median time to event (95% CI <sup>a</sup> ) | xx.x (xx.x to xx.x) | xx.x (xx.x to xx.x) |
| Number (%) of censored patients             | xx (xx%)            | xx (xx%)            |

**Population: Full Analysis Set**

<sup>a</sup> Calculated using Greenwood’s formula

TABLE 3.54.2

**TIME TO DOUBLING OF SERUM CREATININE OR ESRD: STATISTICAL ANALYSIS (PH MODEL)**

| Covariate | Parameter Estimate | Standard Error | p-value |
|-----------|--------------------|----------------|---------|
|-----------|--------------------|----------------|---------|

|                           |      |      |       |
|---------------------------|------|------|-------|
| Age                       | X.XX | X.XX | X.XXX |
| Sex                       | X.XX | X.XX | X.XXX |
| Baseline Serum Creatinine | X.XX | X.XX | X.XXX |

| Treatment Comparison      | Hazard Ratio<br>(SE) | 95% CI for the<br>Hazard Ratio | p-value <sup>a</sup> |
|---------------------------|----------------------|--------------------------------|----------------------|
| Octreotide-LAR vs Placebo | xx.x (xx.x)          | xx.x to xx.x                   | x.xxx                |

**Population: Full Analysis Set**

<sup>a</sup> A p-value <0.05 will be considered to be evidence of a significant difference between the treatment groups

TABLE 3.55.1

TIME TO OVERALL MORTALITY: SUMMARY

|                                             | Octreotide-LAR      | Placebo             |
|---------------------------------------------|---------------------|---------------------|
| <b>Number of Patients</b>                   | <b>xx</b>           | <b>xx</b>           |
| Number of patients events-free              |                     |                     |
| 6 months                                    | xx (xx%)            | xx (xx%)            |
| 12 months                                   | xx (xx%)            | xx (xx%)            |
| ●                                           | ●                   | ●                   |
| ●                                           | ●                   | ●                   |
| ●                                           | ●                   | ●                   |
| Median time to event (95% CI <sup>a</sup> ) | xx.x (xx.x to xx.x) | xx.x (xx.x to xx.x) |
| Number (%) of censored patients             | xx (xx%)            | xx (xx%)            |

Population: Full Analysis Set

<sup>a</sup> Calculated using Greenwood’s formula

TABLE 3.55.2

TIME TO OVERALL MORTALITY: STATISTICAL ANALYSIS (PH MODEL)

| Covariate                 | Parameter Estimate | Standard Error | p-value |
|---------------------------|--------------------|----------------|---------|
| Age                       | x.xx               | x.xx           | x.xxx   |
| Sex                       | x.xx               | x.xx           | x.xxx   |
| Baseline Serum Creatinine | x.xx               | x.xx           | x.xxx   |

  

| Treatment Comparison      | Hazard Ratio (SE) | 95% CI for the Hazard Ratio | p-value <sup>a</sup> |
|---------------------------|-------------------|-----------------------------|----------------------|
| Octreotide-LAR vs Placebo | xx.x (xx.x)       | xx.x to xx.x                | x.xxx                |

Population: Full Analysis Set

<sup>a</sup> A p-value <0.05 will be considered to be evidence of a significant difference between the treatment groups

TABLE 3.56.1

TIME TO CARDIOVASCULAR MORTALITY: SUMMARY

|                                             | Octreotide-LAR      | Placebo             |
|---------------------------------------------|---------------------|---------------------|
| Number of Patients                          | xx                  | xx                  |
| Number of patients events-free              |                     |                     |
| 6 months                                    | xx (xx%)            | xx (xx%)            |
| 12 months                                   | xx (xx%)            | xx (xx%)            |
| ●                                           | ●                   | ●                   |
| ●                                           | ●                   | ●                   |
| ●                                           | ●                   | ●                   |
| Median time to event (95% CI <sup>a</sup> ) | xx.x (xx.x to xx.x) | xx.x (xx.x to xx.x) |
| Number (%) of censored patients             | xx (xx%)            | xx (xx%)            |

Population: Full Analysis Set

<sup>a</sup> Calculated using Greenwood’s formula

TABLE 3.56.2

**TIME TO CARDIOVASCULAR MORTALITY: STATISTICAL ANALYSIS (PH MODEL)**

| Covariate                 | Parameter Estimate | Standard Error | p-value |
|---------------------------|--------------------|----------------|---------|
| Age                       | x.xx               | x.xx           | x.xxx   |
| Sex                       | x.xx               | x.xx           | x.xxx   |
| Baseline Serum Creatinine | x.xx               | x.xx           | x.xxx   |

  

| Treatment Comparison      | Hazard Ratio (SE) | 95% CI for the Hazard Ratio | p-value <sup>a</sup> |
|---------------------------|-------------------|-----------------------------|----------------------|
| Octreotide-LAR vs Placebo | xx.x (xx.x)       | xx.x to xx.x                | x.xxx                |

**Population: Full Analysis Set**

<sup>a</sup> A p-value <0.05 will be considered to be evidence of a significant difference between the treatment groups

TABLE 3.57.1

**TIME TO NON-CARDIOVASCULAR MORTALITY: SUMMARY**

|                |         |
|----------------|---------|
| Octreotide-LAR | Placebo |
|----------------|---------|

| Number of Patients                          | xx                  | xx                  |
|---------------------------------------------|---------------------|---------------------|
| Number of patients events-free              |                     |                     |
| 6 months                                    | xx (xx%)            | xx (xx%)            |
| 12 months                                   | xx (xx%)            | xx (xx%)            |
| •                                           | •                   | •                   |
| •                                           | •                   | •                   |
| •                                           | •                   | •                   |
| Median time to event (95% CI <sup>a</sup> ) | xx.x (xx.x to xx.x) | xx.x (xx.x to xx.x) |
| Number (%) of censored patients             | xx (xx%)            | xx (xx%)            |

**Population: Full Analysis Set**

<sup>a</sup> Calculated using Greenwood’s formula

TABLE 3.57.2

**TIME TO NON-CARDIOVASCULAR MORTALITY: STATISTICAL ANALYSIS (PH MODEL)**

| Covariate                 | Parameter Estimate | Standard Error | p-value |
|---------------------------|--------------------|----------------|---------|
| Age                       | x.xx               | x.xx           | x.xxx   |
| Sex                       | x.xx               | x.xx           | x.xxx   |
| Baseline Serum Creatinine | x.xx               | x.xx           | x.xxx   |

| Treatment Comparison      | Hazard Ratio<br>(SE) | 95% CI for the<br>Hazard Ratio | p-value <sup>a</sup> |
|---------------------------|----------------------|--------------------------------|----------------------|
| Octreotide-LAR vs Placebo | xx.x (xx.x)          | xx.x to xx.x                   | x.xxx                |

**Population: Full Analysis Set**

<sup>a</sup> A p-value <0.05 will be considered to be evidence of a significant difference between the treatment groups

TABLE 4.1

**SUMMARY OF ADVERSE EVENTS**

|                                                                               | Octreotide-LAR | Placebo   |
|-------------------------------------------------------------------------------|----------------|-----------|
| <b>Number of Patients</b>                                                     | <b>xx</b>      | <b>xx</b> |
| No (%) of patients with an adverse event                                      | xx (xx%)       | xx (xx%)  |
| No (%) of patients with a serious adverse event                               | xx (xx%)       | xx (xx%)  |
| No (%) of patients with a non -serious adverse event                          | xx (xx%)       | xx (xx%)  |
| No (%) of patients with a severe adverse event                                | xx (xx%)       | xx (xx%)  |
| No (%) of patients with an event probably related to study drug               | xx (xx%)       | xx (xx%)  |
| No (%) of patients with an adverse event leading to permanent discontinuation | xx (xx%)       | xx (xx%)  |
| Average number of events per patient                                          | xx.x           | xx.x      |
| Average number of events per patient (with a least 1 event)                   | xx.x           | xx.x      |
| No (%) of deaths                                                              | xx (xx%)       | xx (xx%)  |

**Population: Full Analysis Set**

TABLE 4.2

**SUMMARY OF SERIOUS ADVERSE EVENTS**

|                                                                 | Octreotide-LAR | Placebo   |
|-----------------------------------------------------------------|----------------|-----------|
| <b>Number of Patients</b>                                       | <b>xx</b>      | <b>xx</b> |
| No (%) of patients with an adverse event                        | xx (xx%)       | xx (xx%)  |
| No (%) of patients with a severe adverse event                  | xx (xx%)       | xx (xx%)  |
| No (%) of patients with an event probably related to study drug | xx (xx%)       | xx (xx%)  |
| Average number of events per patient                            | xx.x           | xx.x      |
| Average number of events per patient (with a least 1 event)     | xx.x           | xx.x      |
| No (%) of deaths                                                | xx (xx%)       | xx (xx%)  |

**Population: Full Analysis Set**

TABLE 4.3

**FREQUENCY OF ADVERSE EVENTS BY BODY SYSTEM AND PREFERRED TERM**

|                           | Octreotide-LAR | Placebo   |
|---------------------------|----------------|-----------|
| <b>Number of Patients</b> | <b>xx</b>      | <b>xx</b> |
| Body System 1             | xx (xx%)       | xx (xx%)  |
| Preferred Term 1          | xx (xx%)       | xx (xx%)  |
| •                         | •              | •         |
| •                         | •              | •         |
| •                         | •              | •         |
| Preferred Term n          | xx (xx%)       | xx (xx%)  |
| •                         | •              | •         |
| •                         | •              | •         |
| •                         | •              | •         |
| Body System n             | xx (xx%)       | xx (xx%)  |
| Preferred Term 1          | xx (xx%)       | xx (xx%)  |
| •                         | •              | •         |
| •                         | •              | •         |
| •                         | •              | •         |
| Preferred Term n          | xx (xx%)       | xx (xx%)  |

**Population: Full Analysis Set**

TABLE 4.4

**FREQUENCY OF SERIOUS ADVERSE EVENTS BY BODY SYSTEM AND  
PREFERRED TERM**

|                           | Octreotide-LAR | Placebo   |
|---------------------------|----------------|-----------|
| <b>Number of Patients</b> | <b>xx</b>      | <b>xx</b> |
| Body System 1             | xx (xx%)       | xx (xx%)  |
| Preferred Term 1          | xx (xx%)       | xx (xx%)  |
| •                         | •              | •         |
| •                         | •              | •         |
| •                         | •              | •         |
| Preferred Term n          | xx (xx%)       | xx (xx%)  |
| •                         | •              | •         |
| •                         | •              | •         |
| •                         | •              | •         |
| Body System n             | xx (xx%)       | xx (xx%)  |
| Preferred Term 1          | xx (xx%)       | xx (xx%)  |
| •                         | •              | •         |
| •                         | •              | •         |
| •                         | •              | •         |
| Preferred Term n          | xx (xx%)       | xx (xx%)  |

**Population: Full Analysis Set**

*[Note: Tables 4.7 to 4.9 will be produced using this template. See Section 4 of Statistical Analysis Plan for table titles]*

TABLE 4.5

PATIENT DEATHS

|                      | Octreotide-LAR | Placebo  |
|----------------------|----------------|----------|
| Number of Patients   | xx             | xx       |
| Number (%) of Deaths | xx (xx%)       | xx (xx%) |
| Reason for Death     |                |          |
| Reason 1             | xx (xx%)       | xx (xx%) |
| •                    | •              | •        |
| •                    | •              | •        |
| •                    | •              | •        |
| Reason n             | xx (xx%)       | xx (xx%) |

Population: Full Analysis Set

TABLE 4.6

**LABORATORY TESTS AT BASELINE (VISIT B1-WEEK 0)**

| Laboratory Parameter | Octreotide-LAR | Placebo        |
|----------------------|----------------|----------------|
| Creatinine (mg/dl)   |                |                |
| Mean (sd)            | xxx.x (xxx.xx) | xxx.x (xxx.xx) |
| Median               | xxx.x          | xxx.x          |
| Minimum              | xxx            | xxx            |
| Maximum              | xxx            | xxx            |
| n                    | xx             | xx             |
| N <sup>§</sup>       | xx (xx%)       | xx (xx%)       |
| A <sup>§</sup>       | xx (xx%)       | xx (xx%)       |
| •                    | •              | •              |
| •                    | •              | •              |
| •                    | •              | •              |
| •                    | •              | •              |
| (%)                  |                |                |
| Mean (sd)            | xxx.x (xxx.xx) | xxx.x (xxx.xx) |
| Median               | xxx.x          | xxx.x          |
| Minimum              | xxx            | xxx            |
| Maximum              | xxx            | xxx            |
| n                    | xx             | xx             |
| Low                  | xx (xx%)       | xx (xx%)       |
| Normal               | xx (xx%)       | xx (xx%)       |
| High                 | xx (xx%)       | xx (xx%)       |

**Population: Full Analysis Set**

**§ Note: N=Normal or abnormal, but not clinically relevant; A=Abnormal and clinically relevant**

TABLE 4.7

**LABORATORY TEST SHIFT TABLE-CREATININE (mg/dl)**

| Octreotide-       |                 |                 |                 |                 |
|-------------------|-----------------|-----------------|-----------------|-----------------|
| LAR               |                 |                 |                 |                 |
|                   | NN <sup>§</sup> | NA <sup>§</sup> | AN <sup>§</sup> | AA <sup>§</sup> |
| Visit B2 (Week 1) | xx              | xx              | xx              | xx              |
| Visit B4 (Week 3) | xx              | xx              | xx              | xx              |
| Visit B5 (Week 6) | xx              | xx              | xx              | xx              |
| Visit B6 (Week 9) | xx              | xx              | xx              | xx              |
| ●                 | ●               | ●               | ●               | ●               |
| ●                 | ●               | ●               | ●               | ●               |
| ●                 | ●               | ●               | ●               | ●               |
| Final Visit       | xx              | xx              | xx              | xx              |

  

| Placebo           |                 |                 |                 |                 |
|-------------------|-----------------|-----------------|-----------------|-----------------|
|                   | LL <sup>§</sup> | LN <sup>§</sup> | LH <sup>§</sup> | NL <sup>§</sup> |
| Visit B2 (Week 1) | xx              | xx              | xx              | xx              |
| Visit B4 (Week 3) | xx              | xx              | xx              | xx              |
| Visit B5 (Week 6) | xx              | xx              | xx              | xx              |
| Visit B6 (Week 9) | xx              | xx              | xx              | xx              |
| ●                 | ●               | ●               | ●               | ●               |
| ●                 | ●               | ●               | ●               | ●               |
| ●                 | ●               | ●               | ●               | ●               |
| Final Visit       | xx              | xx              | xx              | xx              |

**Population: Full Analysis Set****§ Note: N=Normal or abnormal, but not clinically relevant; A=Abnormal and clinically relevant***[Note: Tables 4.8 to 4.23 will be produced in a similar format]*

TABLE 4.24

**SUMMARY STATISTICS FOR CHANGE FROM BASELINE-CREATININE (mg/dl)**

| Octreotide-LAR    |                |                      | Placebo        |                      |
|-------------------|----------------|----------------------|----------------|----------------------|
|                   | Absolute Value | Change from Baseline | Absolute Value | Change from Baseline |
| Visit B1 (Week 0) |                |                      |                |                      |
| Mean (sd)         | xx.x (xx.xx)   |                      | xx.x (xx.xx)   |                      |
| Median            | xx.x           |                      | xx.x           |                      |
| Minimum           | xx             |                      | xx             |                      |
| Maximum           | xx             |                      | xx             |                      |
| n                 | xx             |                      | xx             |                      |
| Visit B2 (Week 1) |                |                      |                |                      |
| Mean (sd)         | xx.x (xx.xx)   | xx.x (xx.xx)         | xx.x (xx.xx)   | xx.x (xx.xx)         |
| Median            | xx.x           | xx.x                 | xx.x           | xx.x                 |
| Minimum           | xx             | xx                   | xx             | xx                   |
| Maximum           | xx             | xx                   | xx             | xx                   |
| n                 | xx             | xx                   | xx             | xx                   |
| ●                 |                |                      |                |                      |
| ●                 |                |                      |                |                      |
| ●                 |                |                      |                |                      |
| ●                 |                |                      |                |                      |
| Final Visit       |                |                      |                |                      |
| Mean (sd)         | xx.x (xx.xx)   | xx.x (xx.xx)         | xx.x (xx.xx)   | xx.x (xx.xx)         |
| Median            | xx.x           | xx.x                 | xx.x           | xx.x                 |
| Minimum           | xx             | xx                   | xx             | xx                   |
| Maximum           | xx             | xx                   | xx             | xx                   |
| n                 | xx             | xx                   | xx             | xx                   |

**Population: Full Analysis Set**

*[Note: Tables 4.25 to 4.27 will be produced in a similar format]*
